# Supplementary material for: Synthesis and identification of new sacubitril derivatives as lead compounds for antibacterial, antifungal and antitubercular (TB) activities against dormant tuberculosis
Source: Royal Society of Chemistry journal article supplement (doi:10.1039/d3ra00713h), 2023-01-01
Supplement: d3ra00713h1.pdf [file d3ra00713h1.pdf]

## Supporting Information

### **Synthesis and Identification of New Sacubitril Derivatives as Lead Compounds for Antibacterial, Antifungal and Antitubercular (TB) Activities against Dormant Tuberculosis**

Dodda Bhargavi,<sup>a</sup> Srihari Konduri,<sup>b</sup> Jyothi Prashanth,<sup>c</sup> Sowjanya Pulipati,<sup>d</sup> K. K. Praneeth,<sup>e</sup> Malladi Sireesha,<sup>a</sup> and Koya Prabhakara Rao<sup>\*a</sup>

<sup>a</sup>New Generation Materials Lab (NGML), Department of Chemistry, School of Applied Science and Humanities, Vignan's Foundation for Science Technology and Research (VFSTR) (Deemed to be University), Vadlamudi, Guntur-522 213, Andhra Pradesh, India.

<sup>b</sup>Skaggs School of Pharmacy and Pharmaceutical Sciences, UC San Diego, 9500 Gilman Drive, La Jolla, California 92093, United States.

<sup>c</sup>Department of Physics, Kakatiya University, Warangal-506009, Telangana, India.

<sup>d</sup>Department of Pharmaceutical Biotechnology, Vignan Pharmacy College, Vadlamudi, Guntur-522213, Andhra Pradesh, India.

<sup>e</sup>Kalasalingam Academy of Research and Education (Deemed to be University), Krishnankoil-626126, Tamil Nadu, India

Contact for correspondence Tel.: +91 9676157858; E-mail address:[drkpr\\_sh@vignan.ac.in](mailto:drkpr_sh@vignan.ac.in);[kprao2005@gmail.com](mailto:kprao2005@gmail.com)

|    |                                                                                                                          |       |
|----|--------------------------------------------------------------------------------------------------------------------------|-------|
| 1  | Synthesis of compound 1                                                                                                  | 2     |
| 2. | Synthesis and spectral data of compounds 1, 2, 3 & 4                                                                     | 2-4   |
| 3. | Synthesis and spectral data of the compounds 5 (a-v)                                                                     | 4-16  |
| 4. | The characterization spectra ( <sup>1</sup> H-NMR, <sup>13</sup> C-NMR & mass spectra) of the synthesized compounds 5a-v | 17-83 |
| 5. | Biological assays                                                                                                        | 84-86 |

## 1. Synthesis of the compound 1

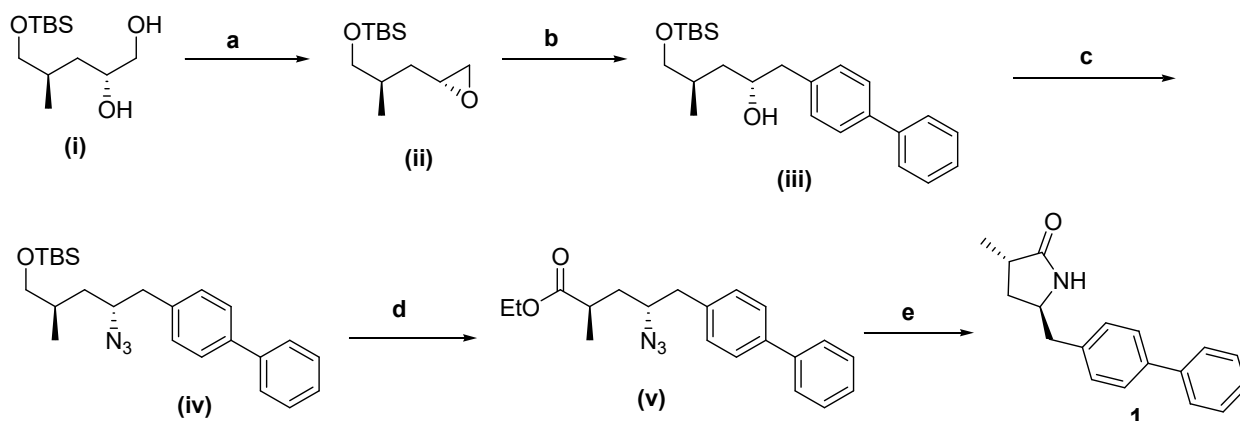

Reagents and conditions: (a)  $\text{C}_4\text{F}_9\text{SO}_2\text{F}$ , DBU, DCM,  $0\text{ }^\circ\text{C}$ ; (b) (1,1'-biphenyl)-4-ylmagnesium bromide,  $\text{CuBr}\cdot\text{Me}_2\text{S}$ ,  $0^\circ\text{C}$ ; (c) (i)  $\text{MsCl}$ ,  $\text{Et}_3\text{N}$ , DMAP, DCM,  $0^\circ\text{C}$ , 3h; (ii)  $\text{NaN}_3$ , DMF,  $60^\circ\text{C}$ , 6h; (d) (i) Jones oxidation,  $0^\circ\text{C}$ ; (ii)  $\text{SOCl}_2$ , EtOH, RT; (e) Pd/C,  $\text{H}_2$ , MeOH.

2. Procedure for the synthesis of (2R,4S)-5-([1,1'-biphenyl]-4-yl)-4-(amino)-2-methylpentanoic acid. HCl (2).

The a stirred solution of (3R,5S)-5-[(Biphenyl-4-yl)methyl]-3-methylpyrrolidin-2-one1 (1.0 mmol), Acetic acid (1.5 mmol) and HCl(1.5 mmol) and heated for 15h at  $90\text{ }^\circ\text{C}$ . The reaction mixture (RM) was allowed to room temperature (RT), Add ethyl acetate and stir for 2-3 hr at  $10\text{-}15^\circ\text{C}$ . Filter the compound and wash with EtOAc. To get compound 2 as off-white solid (85% yield). M.P.  $194.3\text{-}197.8\text{ }^\circ\text{C}$ ;  $^1\text{H}$  NMR (300 MHz, DMSO- $d_6$ )  $\delta$ : 12.32 (s, 1H), 8.22 (s, 2H), 7.66 (t, 4H), 7.46 (t, 2H), 7.37 (d,  $J = 7.5\text{ Hz}$ , 3H), 3.41 (m, 1H), 3.05 (m, 1H), 2.85 (m, 1H), 2.66 (m, 1H), 1.85 (m, 1H), 1.28 (m, 1H), 1.06 (d,  $J = 6.9$ , 3H);  $^{13}\text{C}$  NMR (75 MHz, DMSO)  $\delta$ : 176.5, 139.7, 138.5, 135.6, 130.0, 128.9, 127.3, 126.7, 126.5, 50.3, 38.0, 35.7, 34.9, 17.5; IR (neat):  $\nu_{\text{max}}$  3427, 2931, 1617, 1580, 1404, 1159, 759  $\text{cm}^{-1}$ ; MS:  $m/z$  284.1 ( $M+\text{H}^+$ ).

Procedure for the synthesis of (2R,4S)-5-([1,1'-biphenyl]-4-yl)-4-((tert-butoxycarbonyl)amino)-2-methylpentanoic acid (3).

To a stirred solution of compound 2 (1 mmol) in DCM (150 ml) at RT. Add DIPEA (2.1 mmol) and stir the RM for 15 minutes, Boc anhydride (1.2 mmol) was added then the RM was stirred for 6h at RT. Add water and extracted with DCM (2 x 100 ml). The combined organic layer was washed with brine solution, dried over Na<sub>2</sub>SO<sub>4</sub> and the solvent were evaporated under reduced pressure. To afford compound 3 as off-white solid (89% yield). M.P. 145.2-149.3 °C; <sup>1</sup>H NMR (300 MHz, CDCl<sub>3</sub>) δ 11.05 (s, 1H), 7.55 (m, 4H), 7.42 (t, 3H), 7.32 (m, 1H), 7.25 (m, 2H), 3.69 (m, 1H), 2.76 (m, 2H), 2.61 (m, 1H), 1.89 (m, 2H), 1.20 (d, *J* = 7.2 Hz, 3H); <sup>13</sup>C NMR (75 MHz, CDCl<sub>3</sub>) δ: 181.3, 157.4, 140.9, 139.4, 139.3, 137.8, 136.7, 129.9, 128.8, 127.1, 127.0, 79.8, 49.9, 42.3, 38.4, 36.6, 28.4, 17.7; IR (neat):  $\nu_{max}$  3024, 2930, 2533, 1700, 1647, 1602, 1414, 1214, 764 cm<sup>-1</sup>; MS: *m/z* 382.1 (*M*-H<sup>+</sup>).

Procedure for the synthesis of (2R,4S)-5-([1,1'-biphenyl]-4-yl)-4-(amino)-2-methylpentanoic acid ethyl ester hydrochloride (4).

To the solution of compound 3 (1 mmol) in Ethanol (50 mL). Heat to at 80 °C, then add SOCl<sub>2</sub> (1.5 mmol) to RM. Stir the reaction mass for 18 hrs at reflux. Then distill out the solvent under reduced pressure. Cool to RT and add n-Hexane. Stir for 45 mins. Filter the solid and to get compound 4 as white solid (94% yield). M.P: 156.4-160.2 °C; <sup>1</sup>H NMR (300 MHz, CDCl<sub>3</sub>) δ: 8.62 (s, 2H), 7.54 (t, 4H), 7.41 (t, 2H), 7.30 (m, 3H), 4.06 (q, 2H), 3.67 (s, 1H), 3.38 (m, 1H), 2.96 (m, 2H), 2.03 (m, 1H), 1.84 (m, 1H), 1.16 (m, 6H); <sup>13</sup>C NMR (75 MHz, CDCl<sub>3</sub>) δ: 175.3, 140.7, 140.1, 134.7, 129.9, 128.8, 127.6, 127.4, 127.1, 60.9, 52.3, 39.5, 36.2, 36.1, 17.9, 14.2; IR (neat):  $\nu_{max}$  2609, 1729, 1606, 1575, 1487, 1409, 1346, 1214, 1160, 761 cm<sup>-1</sup>; MS: *m/z* 311.9 (*M*+H<sup>+</sup>).

### 3. Synthesis and Spectral data for 5a-v.

#### **(2R,4S)-5-([1,1'-Biphenyl]-4-yl)-4-(2-bromo-5-fluorobenzoylamino)-2-methylpentanoic acid ethyl ester amide (5a).**

Under N<sub>2</sub> atmosphere to a stirred solution of compound (4) 40 mg (0.13 mmol, 1.0 eq) in dry dichloromethane (4 mL) at room temperature added the Hexafluorophosphate Azabenzotriazole Tetramethyl Uronium (HATU) (59 mg, 0.15 mmol, 1.2 eq) and DIPEA (44 μ, 0.26 mmol, 2.0 eq) simultaneously, after five minutes added the 2-bromo-5-fluoro benzoic acid (31 mg, 0.14 mmol, 1.1 eq) to the mixture. Later, the reaction mixture was stirred for 12 hours. After the completion of reaction, the crude product was diluted with an excess of DCM (10 mL), washed with saturated bicarbonate (3 mL) solution and brine solution. The organic layer dried with sodium sulfate and distilled out completely under a vacuum. The crude product was purified using column chromatography with ethyl acetate: Hexane mixture to get compound, 5a (58 mg, 88%).

Off white solid, 88% yield; M.P: 205-207 °C; <sup>1</sup>H NMR (400 MHz, CDCl<sub>3</sub>) δ: 7.58 (m, 5H), 7.43 (t, 2H), 7.33 (m, 3H), 7.07 (dd, 1H), 6.97 (m, 1H), 5.85 (d, *J* = 8.8 Hz, 1H), 4.49-4.44 (m, 1H), 4.15 (q, 2H), 2.99 (d, *J* = 6.4 Hz, 2H), 2.73-2.68 (m, 1H), 2.08-2.01 (m, 1H), 1.70-1.56 (m, 1H), 1.26-1.21 (m, 6H); <sup>13</sup>C NMR (75 MHz, CDCl<sub>3</sub>) δ: 176.4, 169.7, 161.2, 140.9, 139.7, 136.6, 135.0, 134.9, 130.0, 128.9, 127.3, 127.1, 118.6, 118.3, 116.9, 116.5, 60.8, 49.6, 40.6, 37.6, 36.6, 17.9, 14.3; IR (cm<sup>-1</sup>): 3313.71, 1736.08, 1643.12, 1440.72, 1486.646, 1378.33, 1304.225, 664.50; MS: *m/z* 511.2 (*M*+*H*), Calcd. for C<sub>27</sub>H<sub>27</sub>BrFNO<sub>3</sub>: C, 63.29; H, 5.31; N, 2.73. Found: C, 64.03; H, 5.68; N, 2.54.

**(2R,4S)-5-([1,1'-Biphenyl]-4-yl)-4-(2-(2-chlorophenyl)acetylamino)-2-methylpentanoic acid ethyl ester amide (5b).**

Similar method of synthesis of compound 5a, was employed for the synthesis of compounds 5(b-v) and the spectral data as follows.

Off white solid, 92% yield; M.P: 184-189 °C; <sup>1</sup>H NMR (400 MHz, CDCl<sub>3</sub>) δ: 7.57 (t, 2H), 7.45 (q, 4H), 7.38 (m, 2H), 7.26-7.20 (m, 3H), 7.09 (d, *J* = 8.0 Hz, 2H), 5.30 (t, 1H), 4.24 (q, 1H), 4.13 (q, 2H), 3.65 (q, 2H), 2.83-2.75 (m, 2H), 2.53-2.48 (m, 1H), 1.93-1.86 (m, 1H), 1.47-1.39 (m, 1H), 1.23 (t, 3H), 1.14 (d, *J* = 7.2 Hz, 3H); <sup>13</sup>C NMR (75 MHz, CDCl<sub>3</sub>) δ 176.3, 169.1, 140.9, 139.3, 136.5, 134.4, 133.1, 131.7, 129.8, 129.8, 128.9, 128.8, 127.4, 127.2, 127.1, 127.0, 60.6, 48.7, 41.7, 40.3, 37.7, 36.6, 17.8, 14.3; IR (cm<sup>-1</sup>): 3306.83, 3057.67, 1725.23, 1644.70, 1485.59, 741.33; MS: *m/z* 64.1 (*M*+H<sup>+</sup>), Calcd. for C<sub>28</sub>H<sub>30</sub>ClNO<sub>3</sub>: C, 72.48; H, 6.52; N, 3.02. Found: C, 72.89; H, 6.10; N, 2.64.

**(2R,4S)-5-([1,1'-Biphenyl]-4-yl)-4-(2,6-dimethoxybenzoylamino)-2-methylpentanoic acid ethyl ester amide (5c).**

Off white solid, 82% yield; M.P: 217-223 °C; <sup>1</sup>H NMR (400 MHz, CDCl<sub>3</sub>) δ: 7.56 (d, *J* = 7.2 Hz), 7.50 (d, *J* = 8.4 Hz, 2H), 7.42 (t, 2H), 7.35 (q, 3H), 7.22 (d, *J* = 8.8 Hz, 1H), 6.52 (d, *J* = 8.4 Hz, 2H), 5.56 (d, *J* = 8.8 Hz, 1H), 4.43 (q, 1H), 4.14 (q, 2H), 3.80 (s, 6H), 3.00 (d, *J* = 5.6 Hz, 2H), 2.80-2.75 (m, 1H), 2.04-1.97 (m, 1H), 1.59-1.50 (m, 1H), 1.25-1.20 (m, 6H); <sup>13</sup>C NMR (75 MHz, CDCl<sub>3</sub>) δ: 176.5, 165.4, 157.3, 141.0, 139.2, 137.0, 130.5, 130.4, 128.8, 127.1, 127.0, 126.9, 116.4, 103.9, 60.4, 55.8, 49.0, 40.4, 37.6, 36.4, 18.0, 14.2; IR (cm<sup>-1</sup>): 3311.87, 1727.58, 1518.93, 1592.04, 1642.09, 1252.46, MS: *m/z* 475.2 (*M*+H<sup>+</sup>), Calcd. for C<sub>29</sub>H<sub>33</sub>NO<sub>5</sub>: C, 73.24; H, 6.99; N, 2.95. Found: C, 72.54; H, 6.64; N, 2.49.

**(2R,4S)-5-([1,1'-Biphenyl]-4-yl)-4-(2-hydroxybenzoylamino)-2-methylpentanoic acid ethyl ester amide (5d).**

Off white solid, 91% yield; M.P: 232-236 °C; <sup>1</sup>H NMR (400 MHz, CDCl<sub>3</sub>) δ: 12.46 (s, 1H), 7.59-7.53 (m, 4H), 7.43 (t, 2H), 7.40(t, 2H), 7.33 (m, 3H), 6.98 (t, 1H), 6.84-6.80 (m,1H), 6.57 (d, *J* = 8.0 Hz, 1H), 4.49 (s, 1H), 4.15- 4.04 (m, 2H), 3.06 (q, 1H), 2.92 (q, 1H), 2.66-2.61 (m, 1H), 2.04- 1.97 (m,1H), 1.77- 1.70 (m, 1H), 1.22- 1.17 (m, 6H); <sup>13</sup>C NMR (75 MHz, CDCl<sub>3</sub>) δ: 176.9, 169.6, 161.7, 140.7, 139.6, 136.4, 134.2, 129.9, 128.8, 127.3, 127.0, 125.4, 118.7, 118.6, 114.3, 60.9, 48.4, 40.5, 36.4, 36.3, 17.2, 14.1; IR (cm<sup>-1</sup>): 3397.68, 1702.11, 1637.54, 1588.76, 1488.93, 1303.96 ; MS: *m/z* 432.0 (*M*+H<sup>+</sup>), Calcd. for C<sub>27</sub>H<sub>29</sub>NO<sub>4</sub>: C, 75.15; H, 6.77; N, 3.25. Found: C, 76.13; H, 7.15; N, 3.06.

**(2R,4S)-5-([1,1'-Biphenyl]-4-yl)-4-(3-(trifluoromethyl)benzoylamino)-2-methylpentanoic acid ethyl ester amide (5e).**

Off white solid, 94% yield; M.P:201-205 °C; <sup>1</sup>H NMR (400 MHz, CDCl<sub>3</sub>) δ: 7.99 (s, 1H), 7.89 (d, *J* = 7.6 Hz, 1H), 7.74 (d, *J* = 7.6 Hz, 1H), 7.58- 7.53 (m, 5H), 7.43 (t, 2H), 7.34 (q, 3H), 6.42 (d, *J* = 8.0 Hz, 1H), 4.45 (s,1H), 4.15- 4.07 (m, 2H), 3.08 (q, 1H), 2.96 (q, 1H), 2.6 (m, 1H), 2.05- 1.98 (m, 1H), 1.77- 1.74 (m, 1H), 1.25- 1.19 (m, 6H); <sup>13</sup>C NMR (75 MHz, CDCl<sub>3</sub>) δ: 176.9, 165.5, 14.0, 139.6, 138.3, 136.7, 130.0, 128.9, 127.8, 127.6, 127.3, 127.1, 125.8, 125.8, 125.7, 125.4, 60.6, 49.0, 40.2, 36.6, 36.5, 17.6, 14.3; IR (cm<sup>-1</sup>): 3248.91, 1725.57, 1631.15, 1436.13, 1486.73, 1071.48; MS: *m/z* 484.1 (*M*+H<sup>+</sup>), Calcd. for C<sub>28</sub>H<sub>28</sub>F<sub>3</sub>NO<sub>3</sub>: C, 69.55; H, 5.84; N, 2.90. Found: C, 68.59; H, 5.41; N, 3.40.

**(2R,4S)-5-([1,1'-Biphenyl]-4-yl)-4-(4-(trifluoromethyl)benzoylamino)-2-methylpentanoic acid ethyl ester amide (5f).**

Off white solid, 89% yield; M.P: 187-191°C; <sup>1</sup>H NMR 400 MHz, CDCl<sub>3</sub>) δ: 7.83 (d, *J* = 8.0 Hz, 2H), 7.68 (d, *J* = 8.0 Hz, 2H), 7.58- 7.53 (m, 4H), 7.43 (t, 2H), 7.33 (t, 1H), 7.29 (d, *J* = 8.0 Hz, 2H), 6.39 (d, *J* = 8.0 Hz, 1H), 4.46 (s, 1H), 4.12- 4.07 (m, 2H), 3.07 (q, 1H), 2.96 (q, 1H), 2.67 (t, 1H), 2.01 (q, 1H), 1.78 (t, 1H), 1.24 (m, 6H); <sup>13</sup>C NMR (75 MHz, CDCl<sub>3</sub>) δ: 176.9, 165.6, 140.8, 139.7, 138.0, 136.7, 130.0, 128.9, 127.4, 127.3, 127.3, 127.3, 127.1, 125.8, 125.7, 125.7, 125.6, 60.9, 49.2, 40.3, 36., 36.5, 17.3, 14.2; IR (cm<sup>-1</sup>): 3336.61, 1724.61, 1635.30, 1577.6, 1528.12, 1321.60; MS: *m/z* 484.1 (*M*+H<sup>+</sup>), Calcd. for C<sub>28</sub>H<sub>28</sub>F<sub>3</sub>NO<sub>3</sub>: C, 69.55; H, 5.84; N, 2.90. Found: C, 69.86; H, 6.05; N, 2.75.

**(2R,4S)-5-([1,1'-Biphenyl]-4-yl)-4-(2-fluorobenzoylamino)-2-methylpentanoic acid ethyl ester amide (5g).**

Off white solid, 88% yield; M.P:179-185 °C; <sup>1</sup>H NMR (400 MHz, CDCl<sub>3</sub>) δ: 8.07- 8.02 (m, 1H), 7.58 (d, *J* = 1.2 Hz, 2H), 7.55 (d, *J* = 12.0 Hz, 2H), 7.42 (t, 3H), 7.32 (t, 3H), 7.25 (d, *J* = 5.2 Hz, 1H), 7.10 (q, 1H), 6.56 (q, 1H), 4.51 (d, *J* = 2.8 Hz, 1H), 4.12- 4.06 (m, 2H), 3.02- 2.92 (m, 2H), 2.65- 2.60 (m, 1H), 1.16- 1.58 (m, 1H), 1.47 (t, 1H), 1.20 (d, *J* = 8.0 Hz, 6H); <sup>13</sup>C NMR (100 MHz, CDCl<sub>3</sub>) δ: 176.2, 162.9, 159.4, 140.9, 139.5, 136.7, 133.3, 133.2, 130.0, 128.8, 127.2, 127.0, 124.9, 121.3, 121.2, 116.2, 115.9, 60.4, 49.3, 40.6, 37.7, 36.7, 17.8, 14.2, 8.2; IR (cm<sup>-1</sup>): 3346.15, 1722.81, 1642.24, 1613.66, 1447.75, 1147.03; MS: *m/z* 434.6 (*M*+H<sup>+</sup>), Calcd. for C<sub>27</sub>H<sub>28</sub>FNO<sub>3</sub>: C, 74.80; H, 6.51; N, 3.23. Found: C, 73.99; H, 6.28; N, 2.98.

**(2R,4S)-5-([1,1'-Biphenyl]-4-yl)-4-(3,4-dichlorobenzoylamino)-2-methylpentanoic acid ethyl ester amide (5h).**

Off white solid, 93% yield; M.P: 214-218 °C; <sup>1</sup>H NMR (400 MHz, CDCl<sub>3</sub>) δ: 7.81 (d, *J* = 2.0 Hz, 1H), 7.58- 7.51 (m, 6H), 7.49- 7.41 (m, 3H), 7.34 (d, *J* = 7.2 Hz, 1H), 7.26 (d, *J* = 1.6 Hz, 1H), 6.35 (d, *J* = 7.6 Hz, 1H), 4.42 (q, 1H), 4.15- 4.07 (m, 2H), 3.05 (dd, 1H), 2.94 (dd,

1H), 2.69- 2.62 (m, 1H), 2.03- 1.96 (m, 1H), 1.79- 1.72 (m, 1H), 1.25- 1.18 (m, 6H); <sup>13</sup>C NMR (75 MHz, CDCl<sub>3</sub>) δ: 176.8, 164.7, 140.7, 139.6, 136.6, 135.8, 134.5, 133.0, 130.6, 129.9, 129.2, 128.8, 127.3, 127.0, 126.0, 60.9, 49.3, 40.3, 36.6, 36.5, 17.3, 14.2; IR (cm<sup>-1</sup>): 3278.01, 1721.18, 1633.32, 1586.14, 1488.68, 760.89; MS: *m/z* 484.2 (*M*+H<sup>+</sup>), Calcd. for C<sub>27</sub>H<sub>27</sub>Cl<sub>2</sub>NO<sub>3</sub>: C, 66.95; H, 5.62; N, 2.89. Found: C, 67.51; H, 5.98; N, 3.16.

**(2R,4S)-5-([1,1'-Biphenyl]-4-yl)-4-(2-(2,4-dichlorophenyl)acetylamino)-2-methylpentanoic acid ethyl ester amide(5i).**

Off white solid, 86% yield; M.P: 198-203 °C; <sup>1</sup>H NMR 400 MHz, CDCl<sub>3</sub>) δ: 7.58 (t, 2H), 7.44 (t, 4H), 7.38 - 7.32 (m, 2H), 7.20- 7.15 (m, 2H), 7.11 (d, *J* = 2.0 Hz, 2H), 5.35 (d, *J* = 8.8 Hz, 1H), 4.26- 4.20 (m, 1H), 4.13 (q, 2H), 3.59 (q, 2H), 2.85- 2.75 (m, 2H), 2.55- 2.50 (m, 1H), 1.94- 1.88 (m, 1H), 1.52- 1.45 (m, 1H), 1.24 (t, 3H), 1.15 (d, *J* = 7.2 Hz, 3H); <sup>13</sup>C NMR (75 MHz, CDCl<sub>3</sub>) δ: 176.4, 160.5, 140.8, 139.5, 136.5, 135.0, 134.0, 132.4, 131.7, 129.8, 129.5, 128.9, 127.6, 127.3, 127.1, 127.0, 60.6, 48.8, 41.0, 40.3, 37.6, 36.6, 17.8, 14.3; IR (cm<sup>-1</sup>): 3326.62, 1723.91, 1642.66, 1642.68, 1587.85, 1533.42, 759.91; MS: *m/z* 498.1 (*M*+H<sup>+</sup>), Calcd. for C<sub>28</sub>H<sub>29</sub>Cl<sub>2</sub>NO<sub>3</sub>: C, 67.47; H, 5.86; N, 2.81. Found: C, 68.43; H, 6.25; N, 2.62.

**(2R,4S)-5-([1,1'-Biphenyl]-4-yl)-4-(2-(2,4,5-trifluorophenyl)acetylamino)-2-methylpentanoic acid ethyl ester amide (5j).**

Off white solid, 79% yield; M.P: 238-242 °C; <sup>1</sup>H NMR (400 MHz, CDCl<sub>3</sub>) δ: 7.57 (d, *J* = 7.6 Hz, 2H), 7.49- 7.42 (m, 4H), 7.34 (t, 1H), 7.15 (d, *J* = 8.0 Hz, 2H), 7.10 (q, 1H), 6.93- 6.87 (m, 1H), 5.46 (d, *J* = 8.4 Hz, 1H) 4.22 (d, *J* = 3.6 Hz, 1H), 4.14 (q, 2H), 3.41 (d, *J* = 2.4 Hz, 2H), 2.83 (q, 2H), 2.52 (d, *J* = 4.8 Hz, 1H), 1.92 (q, 1H), 1.56- 1.50 (m, 1H), 1.24 (t, 3H) 1.16 (d, *J* = 7.2 Hz, 3H); <sup>13</sup>C NMR (100 MHz, CDCl<sub>3</sub>) δ: 176.4, 168.4, 157.0, 154.5, 150.6, 148.1, 148.0, 140.7, 139.5, 136.5, 129.8, 127.3, 127.1, 127.0, 119.3, 119.1, 118.5, 105.8, 105.6, 105.5, 105.3, 60.7, 48.9, 40.3, 37.4, 36.5, 36.1, 29.6, 17.6, 14.2.; <sup>19</sup>F NMR (400 MHz, CDCl<sub>3</sub>)



$\delta$ : -118.8 (s, 1F), -134.5 (t, 1F), -142.0 (t, 1F); IR ( $\text{cm}^{-1}$ ): 3294.27, 1646.52, 1730.84, 1542.48, 1486.07, 1465.23, 1517.83, 1173.96; MS:  $m/z$  484.2 ( $M+H^+$ ), Calcd. for  $\text{C}_{28}\text{H}_{28}\text{F}_3\text{NO}_3$ : C, 69.55; H, 5.84; N, 2.90. Found: C, 69.88; H, 6.18; N, 2.68.

**(2R,4S)-5-([1,1'-Biphenyl]-4-yl)-4-(2-(3,4,5-trimethoxyphenyl)acetylamino)-2-methylpentanoic acid ethyl ester amide (5k).**

Off white solid, 90% yield; M.P: 264-267 °C;  $^1\text{H}$  NMR (300 MHz,  $\text{CDCl}_3$ )  $\delta$ : 7.57 (d,  $J = 7.5$  Hz, 2H), 7.50 (d 2H), 7.42 (t, 2H), 7.35 (dd, 3H), 7.23 (t, 1H), 6.53 (d,  $J = 8.4$  Hz, 2H), 5.58 (d,  $J = 8.4$  Hz, 2H), 4.43 (m, 2H), 3.80 (t, 9H), 3.01 (d,  $J = 5.6$  Hz, 2H), 2.80- 2.75 (m, 1H), 2.04- 1.97 (m, 1H), 1.57- 1.50 (m, 1H), 1.25- 1.20 (m, 6H);  $^{13}\text{C}$  NMR (75 MHz,  $\text{CDCl}_3$ )  $\delta$ : 176.2, 170.3, 153.6, 140.6, 139.3, 137.2, 136.5, 130.5, 129.9, 128.8, 127.3, 127.0, 126.9, 106.3, 60.9, 60.6, 56.1, 48.6, 44.4, 40.1, 37.5, 36.6, 17.8, 14.2; IR ( $\text{cm}^{-1}$ ): 3312, 1740, 1680, 1625, 1440, 1533, 752; MS:  $m/z$  520.2 ( $M+H^+$ ), Calcd. for  $\text{C}_{31}\text{H}_{37}\text{NO}_6$ : C, 71.65; H, 7.18; N, 2.70. Found: C, 70.94; H, 6.85; N, 3.08.

**(2R,4S)-5-([1,1'-Biphenyl]-4-yl)-4-(2-(4-fluorophenyl)acetylamino)-2-methylpentanoic acid ethyl ester amide (5l).**

Off white solid, 86% yield; M.P: 196-199 °C;  $^1\text{H}$  NMR (400 MHz,  $\text{CDCl}_3$ )  $\delta$ : 7.57 (d,  $J = 7.6$  Hz, 2H), 7.45 (t, 4H), 7.35 (t, 1H), 7.09 (t, 4H), 6.98 (t, 2H), 5.22 (d,  $J = 8.4$  Hz, 1H), 4.22 (d,  $J = 4.8$  Hz, 1H), 4.13 (q, 2H), 3.45 (s, 2H), 2.83 (dd, 1H), 2.75 (dd, 1H), 2.50 (q, 1H), 1.93- 1.86 (m, 1H), 1.50- 1.42 (m, 1H), 1.24 (t, 3H), 1.14 (d,  $J = 7.2$  Hz, 3H);  $^{13}\text{C}$  NMR (75 MHz,  $\text{CDCl}_3$ )  $\delta$ : 176.3, 170.1, 160.4, 140.7, 139.4, 136.5, 131.0, 130.9, 130.7, 130.7, 129.8, 127.3, 127.1, 127.0, 115.9, 115.6, 60.6, 48.6, 43.1, 40.2, 37.6, 36.6, 17.7, 14.2; IR ( $\text{cm}^{-1}$ ): 3296.02, 1741.70, 1724.97, 1637.68, 1534.18, 1172.03, 698.34; MS:  $m/z$  448.3 ( $M+H^+$ ), Calcd for  $\text{C}_{28}\text{H}_{30}\text{FNO}_3$ : C, 75.14; H, 6.76; N, 3.13. Found: C, 74.62; H, 6.40; N, 3.45.

**(2R,4S)-5-([1,1'-Biphenyl]-4-yl)-4-(isonicotinoylamino)-2-methylpentanoicacid ethyl ester amide (5m).**

Pale yellow solid, 79% yield; M.P: 223-226 °C; <sup>1</sup>H NMR (400 MHz, CDCl<sub>3</sub>) δ: 8.72 (d, *J* = 5.2 Hz, 2H), 7.57 (q, 6H), 7.43 (t, 2H), 7.35 (t, 1H), 7.28 (d, *J* = 8.0 Hz, 2H), 6.51 (d, *J* = 8.0 Hz, 1H), 4.44 (s, 1H), 4.14- 4.07 (m, 2H), 3.06 (dd, 1H), 2.95 (q, 1H), 2.65 (d, *J* = 4.4 Hz, 1H), 2.04 1.97 (m, 1H), 1.81- 1.74 (m, 1H), 1.25- 1.19 (m, 6H); <sup>13</sup>C NMR (75 MHz, CDCl<sub>3</sub>) δ: 176.9, 164.9, 150.7, 141.7, 140.7, 139.7, 136.5, 130.0, 128.9, 128.3, 127.3, 127.0, 120.8, 60.9, 49.3, 40.2, 36.5, 36.4, 17.3, 14.2; IR (cm<sup>-1</sup>): 3271.06, 1730.83, 1637.43, 1597.78, 1545.06, 1227.93, 842.63; MS: *m/z* 417.2 (*M*+H<sup>+</sup>), Calcd. for C<sub>26</sub>H<sub>28</sub>N<sub>2</sub>O<sub>3</sub>: C, 74.97; H, 6.78; N, 6.73. Found: C, 75.72; H, 6.99; N, 6.28.

**(2R,4S)-5-([1,1'-Biphenyl]-4-yl)-4-(4-nitrobenzoylamino)-2-methylpentanoicacid ethyl ester (5n).**

Yellow solid, 87% yield; M.P:228-233 °C; <sup>1</sup>H NMR (400 MHz, CDCl<sub>3</sub>) δ: 8.26 (d, *J* = 8.8 Hz, 2H), 7.88 (d, *J* = 8.8 Hz, 2H), 7.57 (q, 4H), 7.43 (t, 2H), 7.33 (t, 1H), 7.27 (t, 2H), 6.58 (d, *J* = 7.8 Hz, 1H), 4.45 (s, 1H), 4.15- 4.07 (m, 2H), 3.07 (dd, 1H), 2.96 (dd, 1H), 2.70- 2.65 (m, 1H), 2.05- 1.98 (m, 1H), 1.82- 1.75 (m, 1H), 1.29- 1.20 (m, 6H); <sup>13</sup>C NMR (75 MHz, CDCl<sub>3</sub>) δ: 176.9, 164.9, 149.5, 140.7, 140.3, 139.6, 136.6, 129.9, 128.8, 128.1, 127.3, 127.2, 127.0, 123.0, 60.9, 49.4, 40.2, 36.5, 36.5, 17.3, 14.2; IR (cm<sup>-1</sup>): 3348.55, 1722.96, 1646.17, 1601.95, 1533.12, 1350.19, 1192.6, 757.38; MS: *m/z* 458.9 (*M*-H<sup>+</sup>), Calcd. for C<sub>27</sub>H<sub>28</sub>N<sub>2</sub>O<sub>5</sub>: C, 70.42; H, 6.13; N, 6.08. Found: C, 69.84; H, 5.79; N, 6.59.

**(2R,4S)-5-([1,1'-Biphenyl]-4-yl)-4-(tetradecanoylamino)-2-methylpentanoicacid ethyl ester (5o).**

Off white solid, 96% yield; M.P: 176-179 °C; <sup>1</sup>H NMR (400 MHz, CDCl<sub>3</sub>) δ: 7.57 (d, *J* = 7.6 Hz, 2H), 7.52 (d, *J* = 8.0 Hz, 2H), 7.43 (t, 2H), 7.33 (t, 1H), 7.24 (d, *J* = 8.0 Hz, 2H), 5.30 (d, *J* = 8.8 Hz, 1H), 4.25 (d, *J* = 4.0 Hz, 1H), 4.13 (q, 2H), 2.85 (d, *J* = 6.3 Hz, 2H), 2.54 (d, *J* = 8.8 Hz, 1H), 2.09 (q, 2H), 1.97- 1.90 (m, 1H), 1.54 (t, 2H), 1.25 (q, 24H), 1.17 (d, *J* = 7.2 Hz, 3H), 0.87 (t, 3H); <sup>13</sup>C NMR (75 MHz, CDCl<sub>3</sub>) δ: 176.5, 172.7, 140.9, 139.4, 136.9, 130.0, 128.8, 127.2, 127.1, 127.0, 60.6, 48.3, 40.5, 37.5, 37.1, 36.6, 32.0, 29.8, 29.7, 29.6, 29.5, 29.4, 29.3, 25.8, 22.8, 17.7, 14.3, 14.2; IR (cm<sup>-1</sup>): 3305.52, 1725.99, 1636.65, 1533.99, 1488.02, 1439.08, 1375.20, 1311.43, 1161.01, 759.94, 609.20; MS: *m/z* 522.3 (*M*+H<sup>+</sup>), Calcd. for C<sub>34</sub>H<sub>51</sub>NO<sub>3</sub>: C, 78.26; H, 9.85; N, 2.68. Found: C, 77.21; H, 9.24; N, 3.12.

**(2R,4S)-5-([1,1'-Biphenyl]-4-yl)-4-(1-(tert-butoxycarbonyl)piperidine-4-carboxylamino)-2-methylpentanoic acid ethyl ester (5p).**

Off white solid, 92% yield; M.P: 204-208 °C; <sup>1</sup>H NMR (400 MHz, CDCl<sub>3</sub>) δ: 8.01 (s, 1H), 7.96 (d, *J*=8.4 Hz, 2H), 7.55 (t, 2H), 7.44 (t, 2H), 7.34 (t, 1H), 7.31-7.26 (m, 1H), 5.72 (d, *J*=5.6 Hz, 1H), 4.23 (s, 1H), 4.13 (q, 4H), 3.05 (dd, 2H), 2.92 (dd, 2H), 2.69- 2.64 (m, 1H), 2.34 (s, 3H), 2.11- 2.04 (m, 3H), 1.73- 1.66 (m, 6H), 1.39 (s, 9H); <sup>13</sup>C NMR (75 MHz, CDCl<sub>3</sub>) δ: 176.5, 173.8, 154.7, 140.8, 139.5, 136.8, 130.0, 128.8, 127.3, 127.1, 127.0, 79.7, 60.7, 48.3, 43.5, 40.5, 37.3, 36.6, 28.7, 28.6, 28.5, 17.6, 14.3; IR (cm<sup>-1</sup>): 2973.48, 1729.10, 1690.56, 1534.42, 1486.57, 1161.35, 760.68; MS: *m/z* 523.2 (*M*+H<sup>+</sup>), Calcd. for C<sub>31</sub>H<sub>42</sub>N<sub>2</sub>O<sub>5</sub>: C, 71.24; H, 8.10; N, 5.36. Found: C, 72.09; H, 8.47; N, 5.16.

**(2R,4S)-5-([1,1'-Biphenyl]-4-yl)-4-(cyclopropanecarboxylamino)-2-methylpentanoic acid ethyl ester (5q).**

Off white solid, 88% yield; M.P:187-192 °C; <sup>1</sup>H NMR (400 MHz, CDCl<sub>3</sub>) δ: 7.59 (t, 2H), 7.53 (d, *J* = 8.4 Hz, 2H), 7.43 (t, 2H), 7.33 (t, 1H), 7.25 (d, *J* = 6.8 Hz, 2H), 5.54 (d, *J* = 8.4 Hz, 1H), 4.26 (q, 1H), 4.14 (q, 2H), 2.92- 2.80 (m, 2H), 2.61- 2.56 (m, 1H), 1.97- 1.90 (m, 1H),

1.59- 1.52 (m, 1H), 1.27- 1.22 (m, 4H), 1.16 (d,  $J = 7.2$  Hz, 3H), 0.95- 0.90 (m, 2H) 0.71 (q, 2H);  $^{13}\text{C}$  NMR (75 MHz,  $\text{CDCl}_3$ )  $\delta$ : 176.5, 173.0, 140.9, 139.3, 136.9, 130.0, 128.8, 127.2, 127.1, 127.0, 60.6, 48.6, 40.5, 37.3, 36.5, 17.6, 14.8, 14.2, 7.0, 6.9; IR ( $\text{cm}^{-1}$ ): 3313.72, 1637.24, 1529.19, 1486.21, 1441.99, 133.93, 1120.39, 762.28; MS:  $m/z$  380.1 ( $M+\text{H}^+$ ), Calcd. for  $\text{C}_{24}\text{H}_{29}\text{NO}_3$ : C, 75.96; H, 7.70; N, 3.69. Found: C, 76.59; H, 7.43; N, 3.47.

**(2R,4S)-5-([1,1'-Biphenyl]-4-yl)-4-(cyclopentanecarboxoylamino)-2-methylpentanoic acid ethyl ester(5r).**

Off white solid, 91% yield; M.P:197-200 °C;  $^1\text{H}$  NMR (400 MHz,  $\text{CDCl}_3$ )  $\delta$ : 7.57 (d,  $J = 7.2$  Hz, 2H), 7.51 (d,  $J = 7.6$  Hz, 2H), 7.43 (t, 2H), 7.33 (m, 1H), 5.33 (d,  $J = 8.8$  Hz, 2H), 4.26-4.20 (m, 1H), 4.14 (q, 2H), 2.85 (d,  $J = 6.4$  Hz, 2H), 2.56 (q, 1H), 2.40 (q, 1H), 1.96- 1.89 (m, 1H), 1.78- 1.64 (m, 5H), 1.59- 1.52 (m, 4H), 1.24 (t, 3H), 1.17 (d,  $J = 6.8$  Hz, 3H);  $^{13}\text{C}$  NMR (75 MHz,  $\text{CDCl}_3$ )  $\delta$ : 176.5, 175.7, 140.9, 139.4, 137.0, 130.0, 128.8, 127.2, 127.1, 127.0, 60.6, 48.3, 46.1, 40.5, 37.5, 36.6, 30.5, 30.3, 26.0, 25.9, 17.6, 14.3; IR ( $\text{cm}^{-1}$ ): 3281.80, 3082.60, 1729.31, 1638.38, 1554.88, 1487.39, 1447.09, 1368.69, 1170.49, 694.79; MS:  $m/z$  408.2 ( $M+\text{H}^+$ ), Calcd. for  $\text{C}_{26}\text{H}_{33}\text{NO}_3$ : C, 76.62; H, 8.16; N, 3.44. Found: C, 76.15; H, 8.49; N, 3.06.

**(2R,4S)-5-([1,1'-Biphenyl]-4-yl)-4-(2-chloro-5-nitrobenzoylamino)-2-methylpentanoic acid ethyl ester (5s).**

Pale yellow solid, 83% yield; M.P:235-239 °C;  $^1\text{H}$  NMR (400 MHz,  $\text{CDCl}_3$ )  $\delta$ : 8.29 (d,  $J = 2.4$  Hz, 1H), 8.18 (dd, 1H), 7.59- 7.54 (m, 5H), 7.43 (t, 2H), 7.35-7.26 (m, 3H), 6.07 (d,  $J = 8.8$  Hz, 1H), 4.49 (d,  $J = 3.2$  Hz, 1H), 4.17 (q, 2H), 3.01 (t, 2H), 2.69 (q, 1H), 2.06 (t, 1H), 1.73 (t, 1H), 1.27- 1.23 (m, 6H);  $^{13}\text{C}$  NMR (300 MHz,  $\text{CDCl}_3$ )  $\delta$ : 176.3, 164.1, 146.3, 140.7, 139.7, 137.7, 137.0, 136.4, 131.3, 129.9, 128.8, 127.3, 127.0, 125.4, 124.5, 60.8, 49.8, 40.5, 37.5, 36.5, 17.8, 14.2; IR ( $\text{cm}^{-1}$ ): 3300.79, 1727.50, 1644.88, 1609.53, 1526.299, 1486.75,

1464.77, 1345.87, 1281.49, 763.48; MS:  $m/z$  494.9 ( $M+H^+$ ), Calcd. for  $C_{27}H_{27}ClN_2O_5$ : C, 65.52; H, 5.50; N, 5.66. Found: C, 66.20; H, 5.96; N, 5.14.

**(2R,4S)-5-([1,1'-Biphenyl]-4-yl)-4-(2-methyl-4-nitrobenzoylamino)-2-methylpentanoic acid ethyl ester (5t).**

Pale yellow solid, 92% yield; M.P: 217-221 °C;  $^1H$  NMR (400 MHz,  $CDCl_3$ )  $\delta$ : 8.01 (t, 2H), 7.56 (t, 4H), 7.44 (t, 2H), 7.35 (d,  $J = 7.2$  Hz, 1H), 7.29 (t, 3H), 5.70 (d,  $J = 8.7$  Hz, 1H), 4.51 (m, 1H), 4.14 (q, 2H), 3.04 (q, 1H), 2.90 (q, 1H), 2.66 (s, 1H), 2.35 (s, 3H), 2.06 (d,  $J = 9.6$  Hz, 1H), 1.71 (m, 1H), 1.26- 1.23 (m, 6H);  $^{13}C$  NMR (75 MHz,  $CDCl_3$ )  $\delta$ : 176.3, 167.7, 148.1, 142.6, 140.7, 139.7, 138.2, 136.6, 129.8, 128.9, 127.3, 127.2, 127.0, 125.5, 120.9, 60.8, 49.0, 40.8, 37.9, 36.7, 19.4, 17.8, 14.2 ; IR ( $cm^{-1}$ ): 3288.67, 1725.63, 1638.37, 1605.7, 1521.52, 1485.97, 1379.27, 1178.38, 761.97, 609.76; MS:  $m/z$  475.3 ( $M+H^+$ ), Calcd. for  $C_{28}H_{30}N_2O_5$ : C, 70.87; H, 6.37; N, 5.90. Found: C, 71.67; H, 6.81; N, 5.38.

**(2R,4S)-5-([1,1'-Biphenyl]-4-yl)-4-(4-(cyanomethyl)benzoylamino)-2-methylpentanoic acid ethyl ester (5u).**

Off white solid, 95% yield; M.P: 184-188 °C;  $^1H$  NMR (400 MHz,  $CDCl_3$ )  $\delta$ : 7.73 (d,  $J = 8.0$  Hz, 2H), 7.55 (q, 4H), 7.45- 7.37 (m, 4H), 7.33 (t, 1H), 7.27 (t, 2H), 6.31 (d,  $J = 8.4$  Hz, 1H), 4.45 (s, 1H), 4.14- 4.05 (m, 2H), 3.79 (s, 2H), 3.05 (dd, 1H), 2.94 (q, 1H), 2.66 (q, 1H), 2.05- 1.98 (m, 1H), 1.78- 1.71 (m, 1H), 1.21 (q, 6H);  $^{13}C$  NMR (75 MHz,  $CDCl_3$ )  $\delta$ : 176.8, 166.0, 140.8, 139.6, 136.8, 134.6, 133.3, 130.0, 128.8, 128.2, 127.8, 127.3, 127.2, 127.0, 117.3, 60.8, 49.1, 40.3, 36.7, 36.6, 23.6, 17.4, 14.2; IR ( $cm^{-1}$ ): 3340.227, 2252.17, 1722.04, 1632.87, 1527.09, 1463.57, 1333.48, 752.12, 620.04; MS:  $m/z$  454.2 ( $M+H^+$ ), Calcd. for  $C_{29}H_{30}N_2O_3$ : C, 76.63; H, 6.65; N, 6.16. Found: C, 75.95; H, 6.34; N, 6.84.

**(2R,4S)-5-([1,1'-Biphenyl]-4-yl)-4-(2-amino-4-chlorobenzoylamino)-2-methylpentanoic acid ethyl ester (5v).**

Off white solid, 87% yield; M.P:195-198 °C; <sup>1</sup>H NMR (400 MHz, CDCl<sub>3</sub>) δ: 7.55 (q, 4H), 7.43 (t, 2H), 7.33 (t, 1H), 7.27 (d, *J* = 8.4 Hz, 2H), 7.10 (d, *J* = 8.8 Hz, 1H), 6.64 (d, 1H), 6.57 (dd, 1H), 5.59 (s, 1H), 5.60 (s, 2H), 4.42 (t, 1H), 4.13- 4.07 (m, 2H), 2.95 (t, 2H), 2.62 (q, 1H), 2.04- 1.97 (m, 1H), 1.71- 1.64 (m, 1H), 1.25- 1.18 (m, 6H); <sup>13</sup>C NMR (75 MHz, CDCl<sub>3</sub>) δ: 176.6, 168.1, 149.8, 140.8, 139.5, 137.9, 136.8, 130.0, 128.8, 128.3, 127.2, 127.2, 127.0, 116.6, 116.5, 114.5, 60.7, 48.5, 40.5, 37.1, 36.5, 17.5, 14.2; IR (cm<sup>-1</sup>): 3473.43, 3365.16, 1712.24, 1629.80, 1611.19, 1512.37, 1370.01, 1257.09, 1214.50, 870.61, 698.53; MS: *m/z* 465.1 (*M*+*H*<sup>+</sup>), Calcd. for C<sub>27</sub>H<sub>29</sub>ClN<sub>2</sub>O<sub>3</sub>: C, 69.74; H, 6.29; N, 6.02. Found: C, 69.53; H, 6.10; N, 6.38.

*In-vitro* antimycobacterial activity:

Briefly, the inoculum was prepared from fresh LJ medium re-suspended in 7H9-S medium (7H9 broth, 0.1% casitone, 0.5% glycerol, supplemented oleic acid, albumin, dextrose, and catalase [OADC]), adjusted to a OD<sub>590</sub> 1.0, and diluted 1:20; 100 µl was used as inoculum. Each drug stock solution was thawed and diluted in 7H9-S at four-fold the final highest concentration tested. Serial two-fold dilutions of each drug were prepared directly in a sterile 96-well microtiter plate using 100 µl 7H9-S. A growth control containing no antibiotic and a sterile control were also prepared on each plate. Sterile water was added to all perimetre wells to avoid evaporation during the incubation. The plate was covered, sealed in plastic bags and incubated at 37 °C in normal atmosphere. After 7 days incubation, 30 µl of alamar blue solution was added to each well, and the plate was re-incubated overnight. A change in colour from blue (oxidised state) to pink (reduced) indicated the growth of bacteria, and the MIC was defined as the lowest concentration of drug that prevented this change in colour.

### X-ray Crystallography.

X-ray data for the compound 5n was collected at room temperature on a Bruker D8 QUEST instrument with an I $\mu$ S Mo microsource ( $\lambda = 0.7107$  Å) and a PHOTON-100 detector. The raw data frames were reduced and corrected for absorption effects using the Bruker Apex 3 software suite programs [1]. The structure was solved using intrinsic phasing method [2] and further refined with the SHELXL [2] program and expanded using Fourier techniques. Anisotropic displacement parameters were included for all non-hydrogen atoms. All H atoms were positioned geometrically and treated as riding on their parent C atoms [C-H = 0.93-0.97 Å, and  $U_{\text{iso}}(\text{H}) = 1.5U_{\text{eq}}(\text{C})$  for methyl H or  $1.2U_{\text{eq}}(\text{C})$  for other H atoms].

1. Bruker (2016). APEX3, SAINT and SADABS. Bruker AXS, Inc., Madison, Wisconsin, USA.
2. Sheldrick G. M. (2015) Acta Crystallogr C 71:3-8.

Table S1. Crystal data and structure refinement parameters for compound, 5n.

| Parameters                                          | 5n                                                                 |
|-----------------------------------------------------|--------------------------------------------------------------------|
| Empirical Formula                                   | C <sub>27</sub> H <sub>28</sub> N <sub>2</sub> O <sub>5</sub>      |
| Crystal system                                      | Monoclinic                                                         |
| Space group                                         | <i>P2<sub>1</sub></i>                                              |
| Crystal size (mm)                                   | 0.32 × 0.28 × 0.19                                                 |
| <i>a</i> (Å)                                        | 9.2869(2)                                                          |
| <i>b</i> (Å)                                        | 5.3667(1)                                                          |
| <i>c</i> (Å)                                        | 23.7254(4)                                                         |
| $\alpha$ (°)                                        | 90                                                                 |
| $\beta$ (°)                                         | 93.0970(8)                                                         |
| $\gamma$ (°)                                        | 90                                                                 |
| Volume (Å <sup>3</sup> )                            | 2134.7(5)                                                          |
| <i>Z</i>                                            | 2                                                                  |
| Formula mass                                        | 460.51                                                             |
| $\rho_{\text{calc}}$ (gcm <sup>-3</sup> )           | 1.295                                                              |
| $\lambda$ Å                                         | 0.71073 (MoK $\alpha$ )                                            |
| $\mu$ (mm <sup>-1</sup> )                           | 0.090                                                              |
| $\theta$ range (°)                                  | 2.196 to 30.633                                                    |
| Total data collected                                | 32089                                                              |
| Unique data                                         | 7239                                                               |
| Observed data ( <i>I</i> > 2 $\sigma$ ( <i>I</i> )) | 4714                                                               |
| R indexes [ <i>I</i> > 2 $\sigma$ ( <i>I</i> )]     | <i>R</i> <sub>1</sub> = 0.0541,<br><i>wR</i> <sub>2</sub> = 0.1242 |
| Goodness of fit                                     | 1.027                                                              |



# <sup>1</sup>H NMR Spectrum of compound 5a

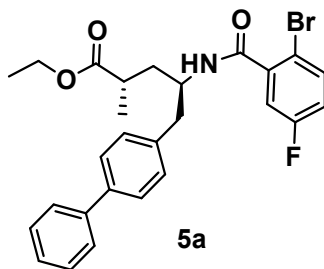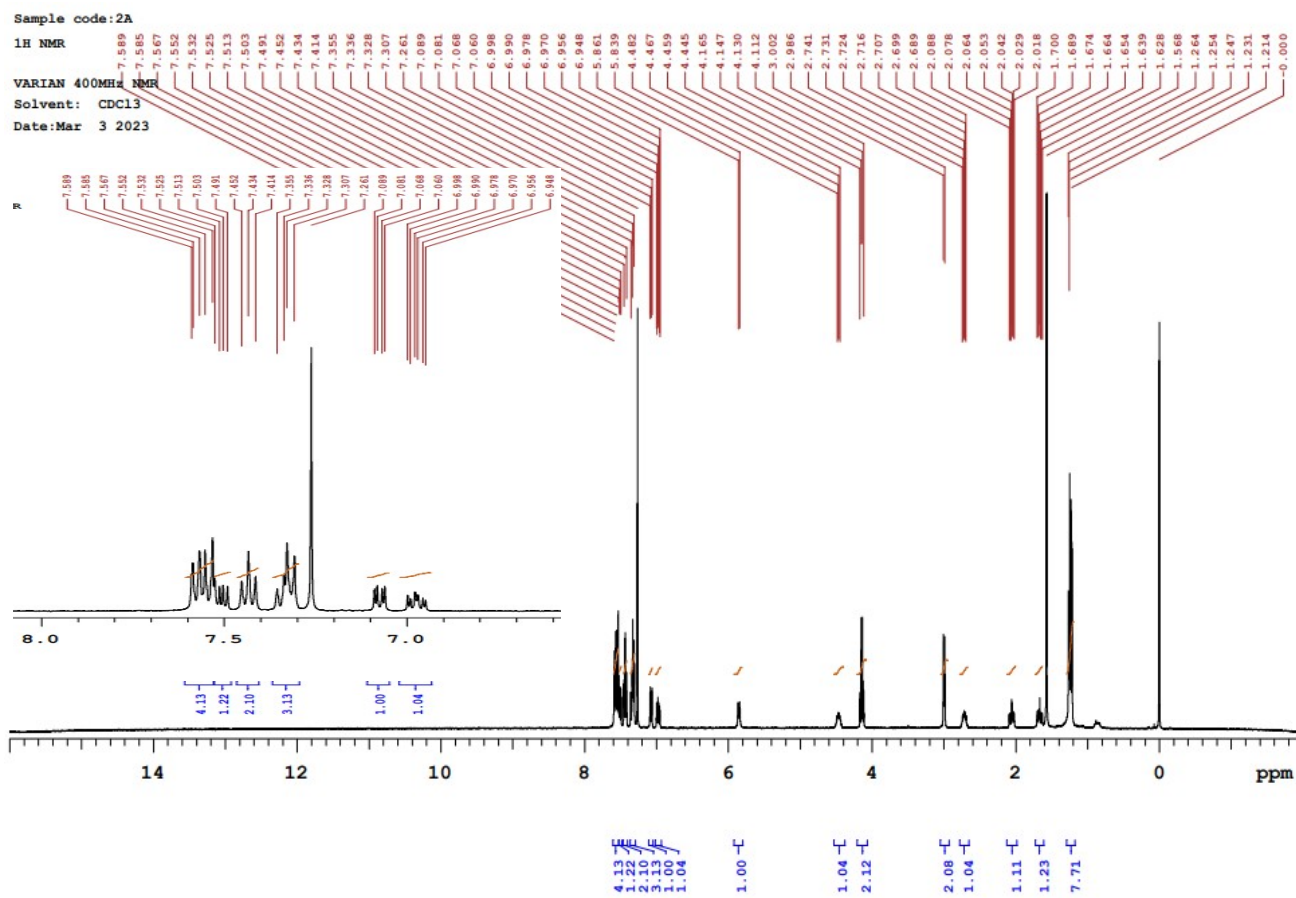

Figure S1: <sup>1</sup>H-NMR (400 MHz, CDCl<sub>3</sub>) spectrum of compound, 5a.

<sup>13</sup>C NMR Spectrum of compound 5a

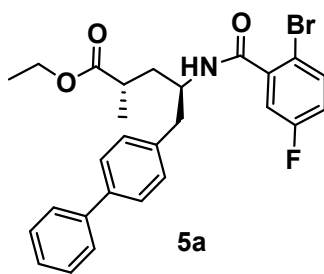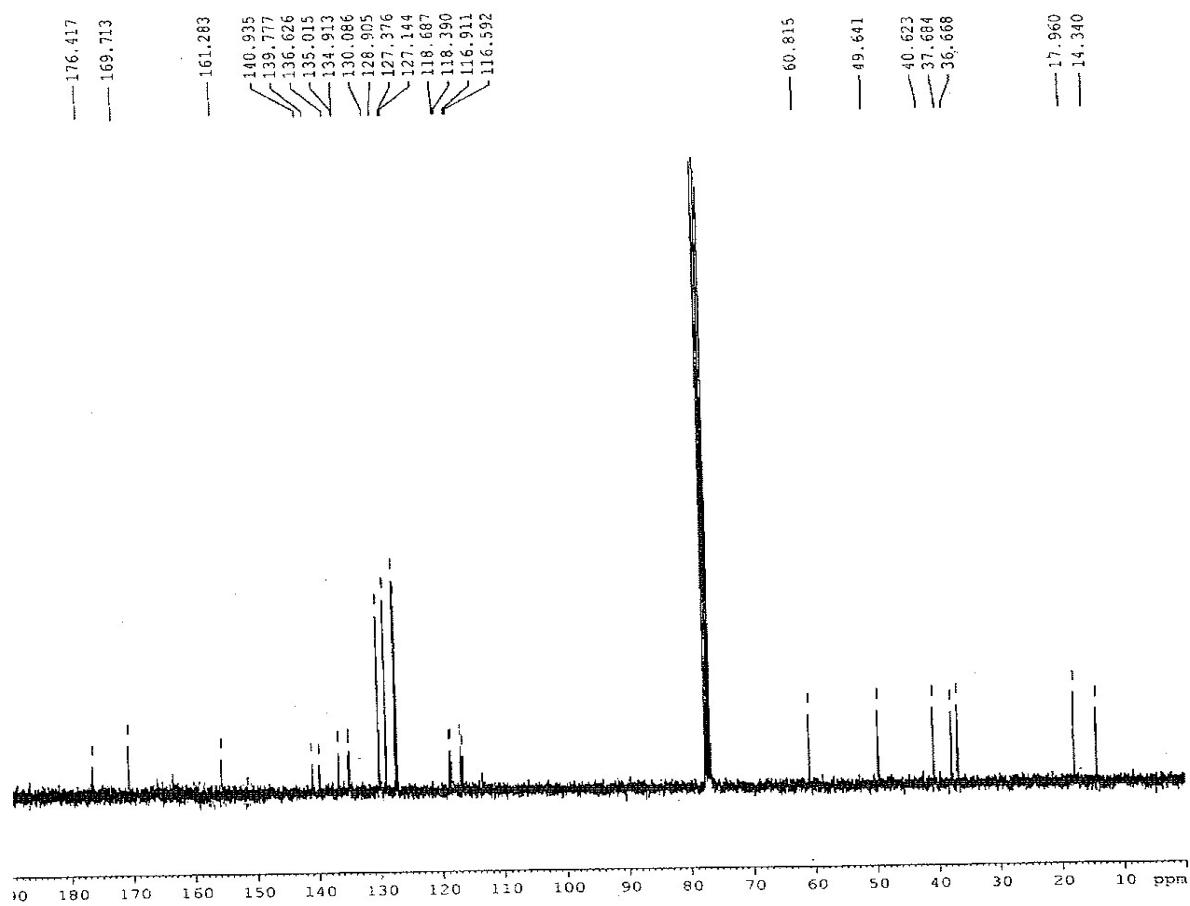

Figure S2: <sup>13</sup>C-NMR (75MHz, CDCl<sub>3</sub>) spectrum of compound, 5a.

Mass spectrum of compound 5a

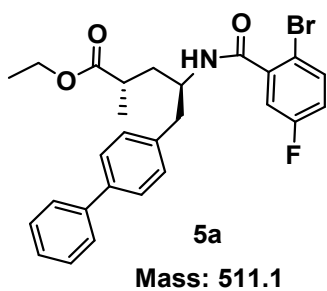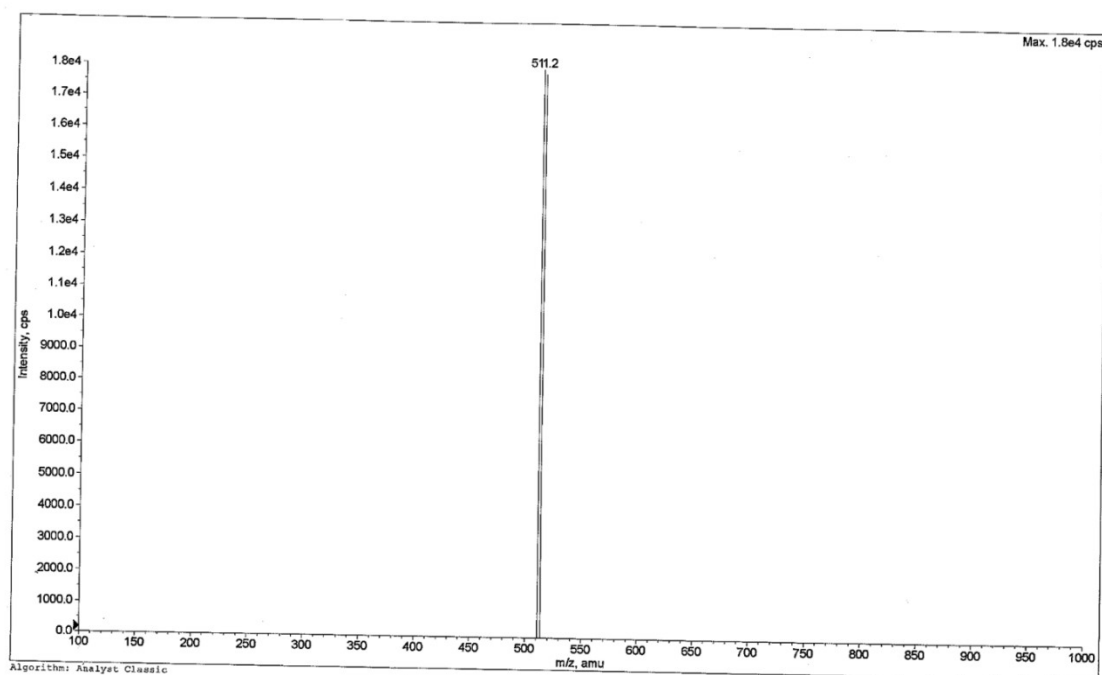

Figure S3: ESI Mass (M+H) spectrum of compound, 5a.

# <sup>1</sup>H NMR Spectrum of compound 5b

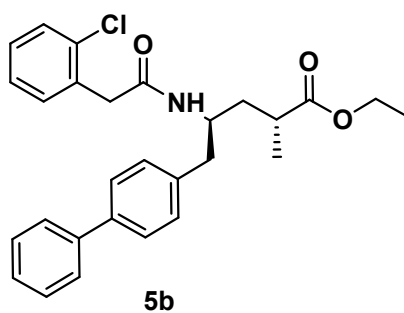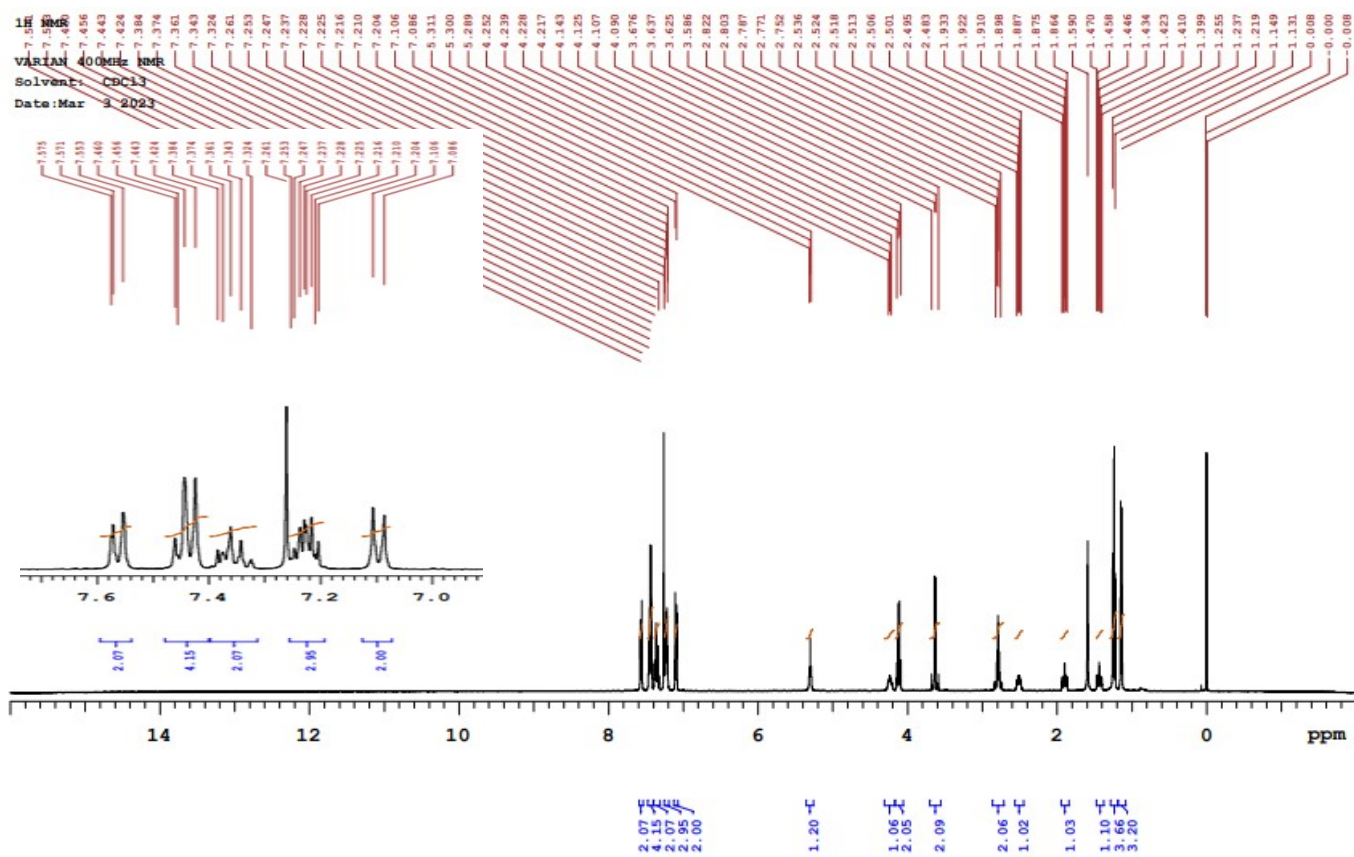

Figure S4: <sup>1</sup>H-NMR (400 MHz, CDCl<sub>3</sub>) spectrum of compound, 5b.

<sup>13</sup>C NMR Spectrum of compound 5b

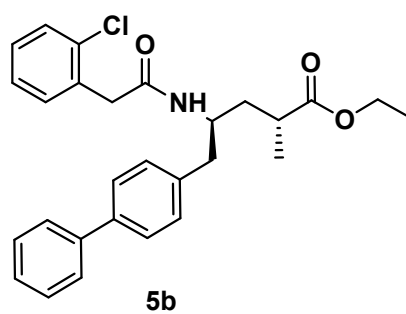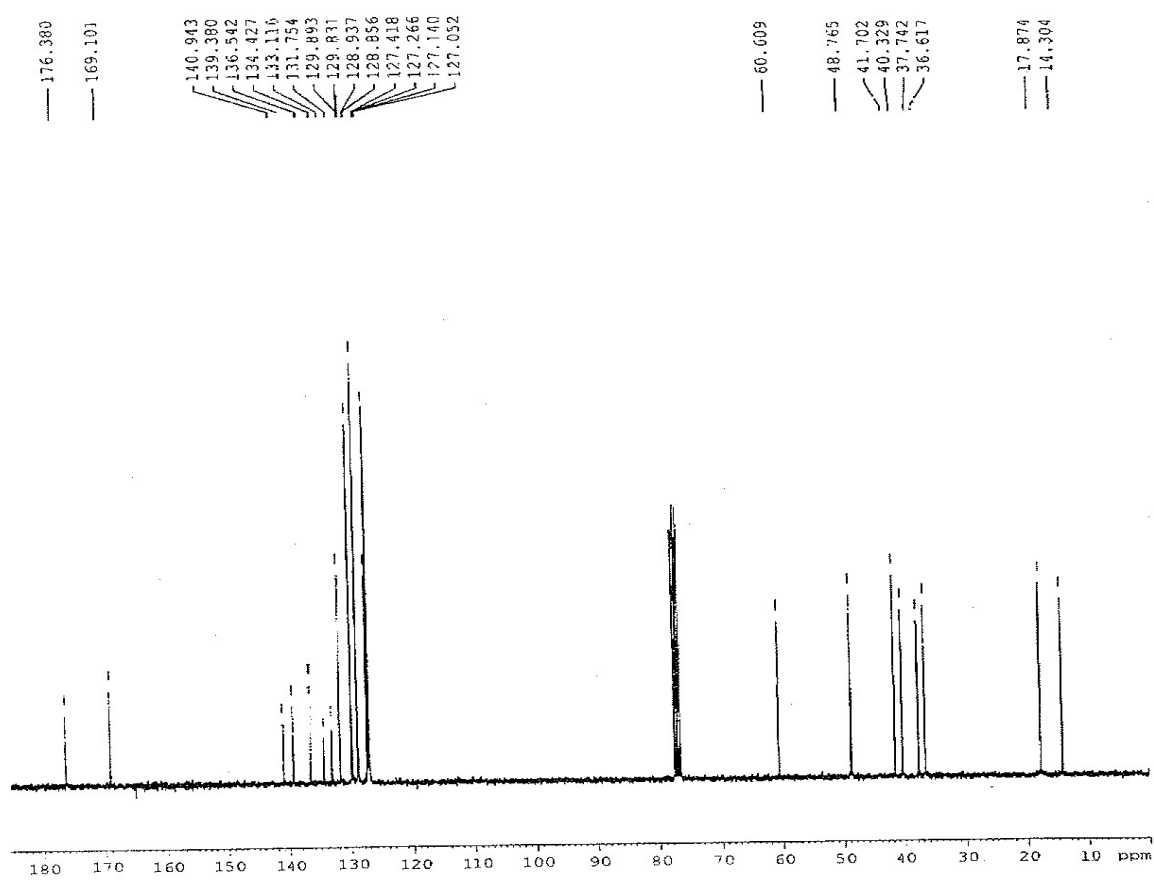

Figure S5: <sup>13</sup>C-NMR (75 MHz, CDCl<sub>3</sub>) spectrum of compound, 5b.

Mass spectrum of compound 5b

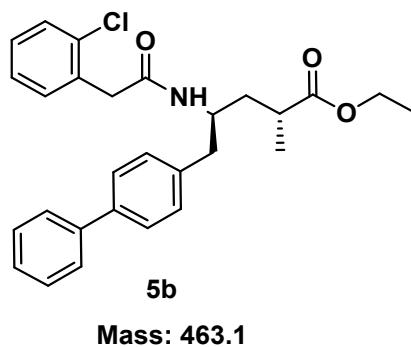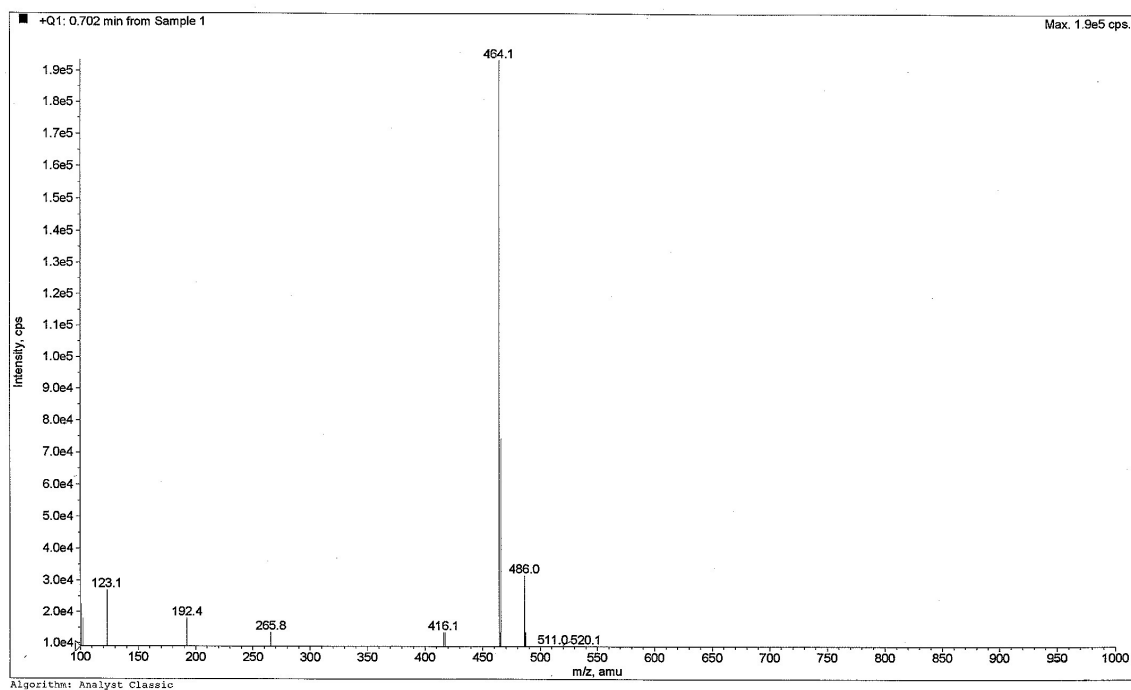

Figure S6: ESI Mass ( $M+H^+$ ) spectrum of compound, 5b.

<sup>1</sup>H NMR Spectrum of compound 5c

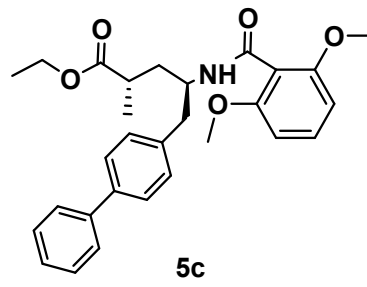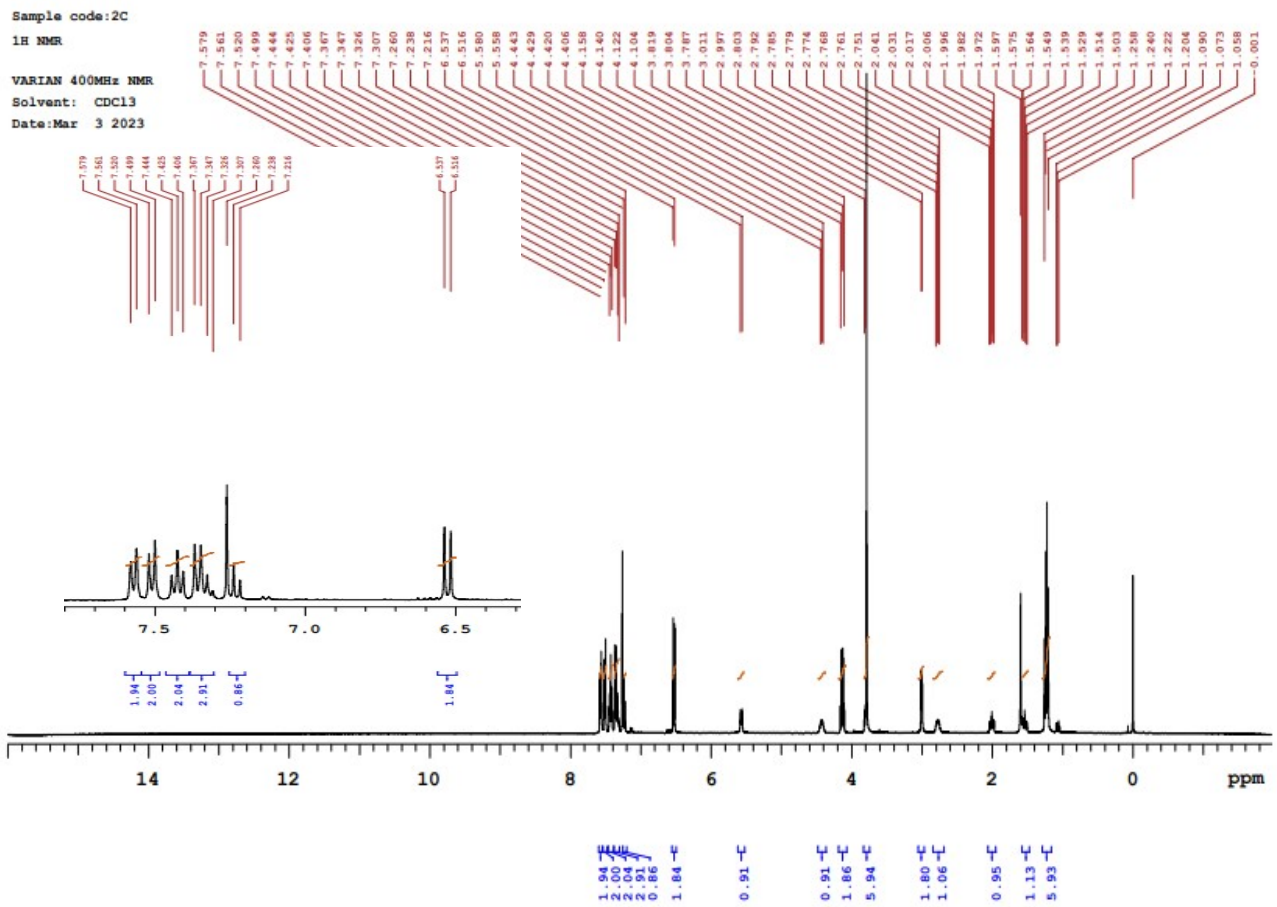

Figure S7: <sup>1</sup>H-NMR (400 MHz, CDCl<sub>3</sub>) spectrum of compound, 5c.

<sup>13</sup>C NMR Spectrum of compound 5c

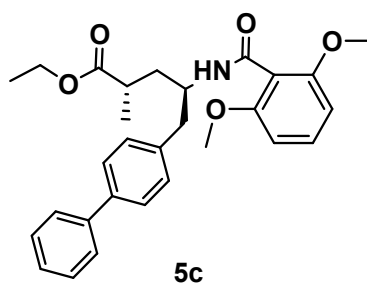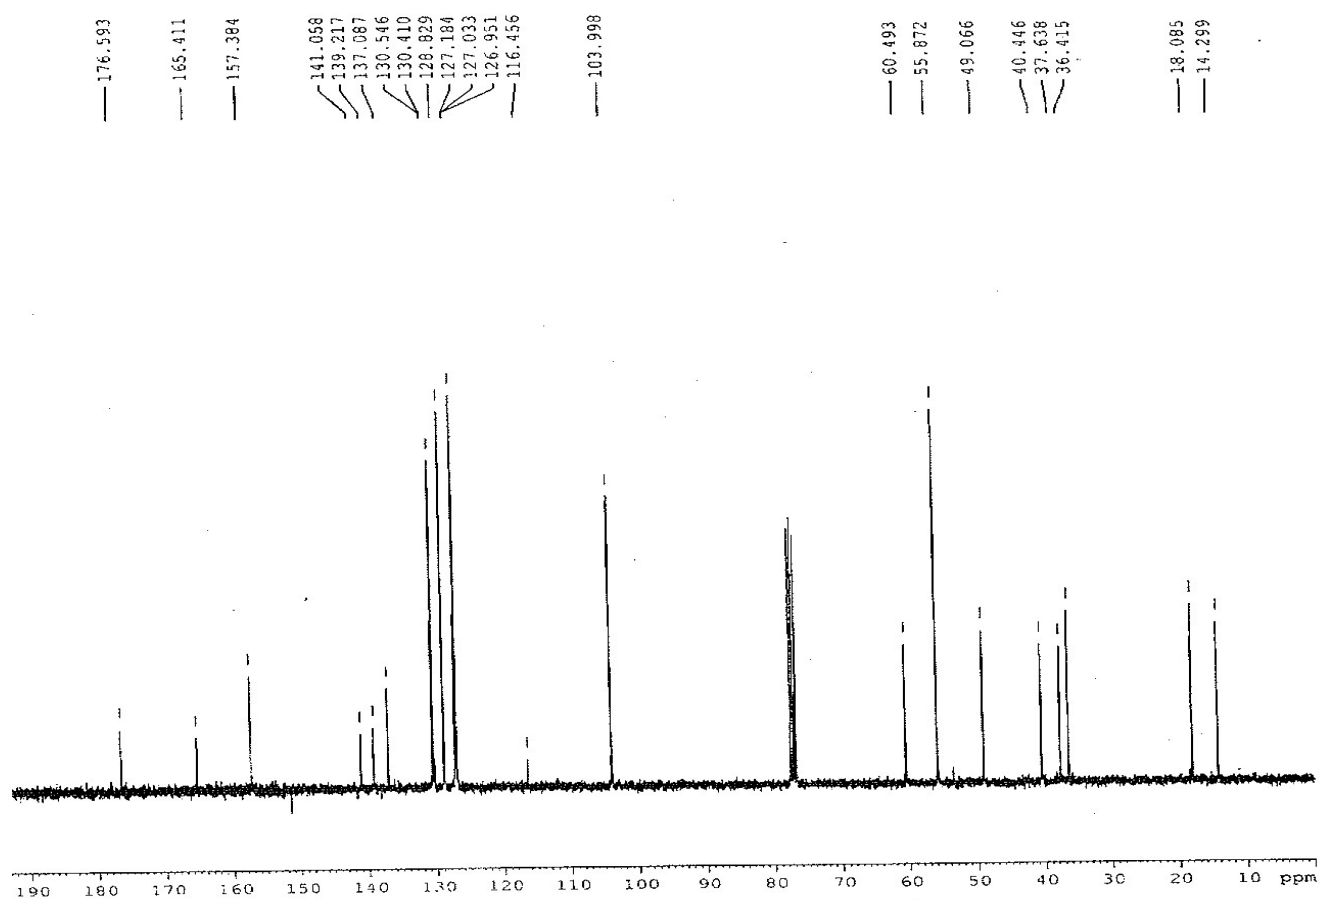

Figure S8: <sup>13</sup>C-NMR (75 MHz, CDCl<sub>3</sub>) spectrum of compound, 5c.



Mass spectrum of compound 5c

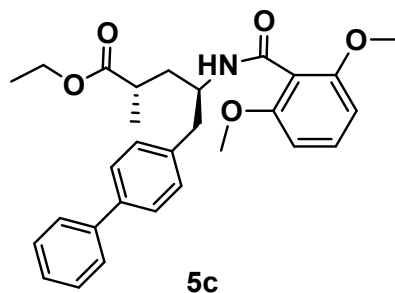

Mass: 475.2

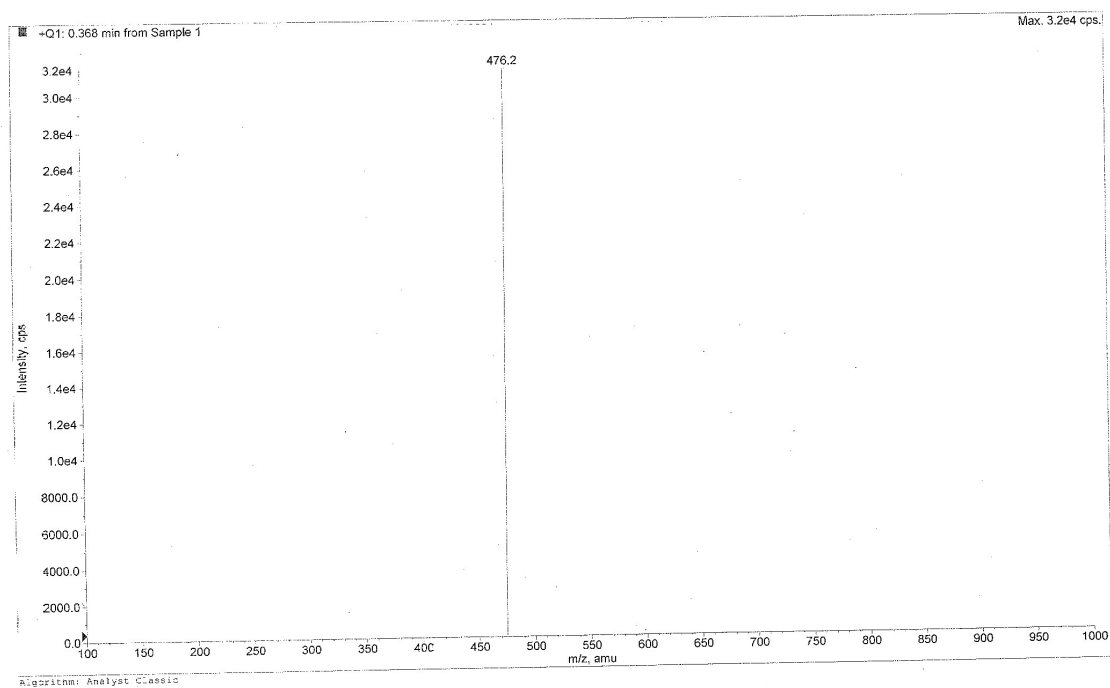

Figure S9: ESI Mass ( $M+H^+$ ) spectrum of compound, 5c.

# <sup>1</sup>H NMR Spectrum of compound 5d

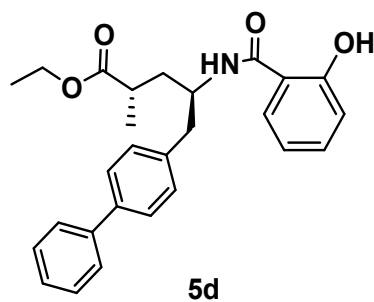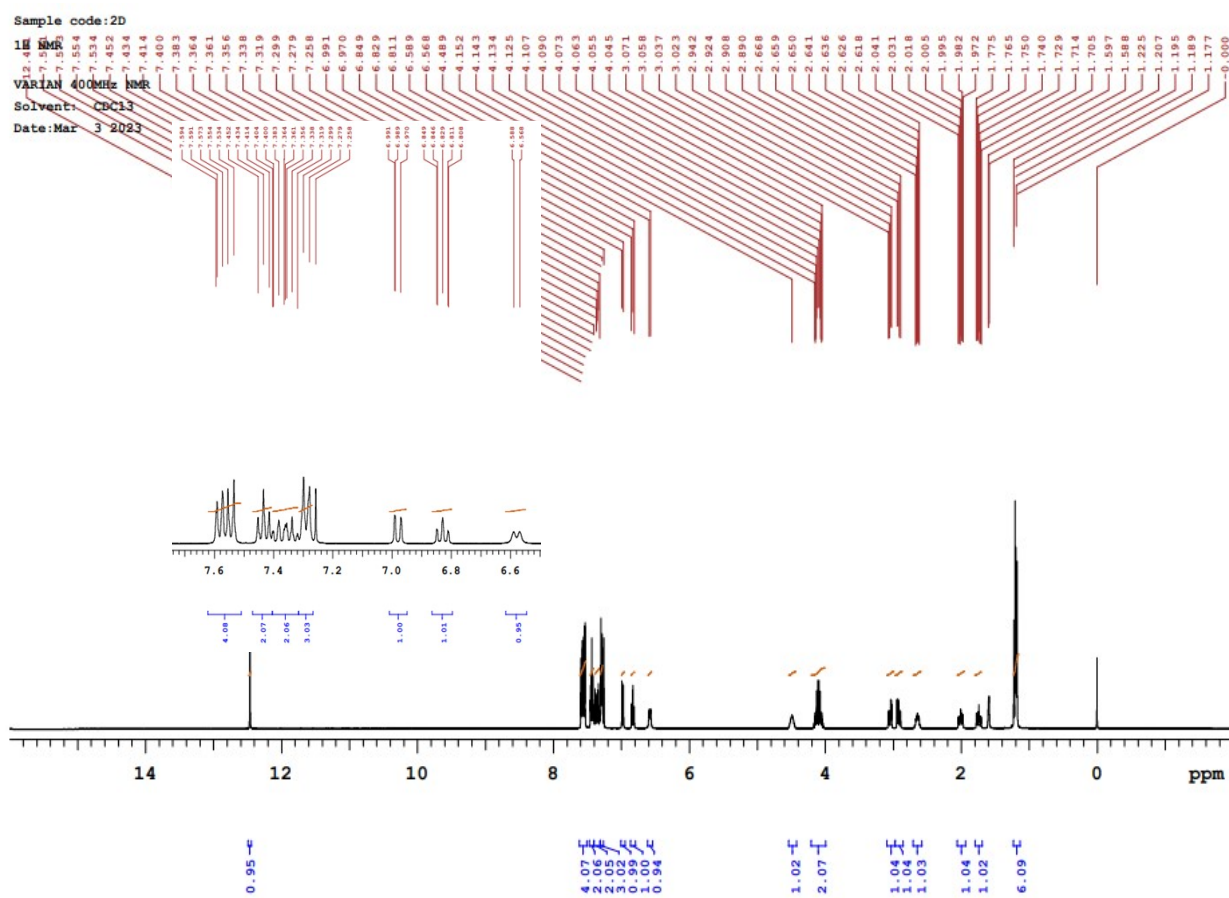

Figure S10: <sup>1</sup>H-NMR (400 MHz, CDCl<sub>3</sub>) spectrum of compound, 5d.

<sup>13</sup>C NMR Spectrum of compound 5d

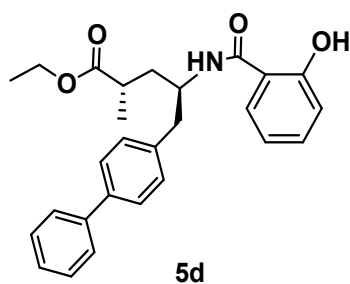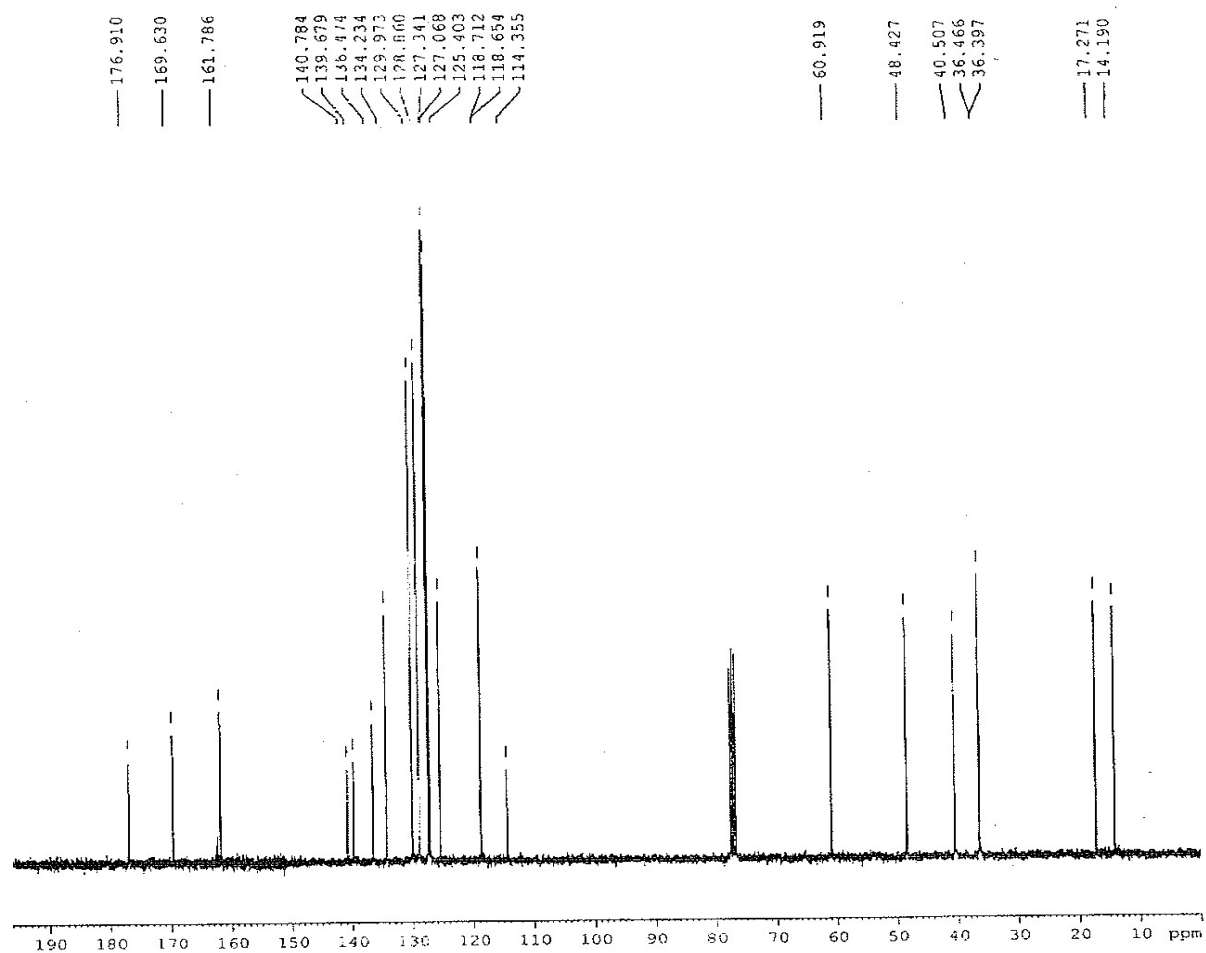

Figure S11: <sup>13</sup>C-NMR (75 MHz, CDCl<sub>3</sub>) spectrum of compound, 5d.

Mass spectrum of compound 5d

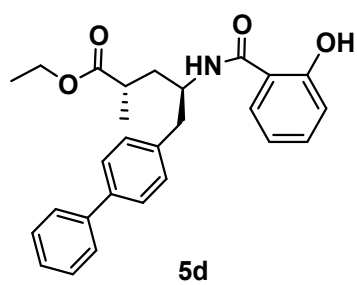

Mass: 431.2

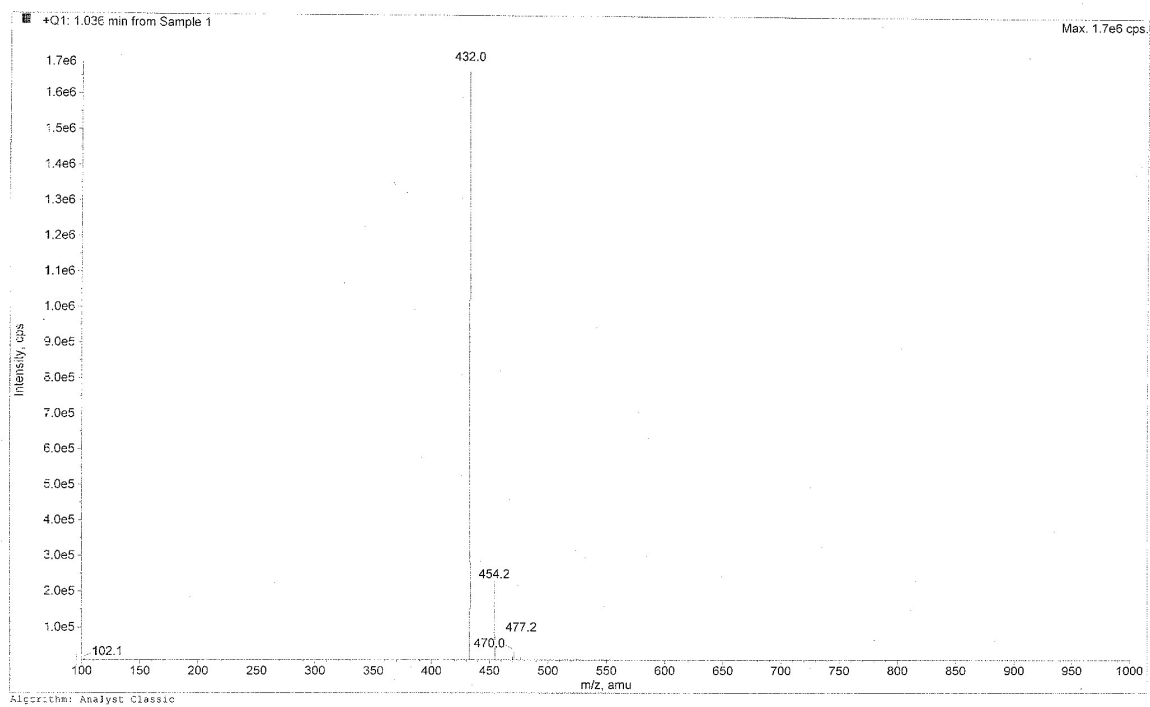

Figure S12: ESI Mass ( $M+H^+$ ) spectrum of compound, 5d.

<sup>1</sup>H NMR Spectrum of compound 5e

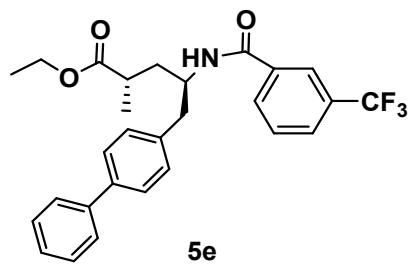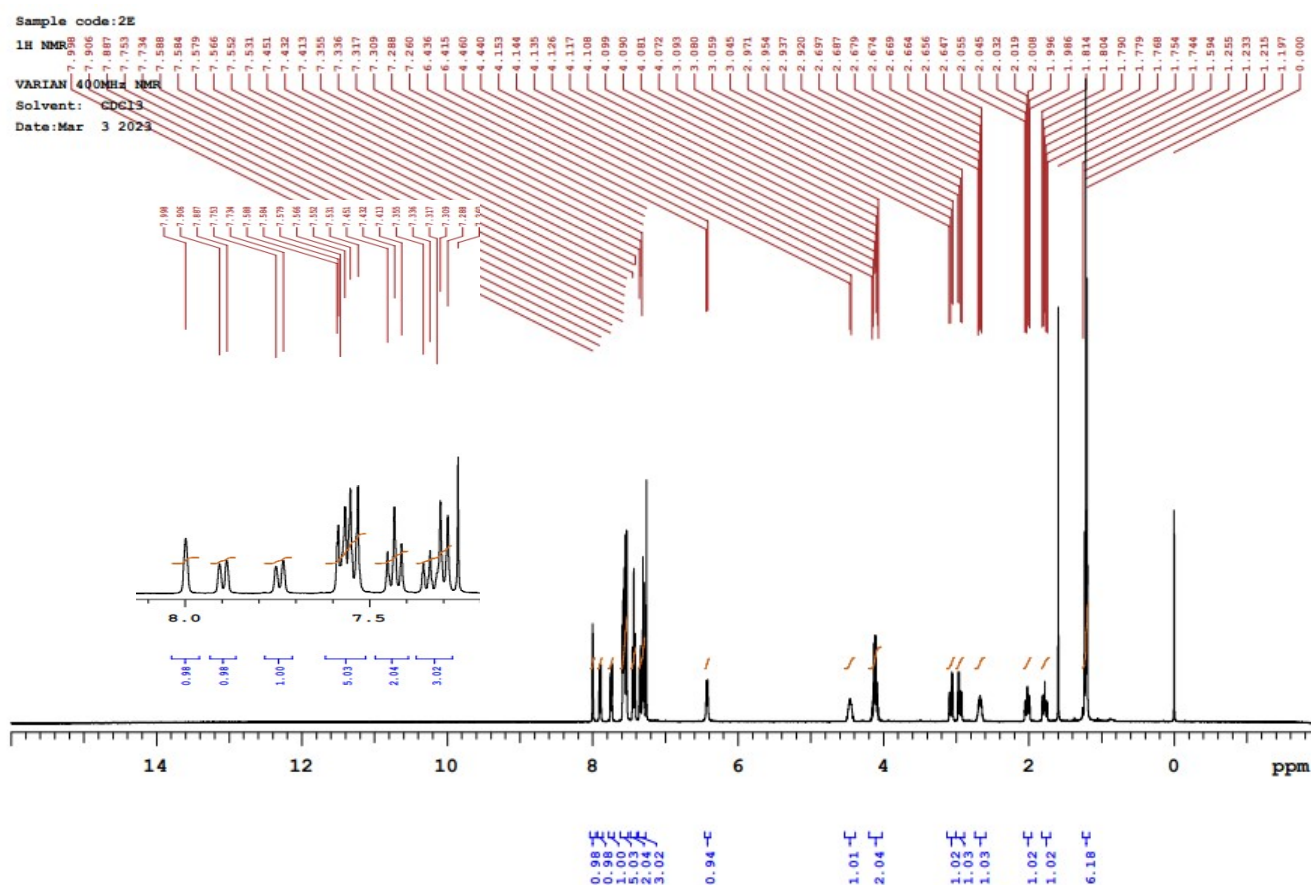

Figure S13: <sup>1</sup>H-NMR (400 MHz, CDCl<sub>3</sub>) spectrum of compound, 5e.

<sup>13</sup>C NMR Spectrum of compound 5e

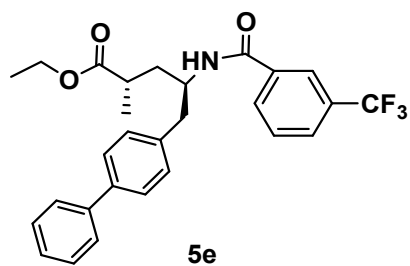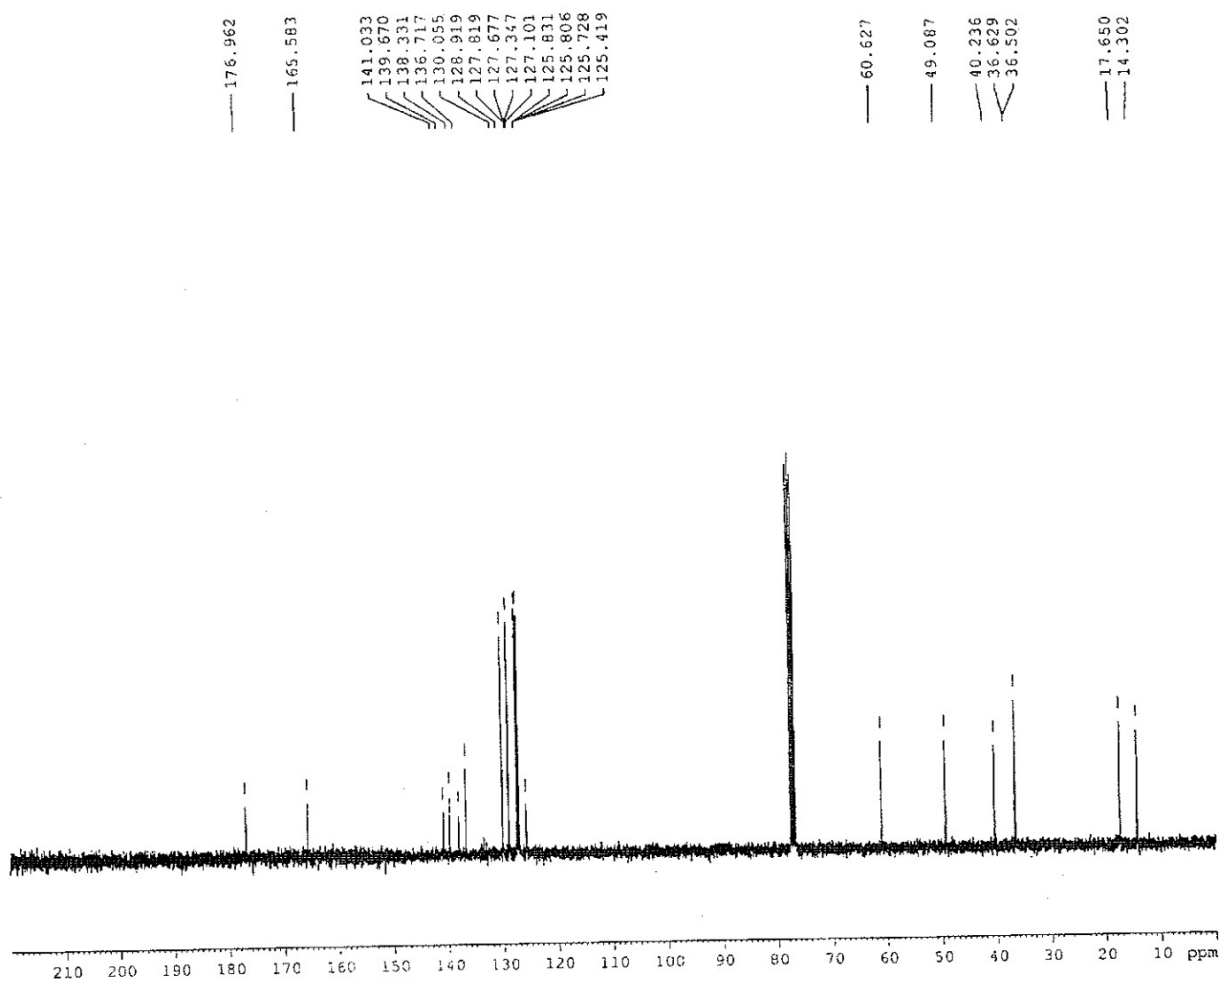

Figure S14: <sup>13</sup>C-NMR (75 MHz, CDCl<sub>3</sub>) spectrum of compound, 5e.

Mass spectrum of compound 5e

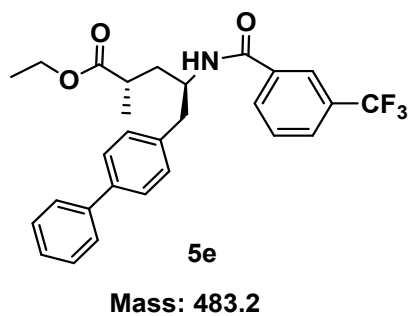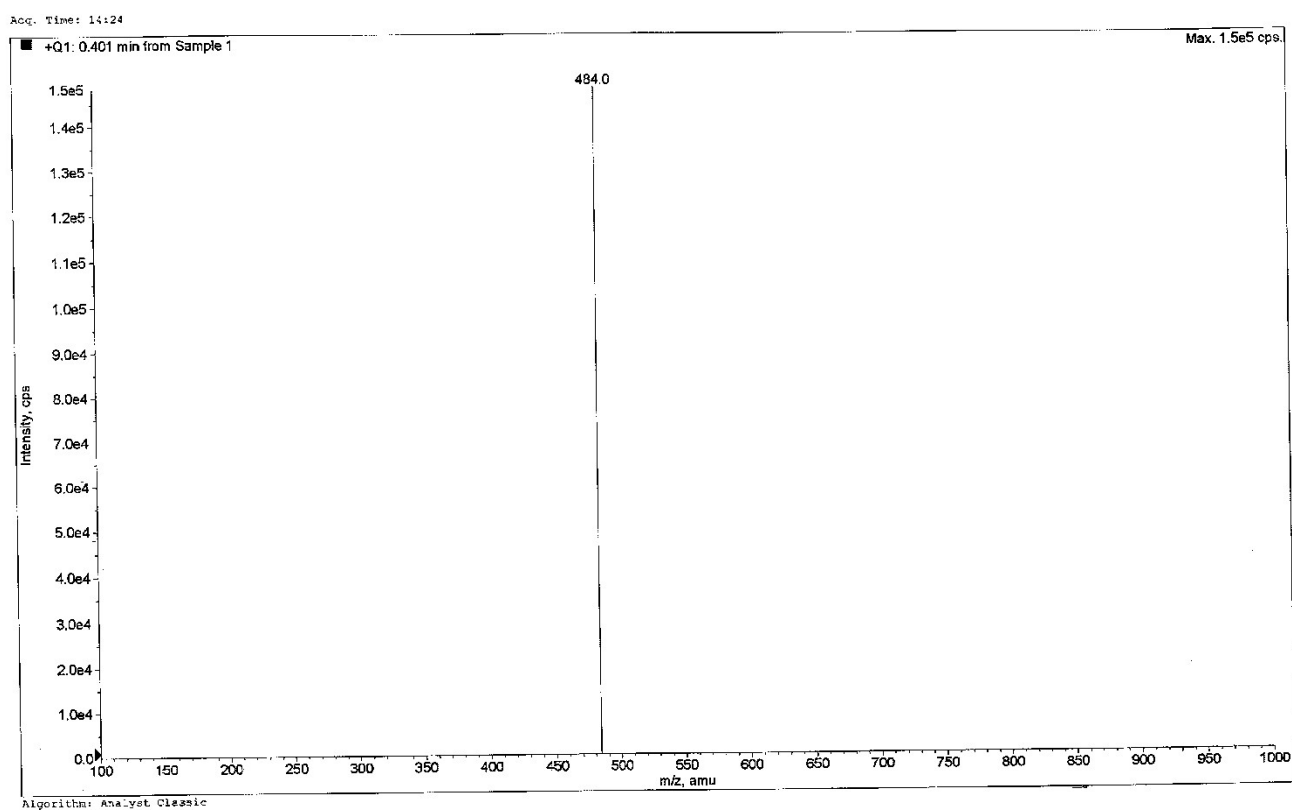

Figure S15: ESI Mass ( $M+H^+$ ) spectrum of compound, 5e.

# <sup>1</sup>H NMR Spectrum of compound 5f

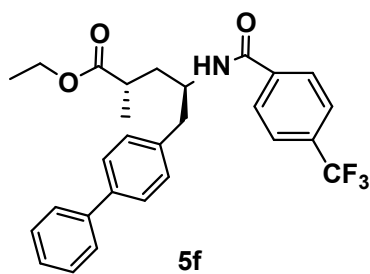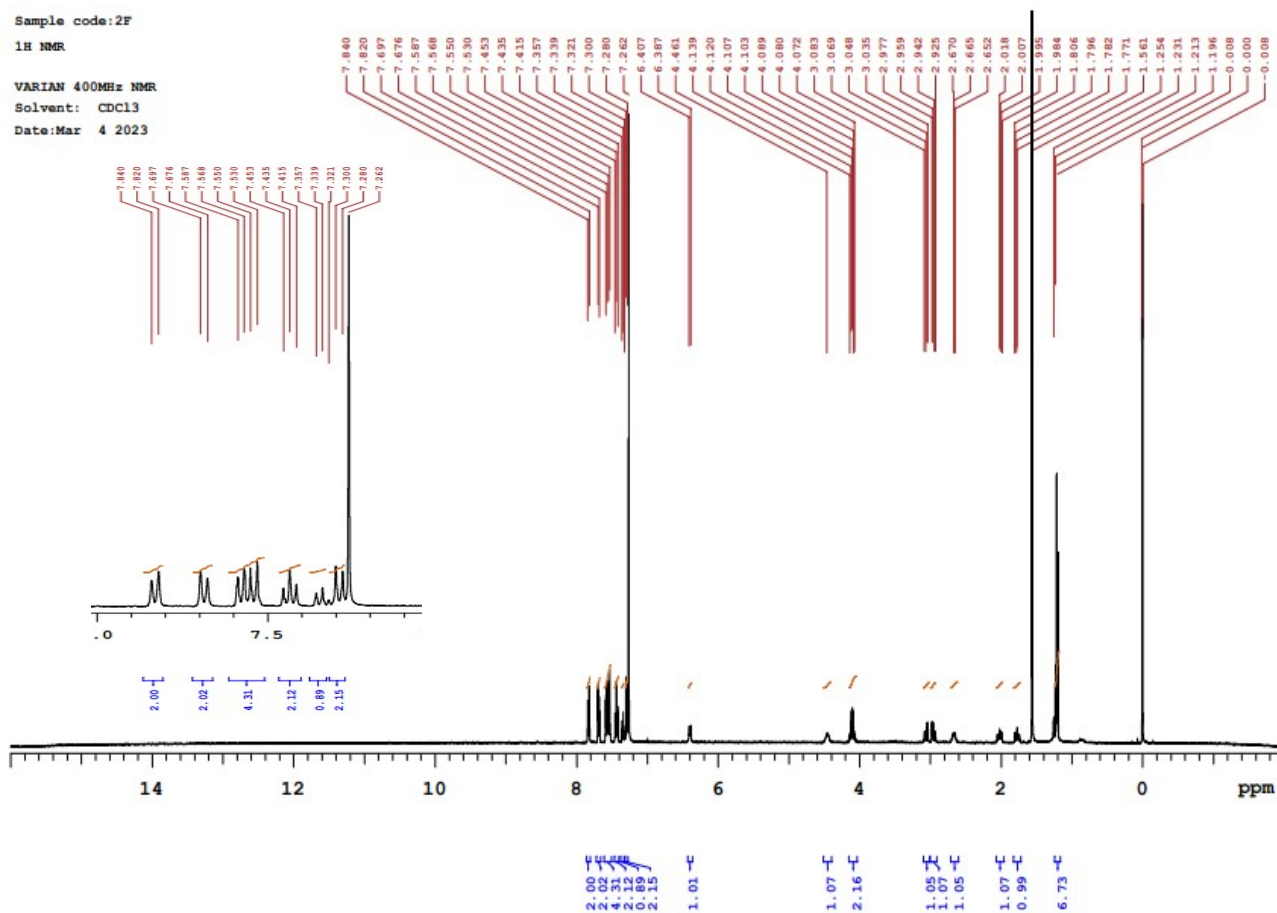

Figure S16: <sup>1</sup>H-NMR (400 MHz, CDCl<sub>3</sub>) spectrum of compound, 5f.



$^{13}\text{C}$  NMR Spectrum of compound 5f

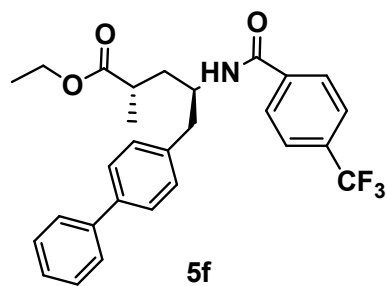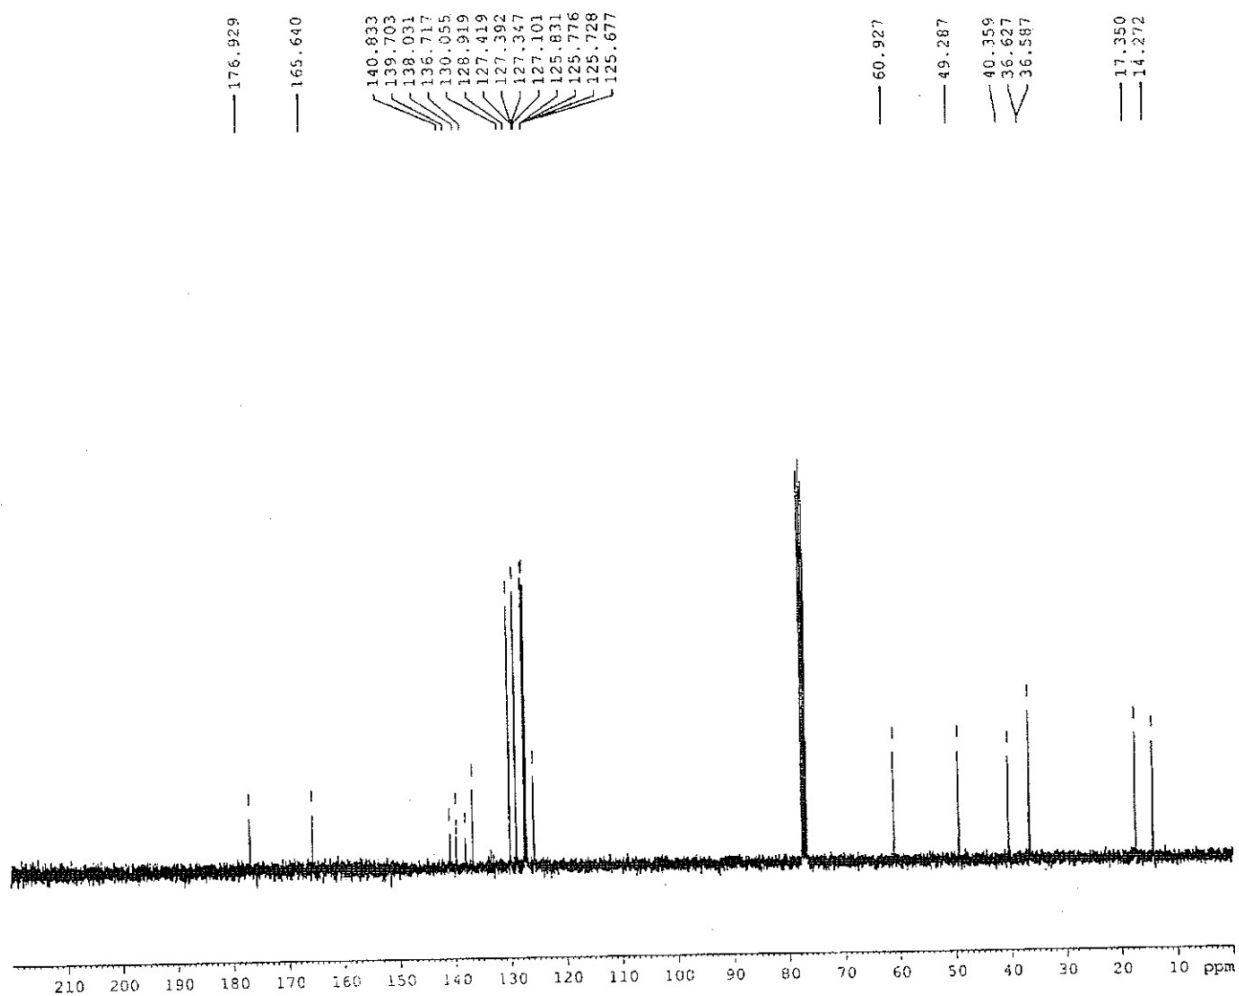

Figure S17:  $^{13}\text{C}$ -NMR (75 MHz,  $\text{CDCl}_3$ ) spectrum of compound, 5f.

Mass spectrum of compound 5f

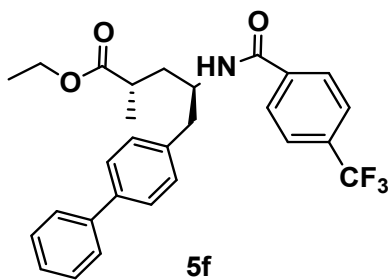

Mass: 483.2

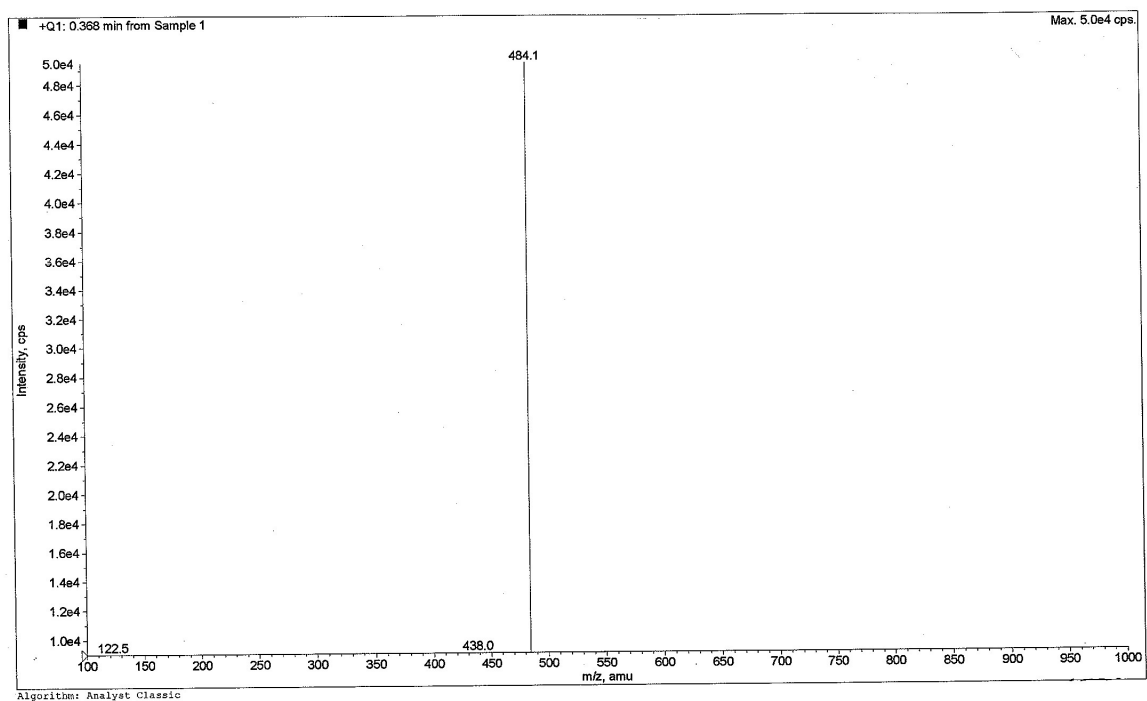

Figure S18: ESI Mass ( $M+H^+$ ) spectrum of compound, 5f.

$^1\text{H}$  NMR Spectrum of compound 5g

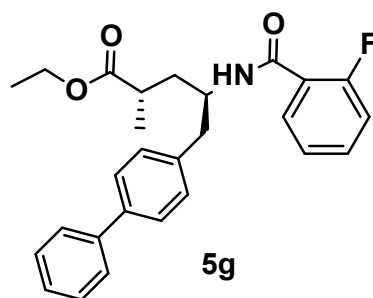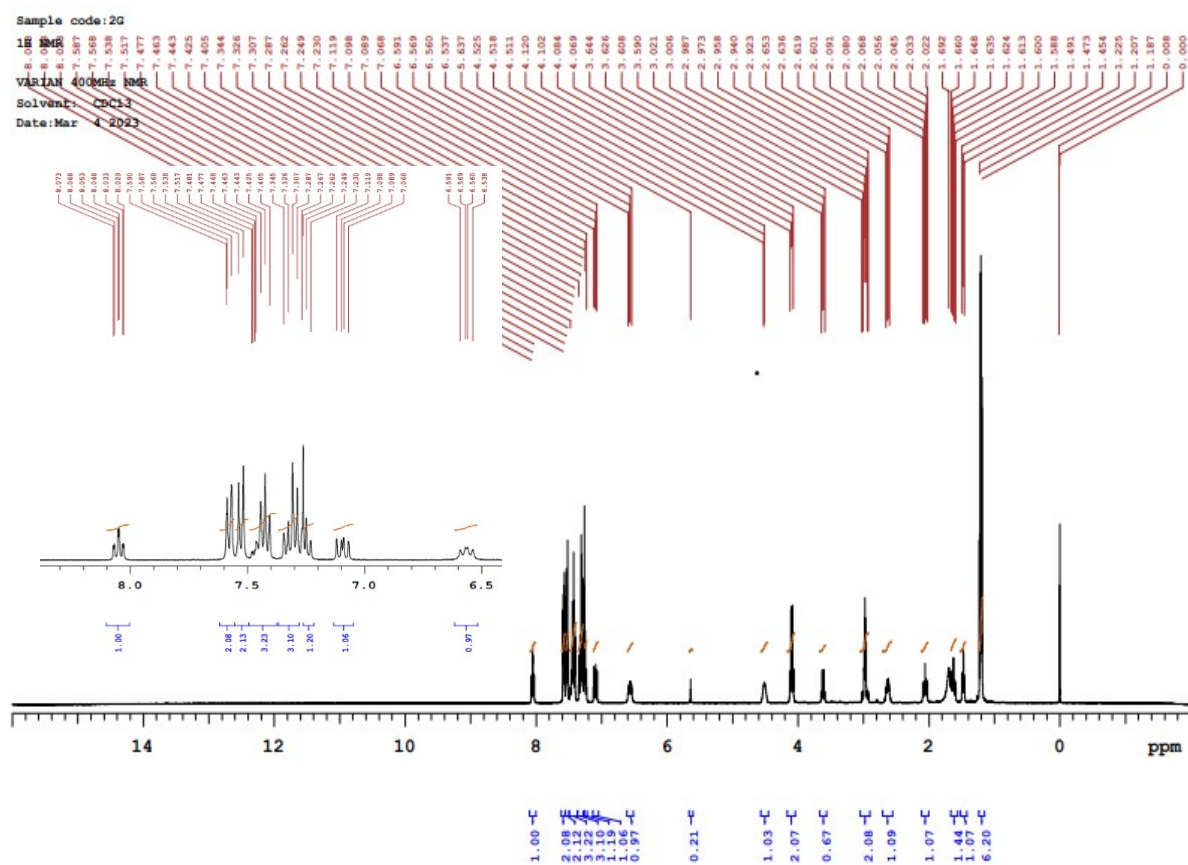

Figure S19:  $^1\text{H}$ -NMR (400 MHz,  $\text{CDCl}_3$ ) spectrum of compound, 5g.

$^{13}\text{C}$  NMR Spectrum of compound 5g

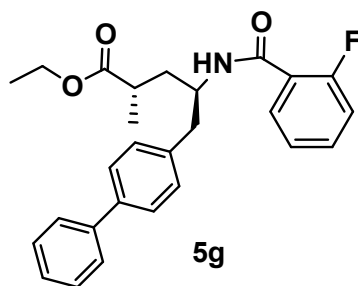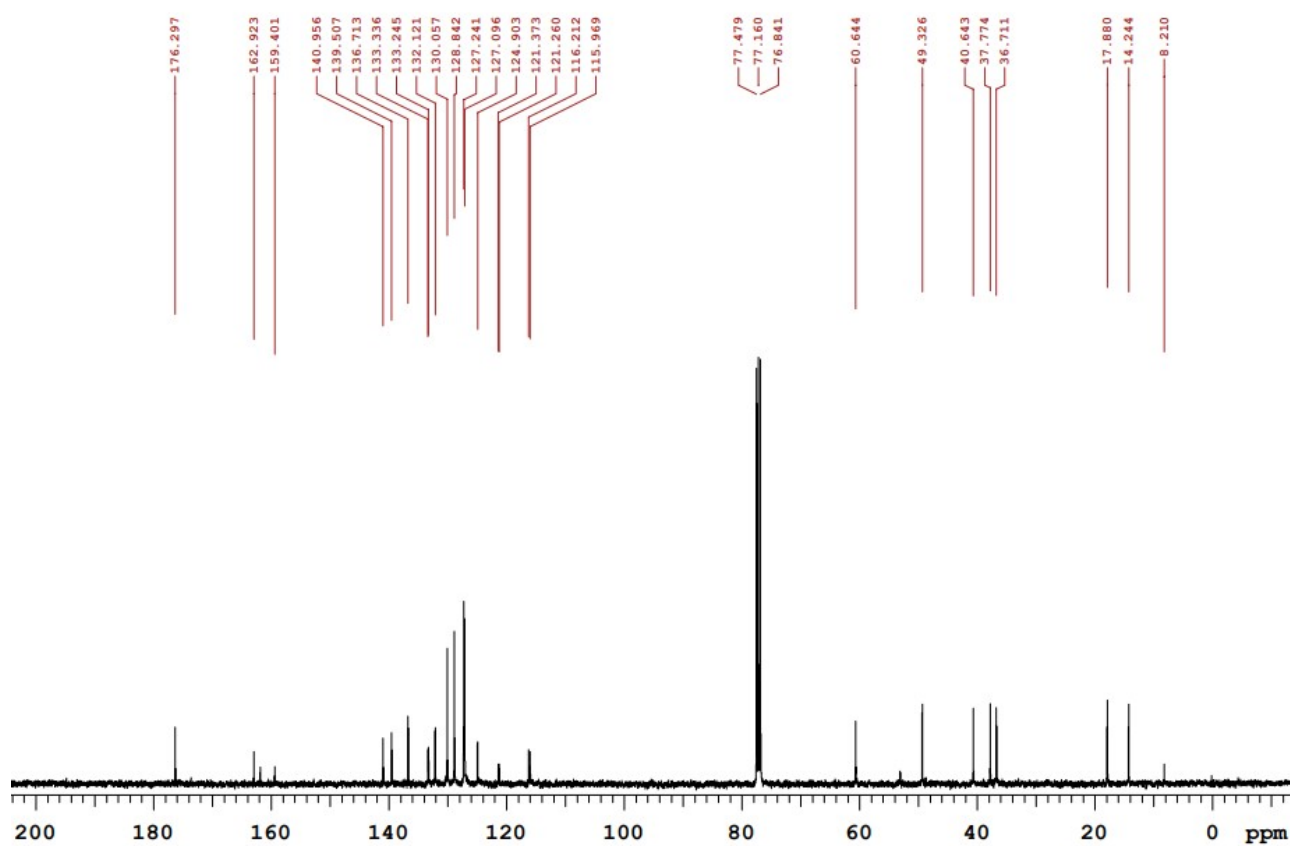

Figure S20:  $^{13}\text{C}$ -NMR (100 MHz,  $\text{CDCl}_3$ ) spectrum of compound, 5g.

Mass spectrum of compound 5g

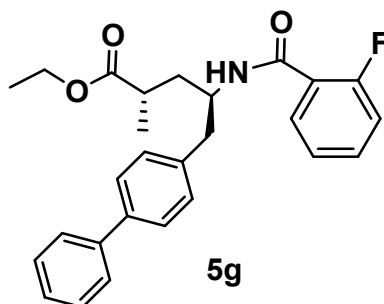

Mass: 433.2

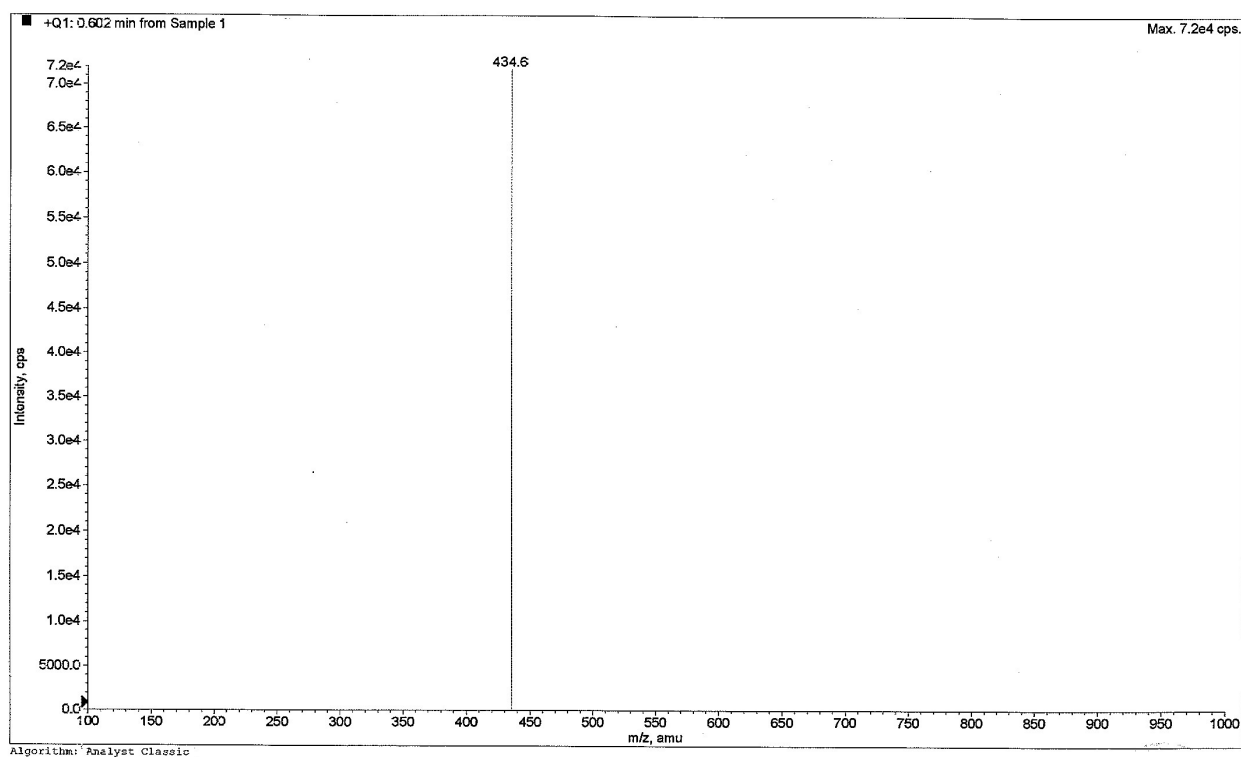

Figure S21: ESI Mass ( $M+H^+$ ) spectrum of compound, 5g.

# <sup>1</sup>H NMR Spectrum of compound 5h

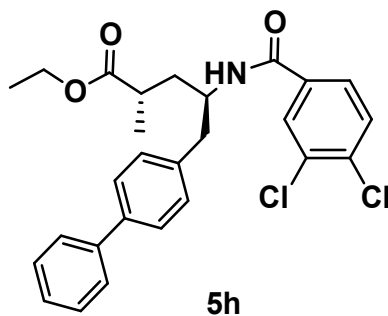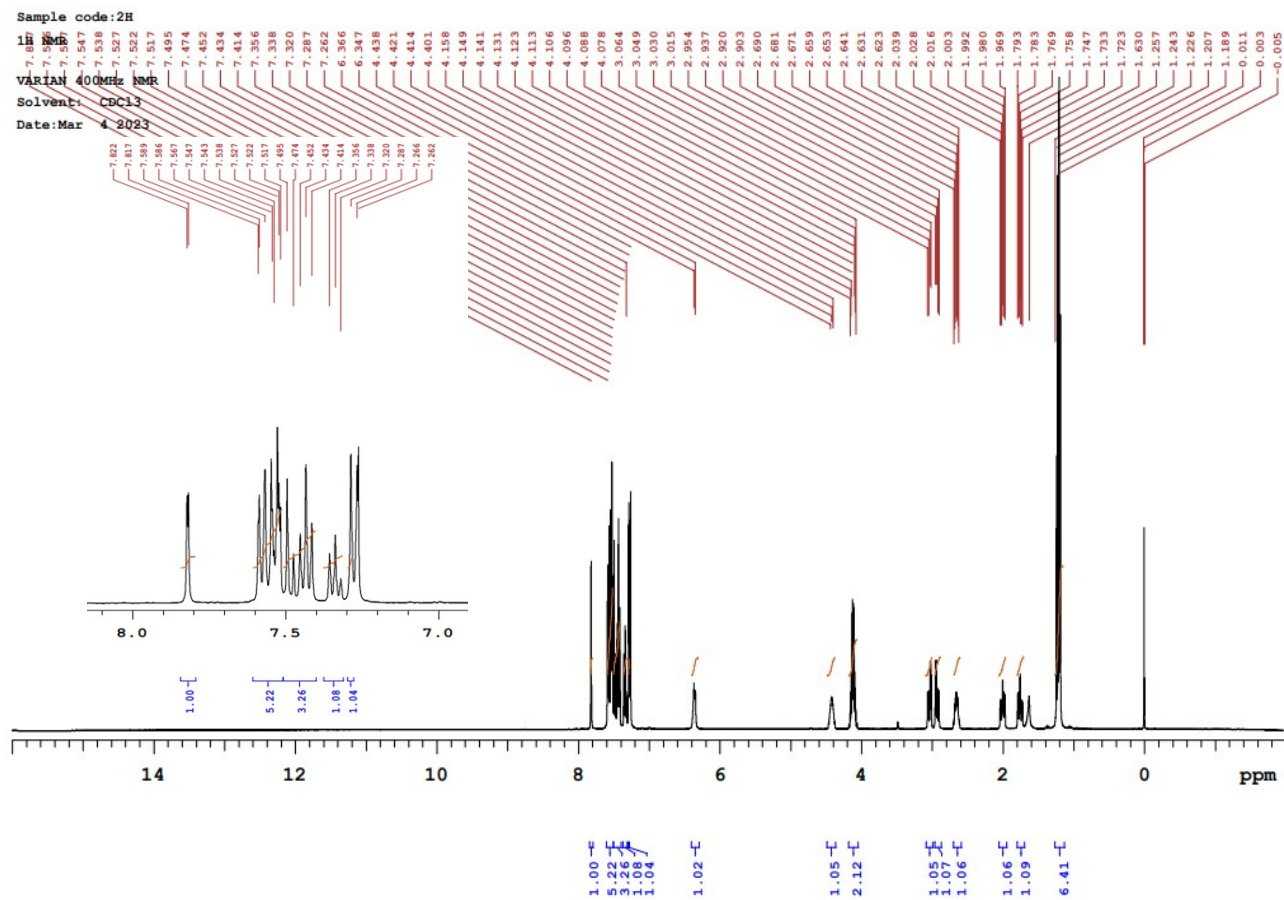

Figure S22: <sup>1</sup>H-NMR (400 MHz, CDCl<sub>3</sub>) spectrum of compound, 5h.

<sup>13</sup>C NMR Spectrum of compound 5h

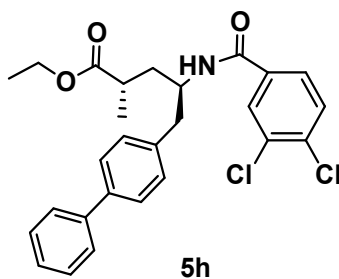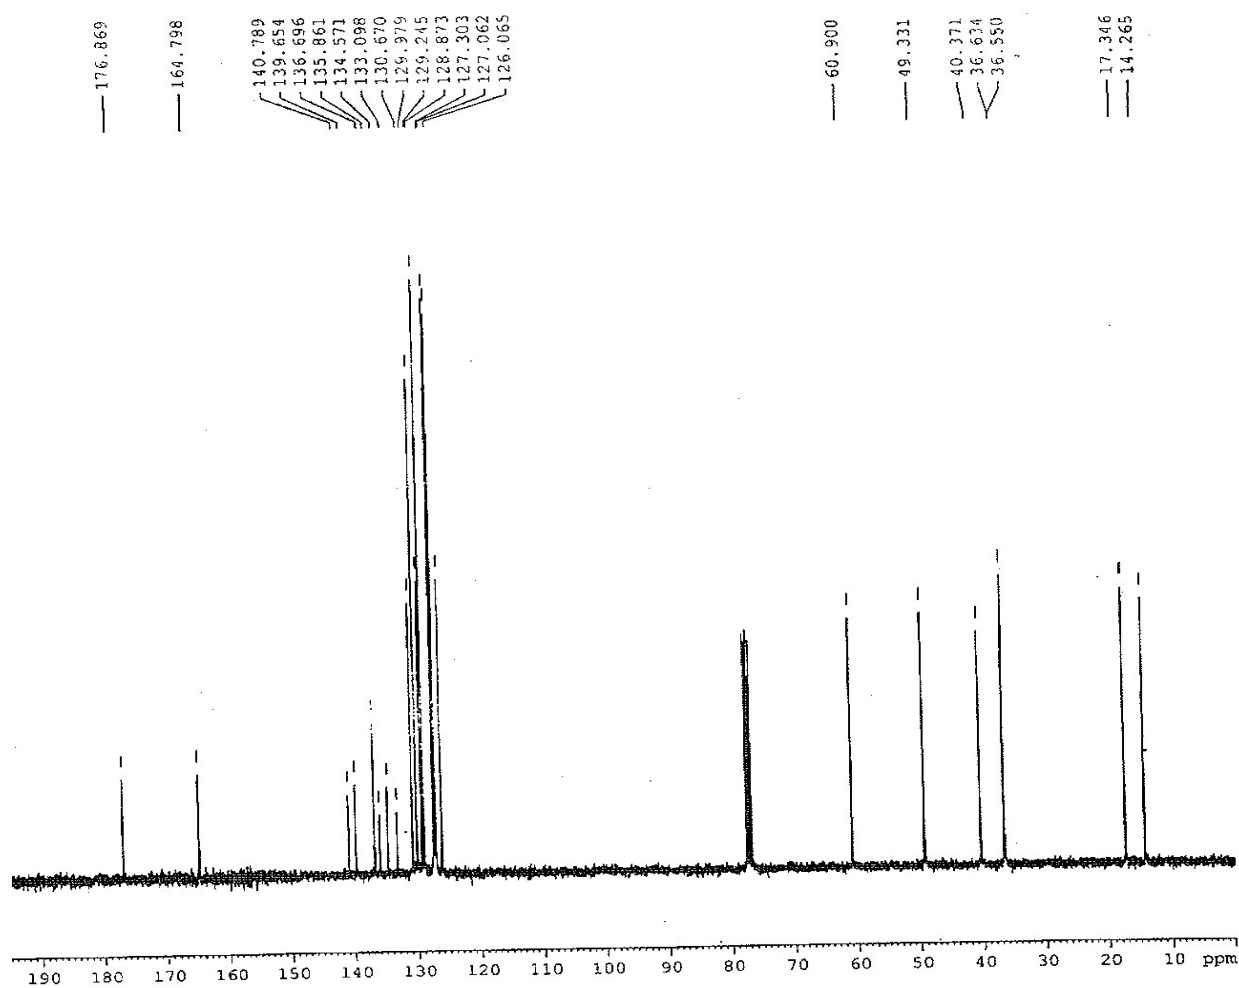

Figure S23: <sup>13</sup>C-NMR (75 MHz, CDCl<sub>3</sub>) spectrum of compound, 5h.

Mass spectrum of compound 5h

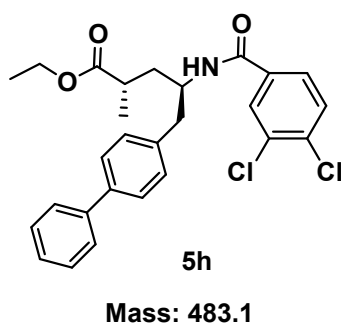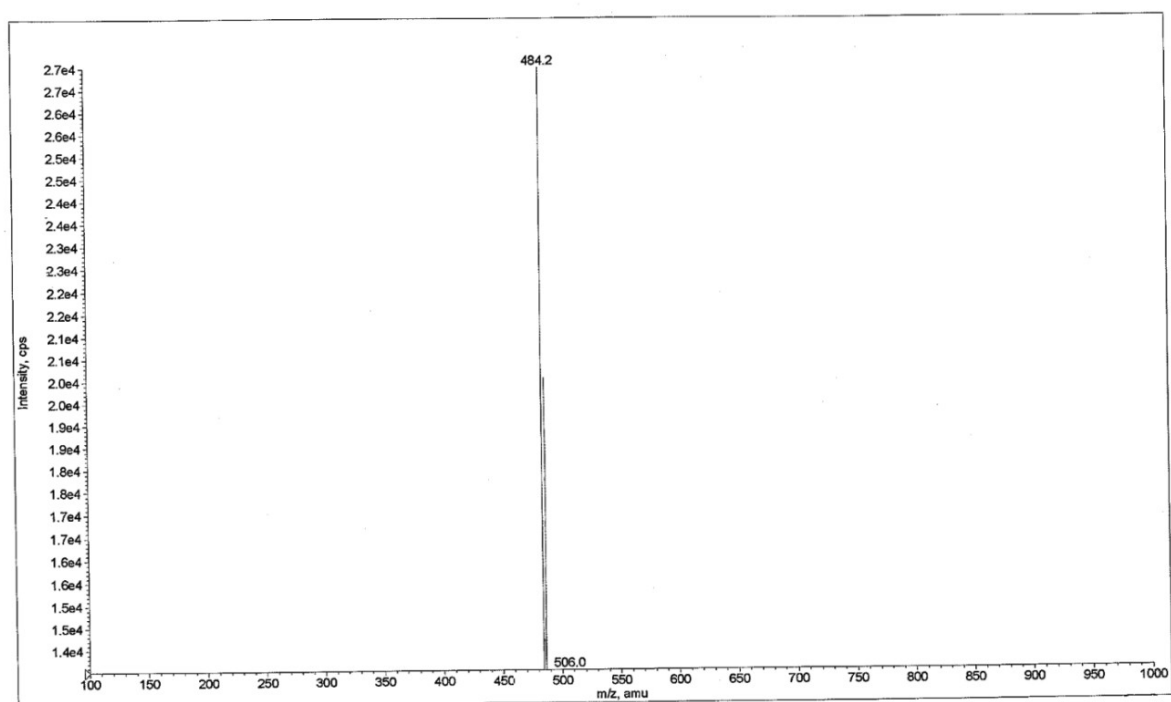

Figure S24: ESI Mass ( $M+H^+$ ) spectrum of compound, 5h.



# <sup>1</sup>H NMR Spectrum of compound 5i

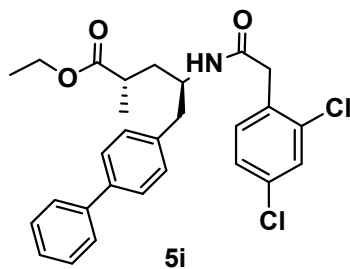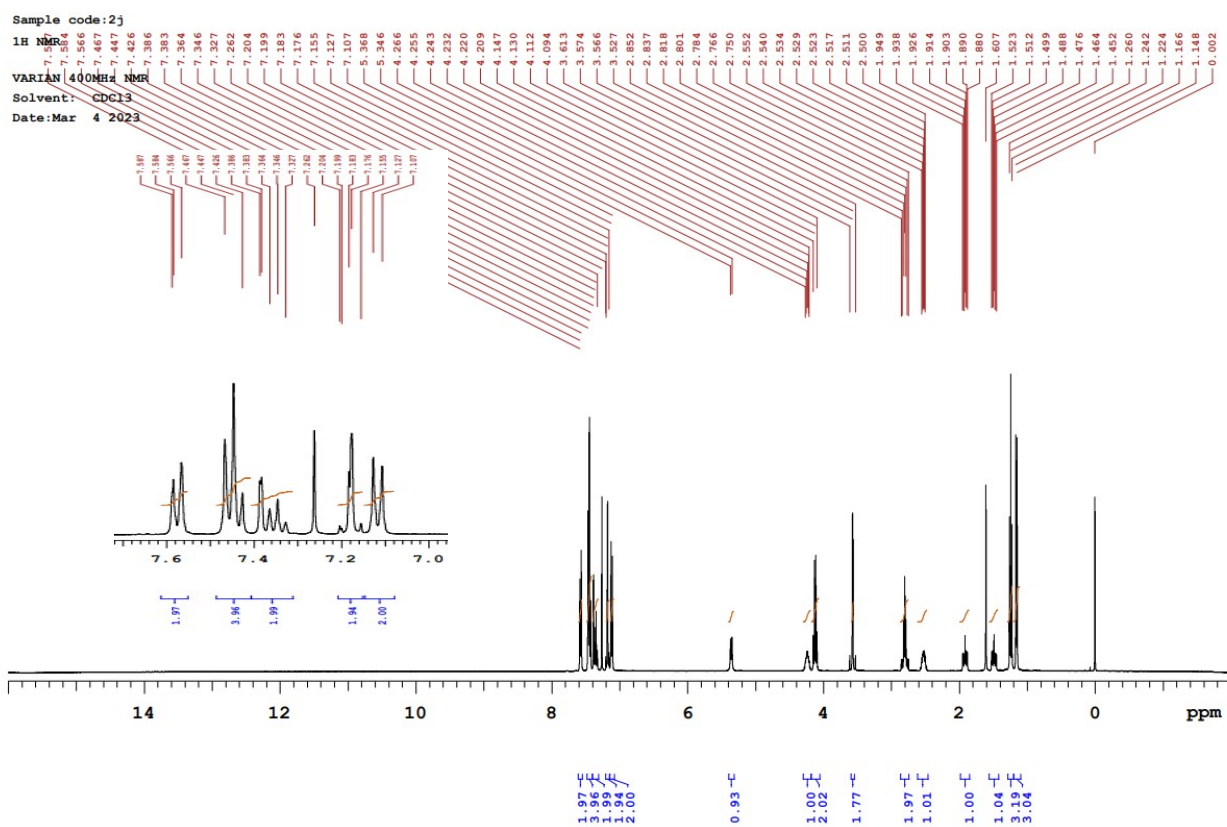

Figure S25: <sup>1</sup>H-NMR (400 MHz, CDCl<sub>3</sub>) spectrum of compound, 5i.

$^{13}\text{C}$  NMR Spectrum of compound 5i

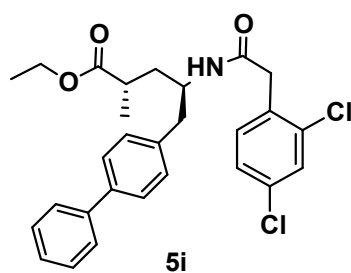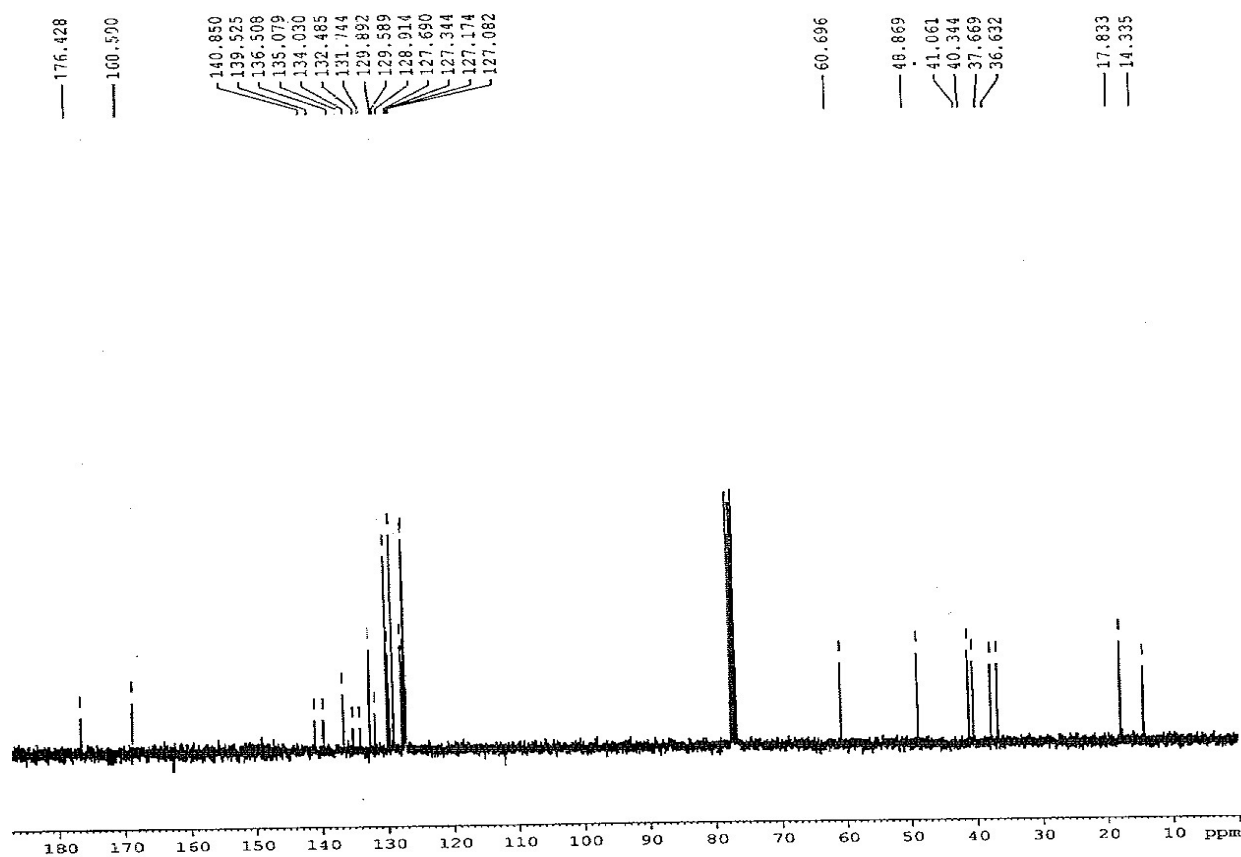

Figure S26:  $^{13}\text{C}$ -NMR (75 MHz,  $\text{CDCl}_3$ ) spectrum of compound, 5i.

Mass spectrum of compound 5i

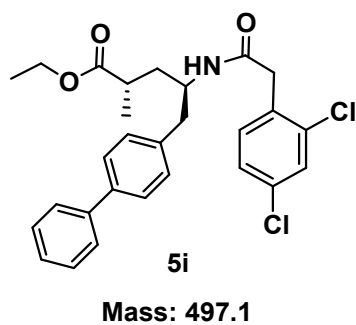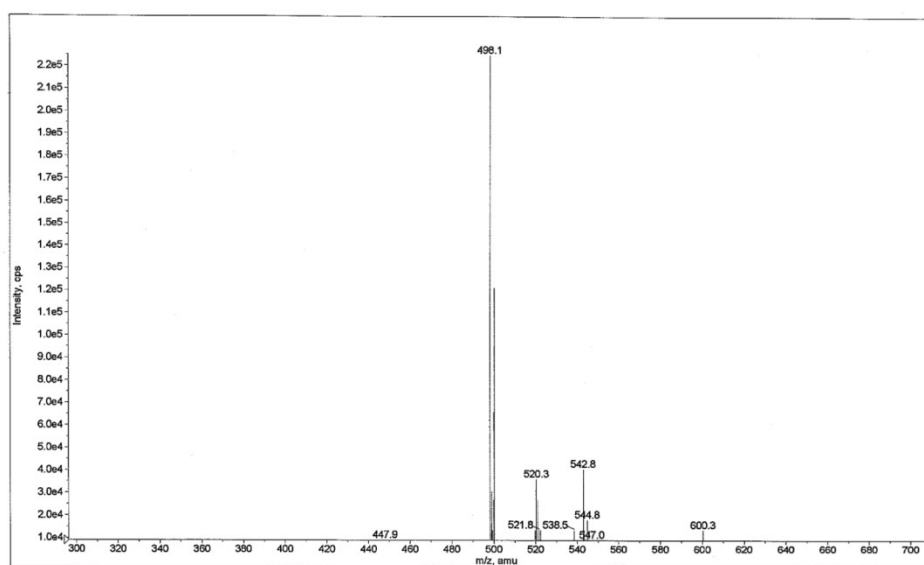

Figure S27: ESI Mass ( $M+H^+$ ) spectrum of compound, 5i.

<sup>1</sup>H NMR Spectrum of compound 5j

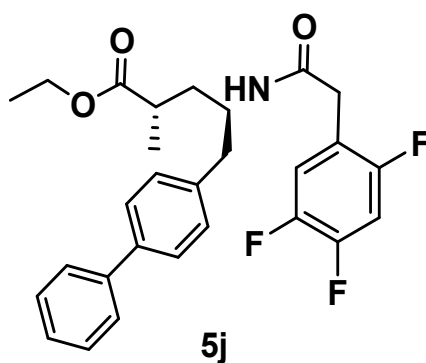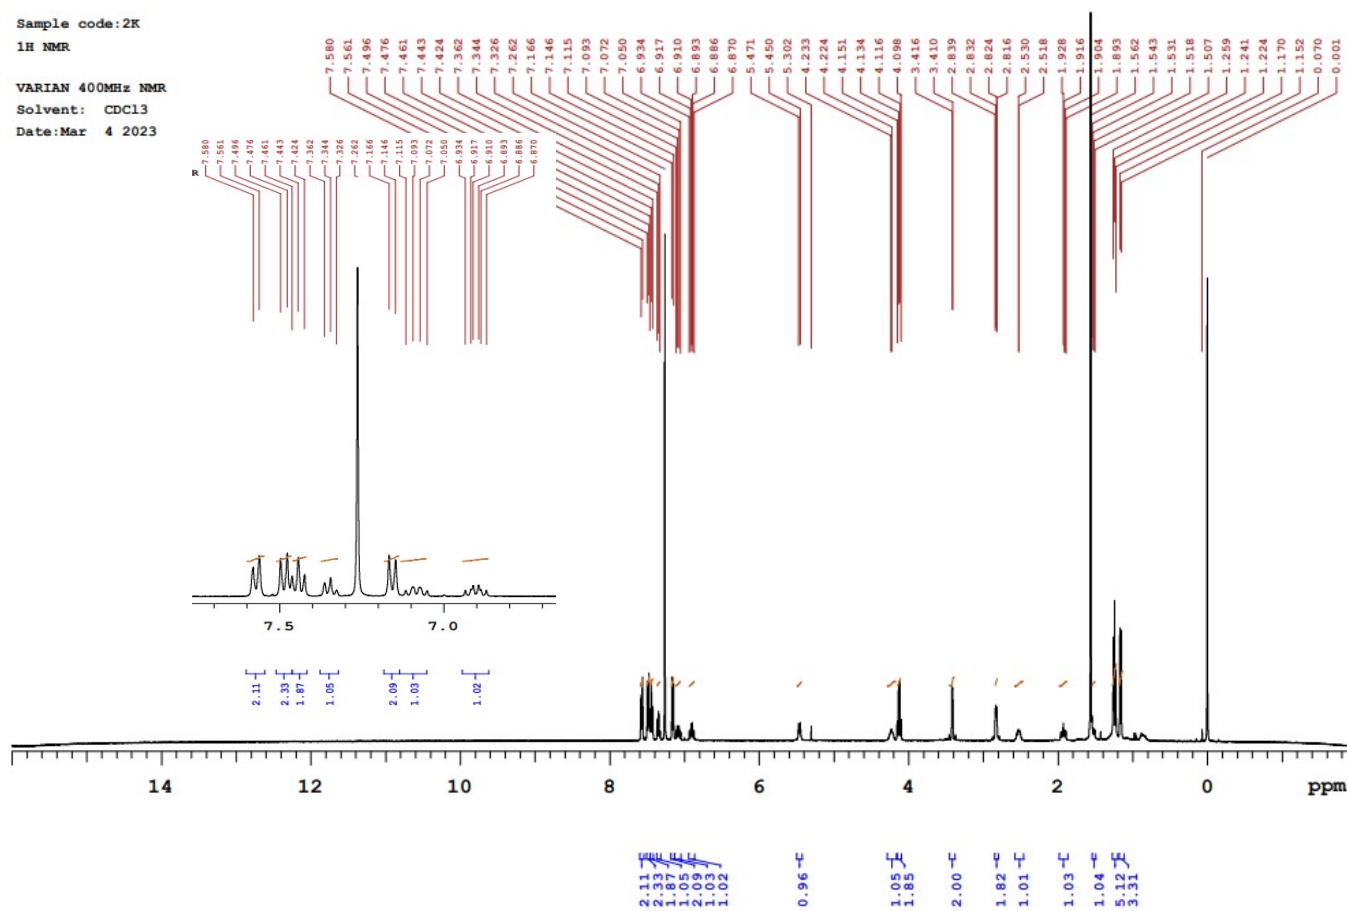

Figure S28: <sup>1</sup>H-NMR (400 MHz, CDCl<sub>3</sub>) spectrum of compound, 5j.

$^{13}\text{C}$  NMR Spectrum of compound 5j

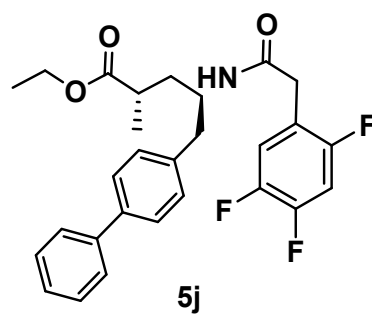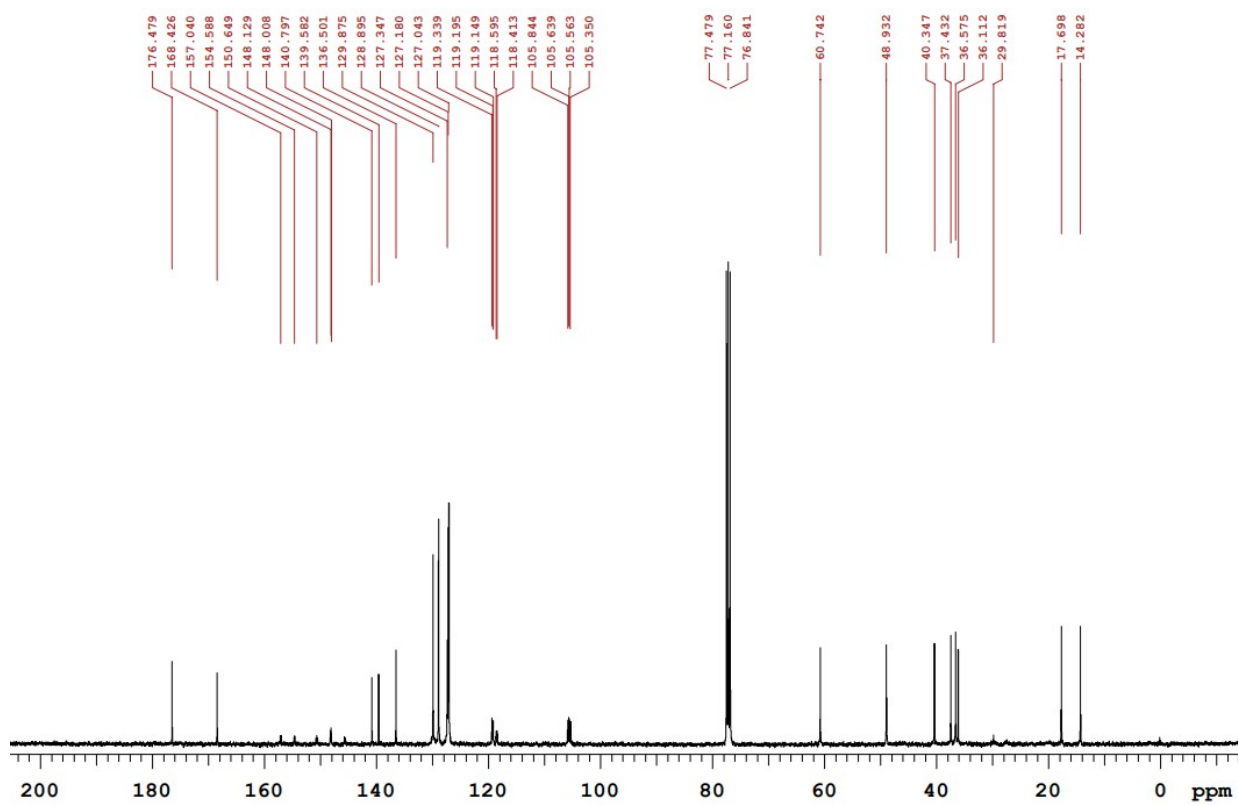

Figure S29:  $^{13}\text{C}$ -NMR (100 MHz,  $\text{CDCl}_3$ ) spectrum of compound, 5j.

<sup>19</sup>F NMR Spectrum of compound 5j

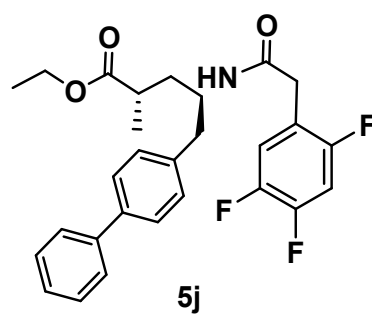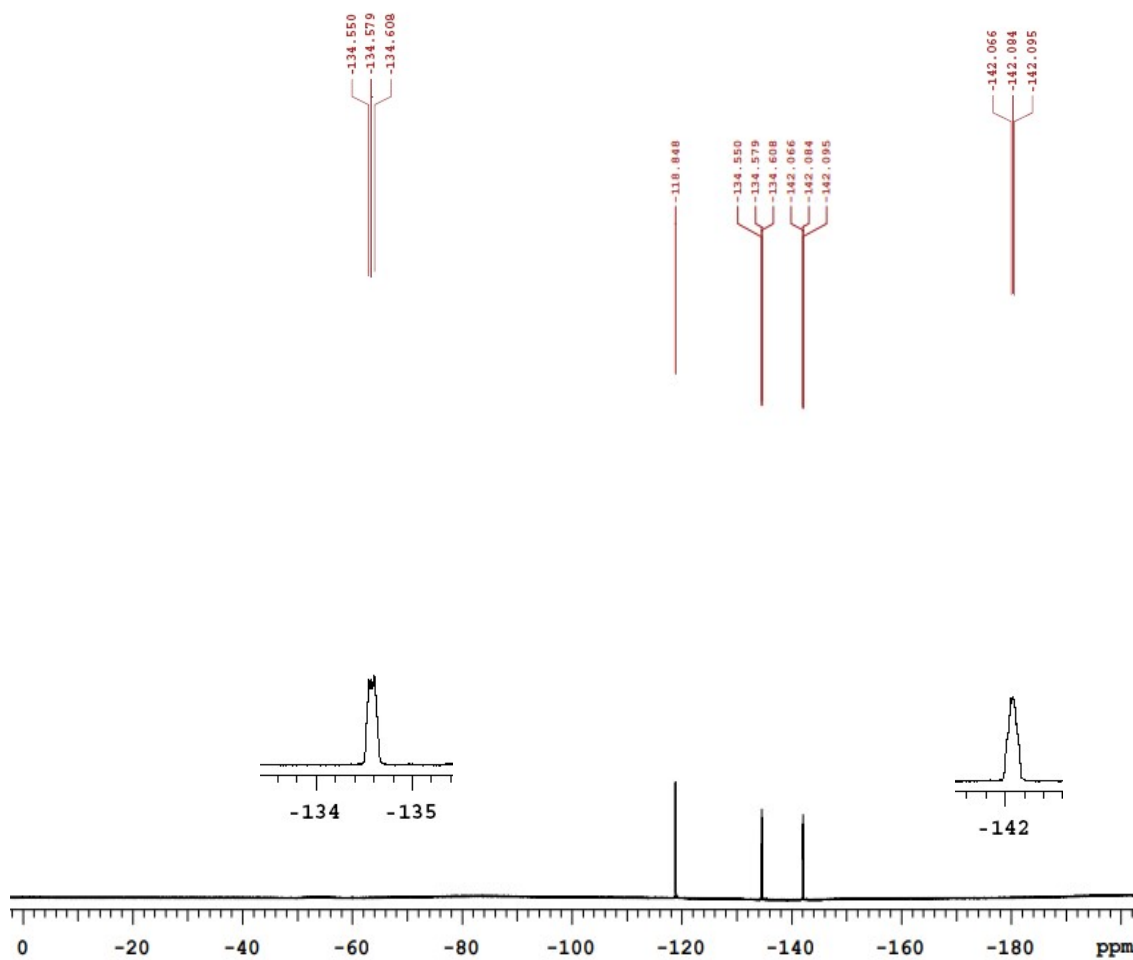

Figure S30: <sup>19</sup>F-NMR (400 MHz, CDCl<sub>3</sub>) spectrum of compound, 5j.

Mass spectrum of compound 5j

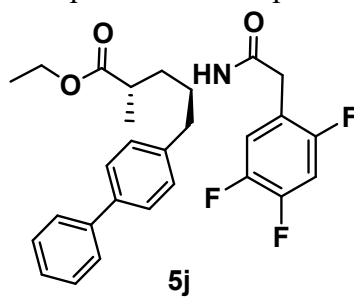

Mass: 483.2

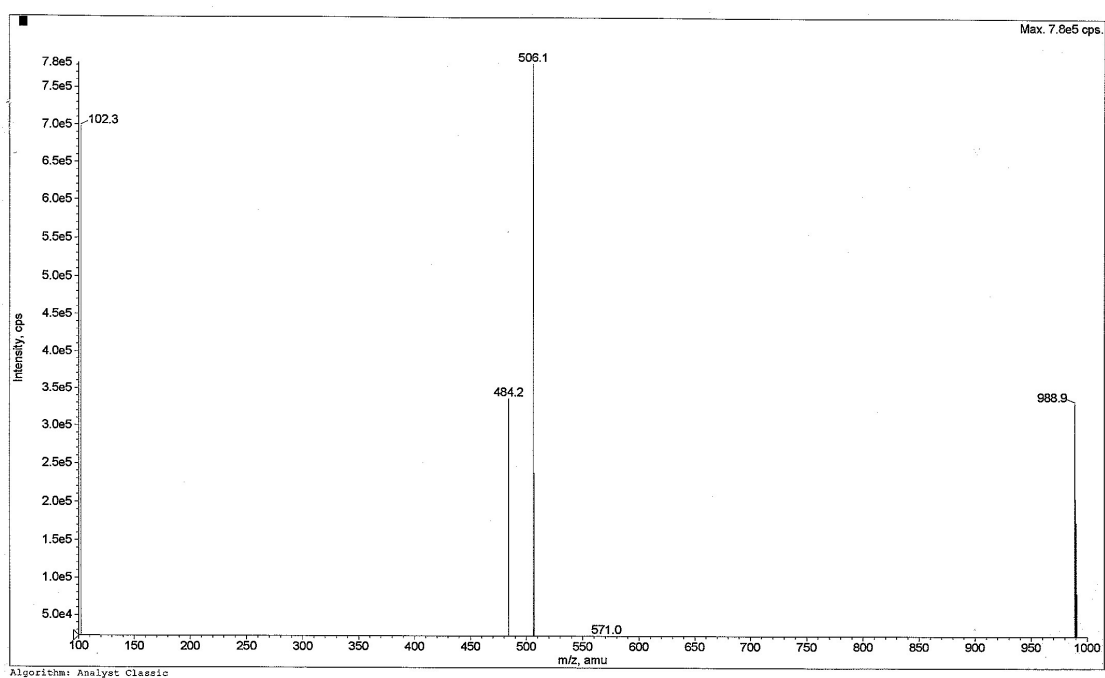

Figure S31: ESI Mass ( $M+H^+$ ) spectrum of compound, 5j.

# <sup>1</sup>H NMR Spectrum of compound 5k

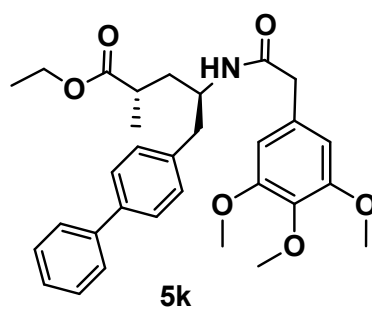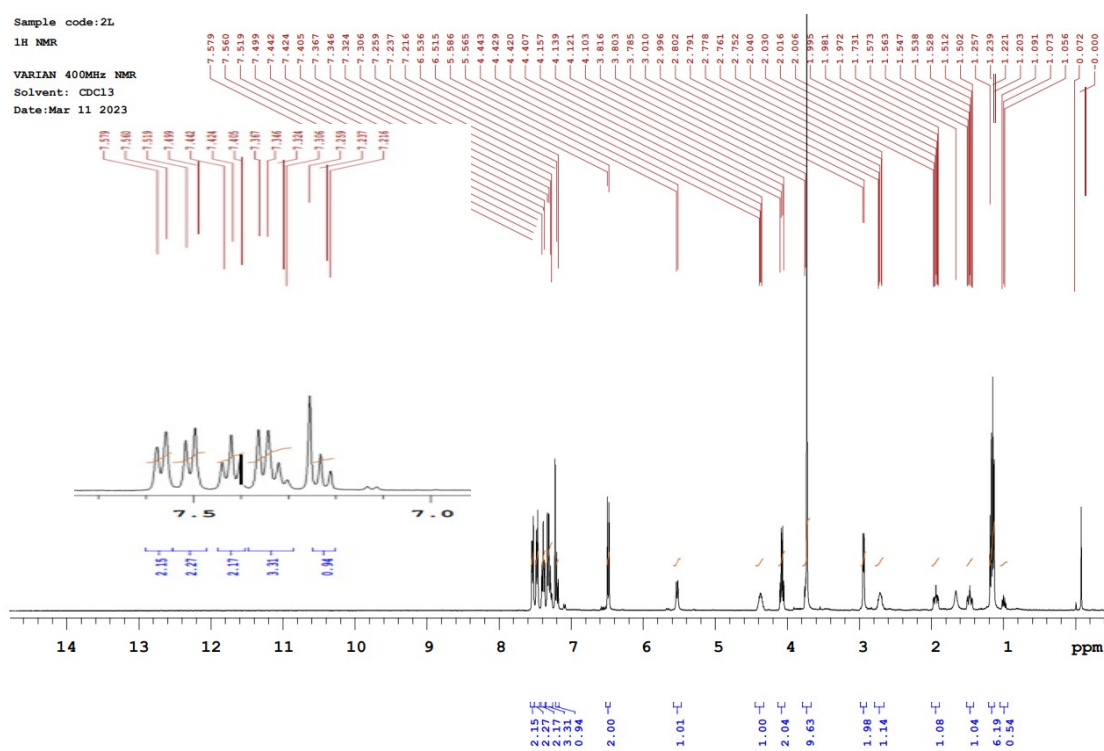

Figure S32: <sup>1</sup>H-NMR (300 MHz, CDCl<sub>3</sub>) spectrum of compound, 5k.



<sup>13</sup>C NMR Spectrum of compound 5k

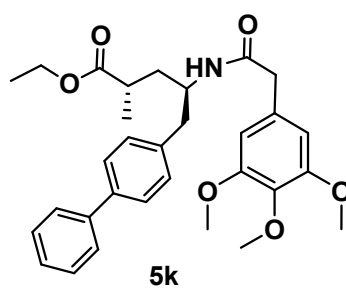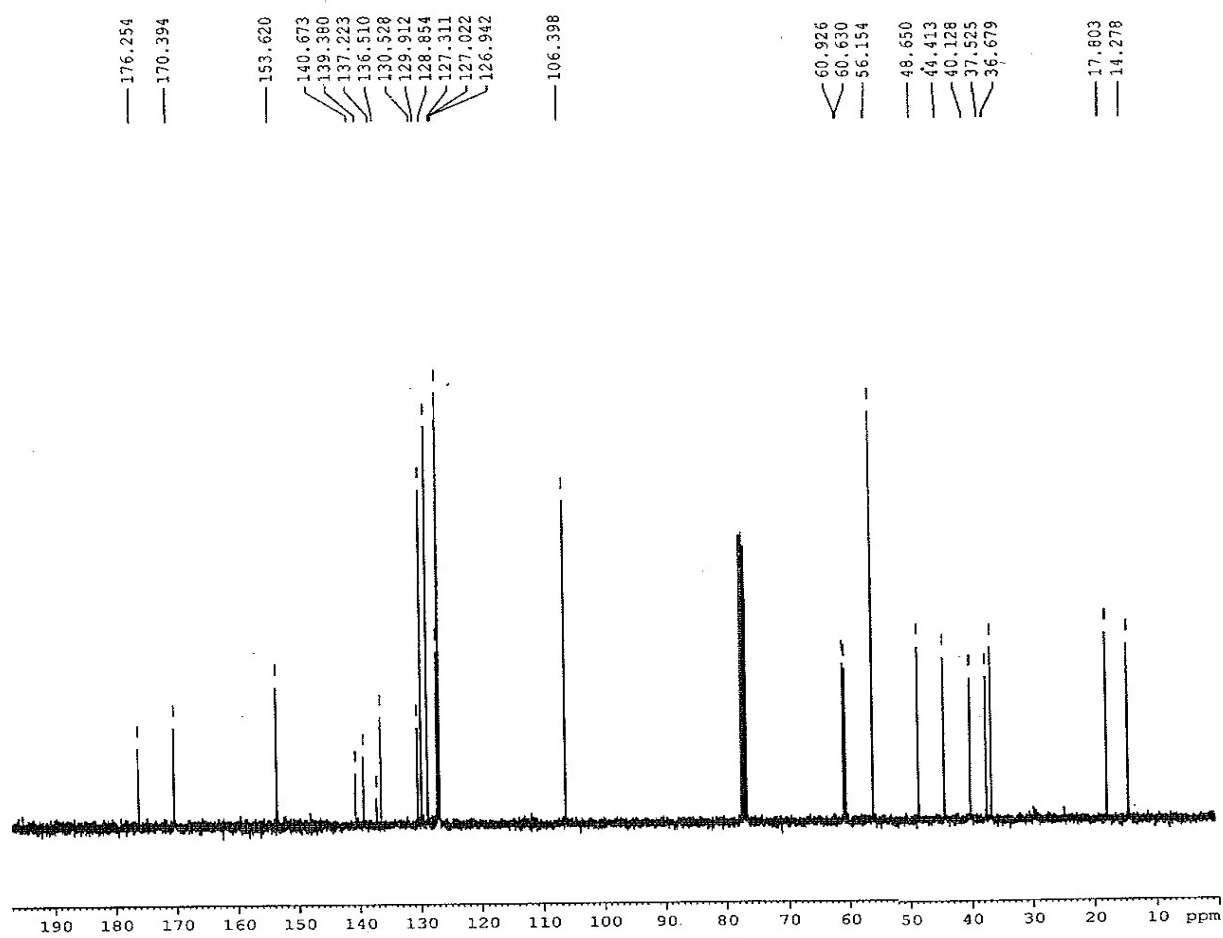

Figure S33: <sup>13</sup>C-NMR (75 MHz, CDCl<sub>3</sub>) spectrum of compound, 5k.

Mass spectrum of compound 5k

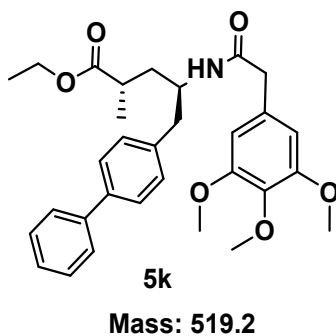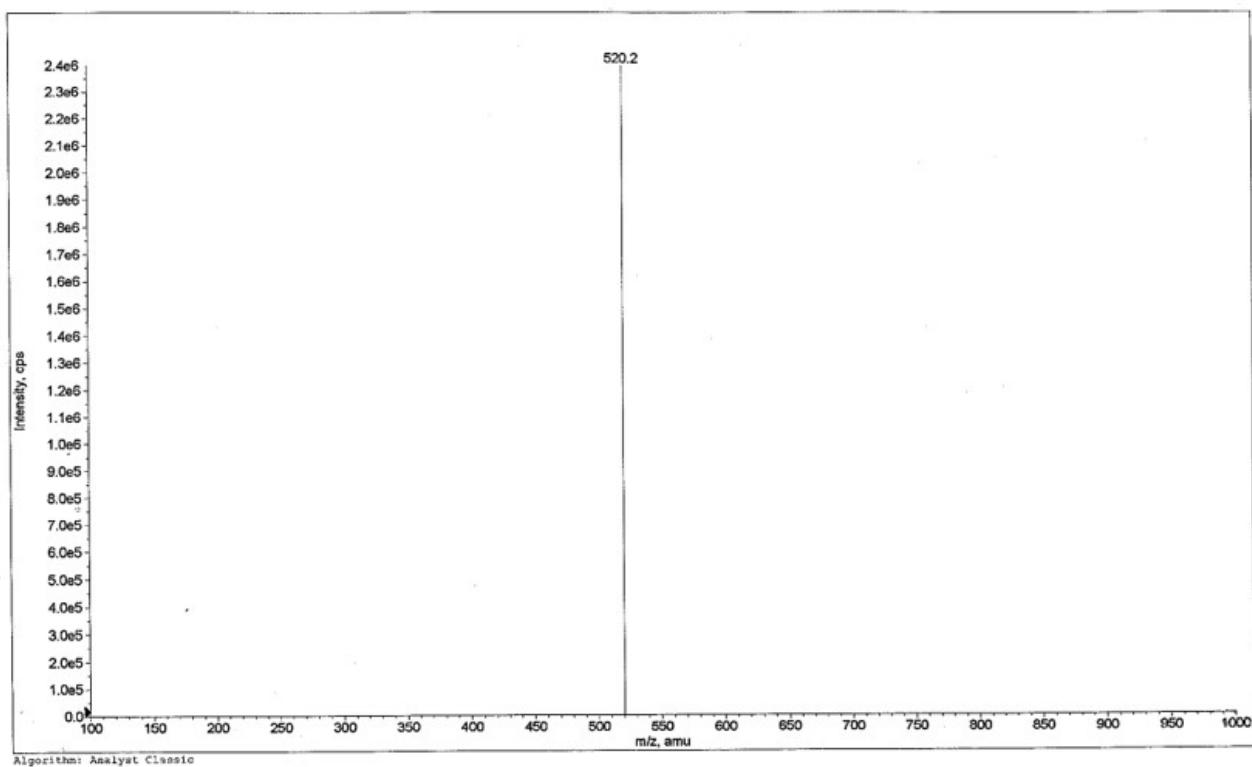

Figure S34: ESI Mass ( $M+H^+$ ) spectrum of compound, 5k.

<sup>1</sup>H NMR Spectrum of compound 51

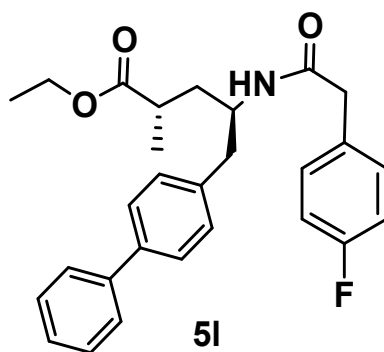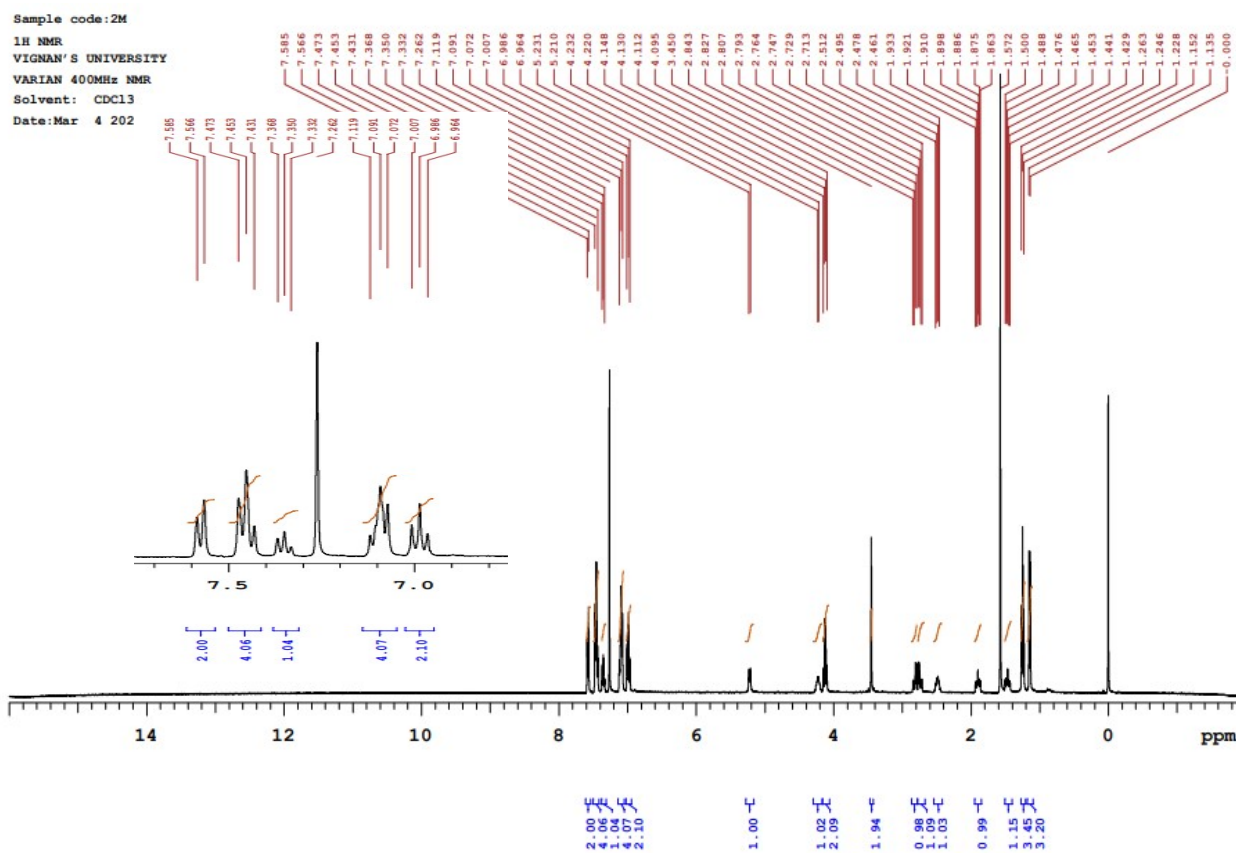

Figure S35: <sup>1</sup>H-NMR (400 MHz, CDCl<sub>3</sub>) spectrum of compound, 51.

$^{13}\text{C}$  NMR Spectrum of compound 51

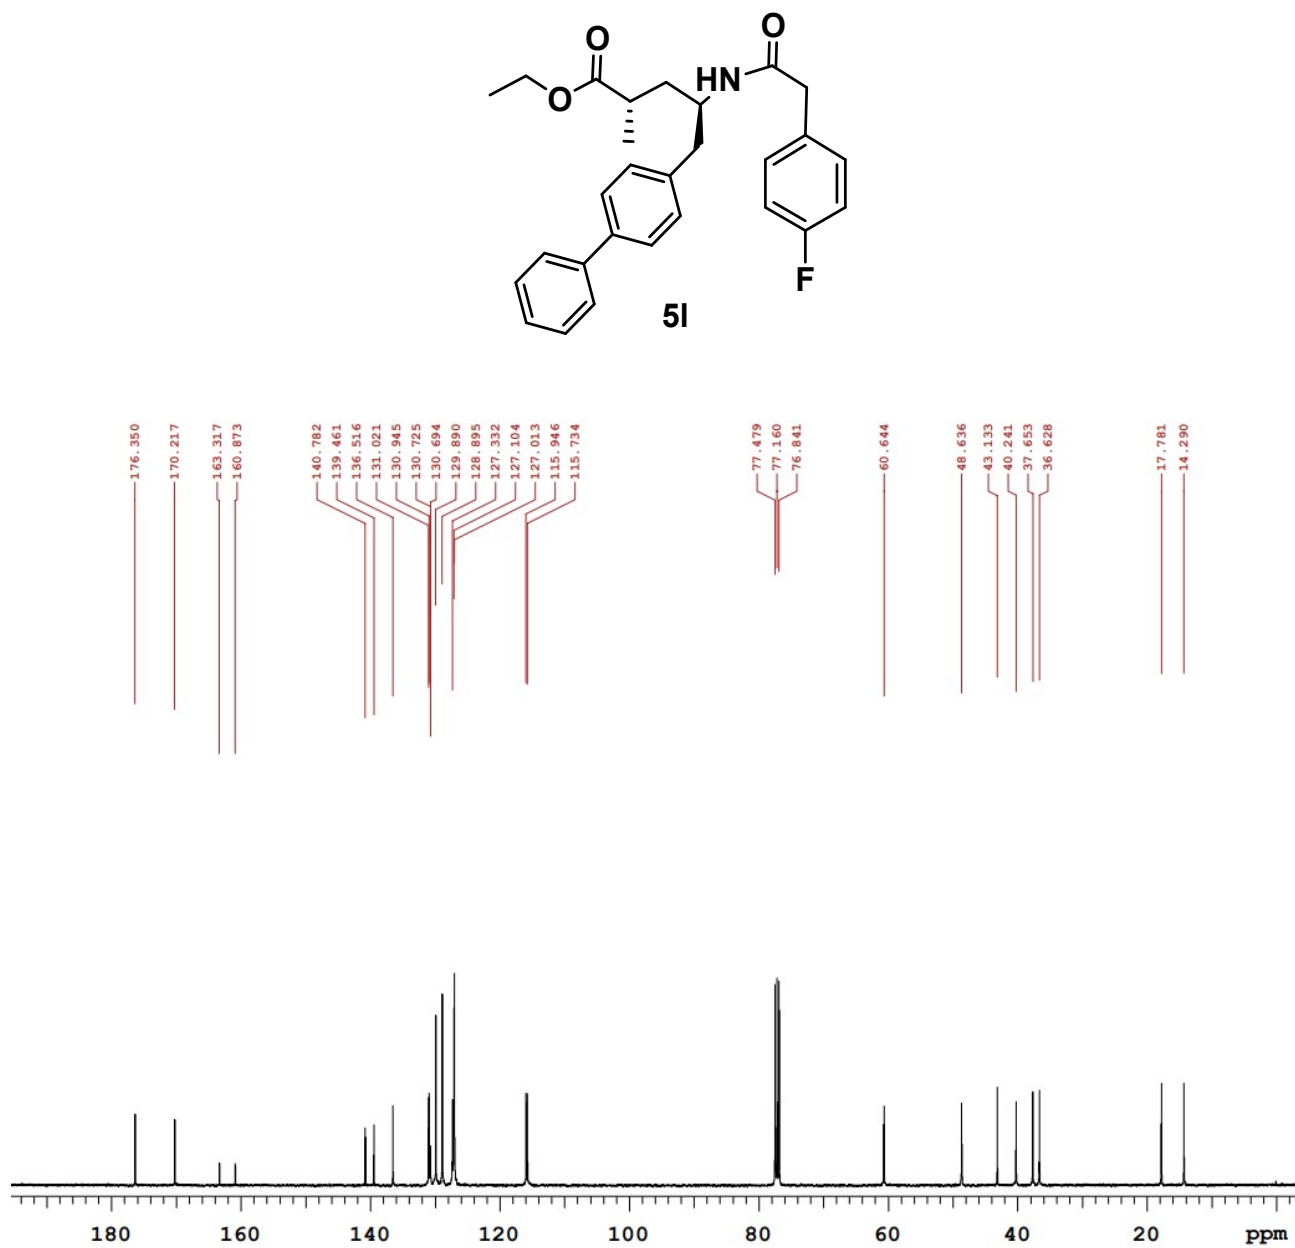

Figure S36:  $^{13}\text{C}$ -NMR (100 MHz,  $\text{CDCl}_3$ ) spectrum of compound, 51.

Mass spectrum of compound 51

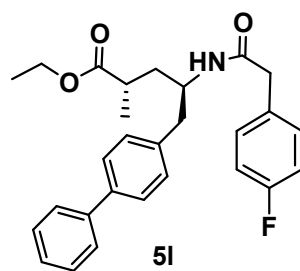

Mass: 447.2

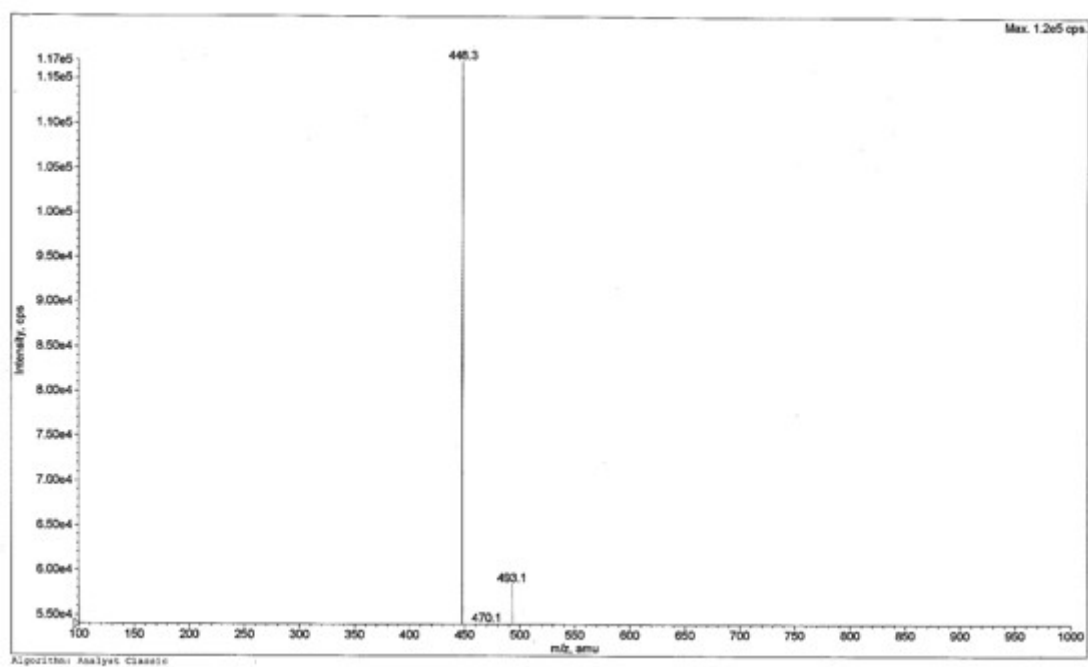

Figure S37: ESI Mass ( $M+H^+$ ) spectrum of compound, 51.

# <sup>1</sup>H NMR Spectrum of compound 5m

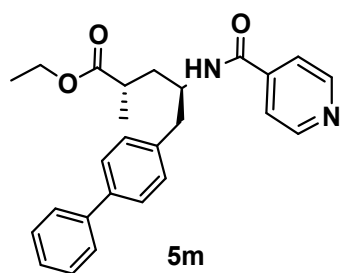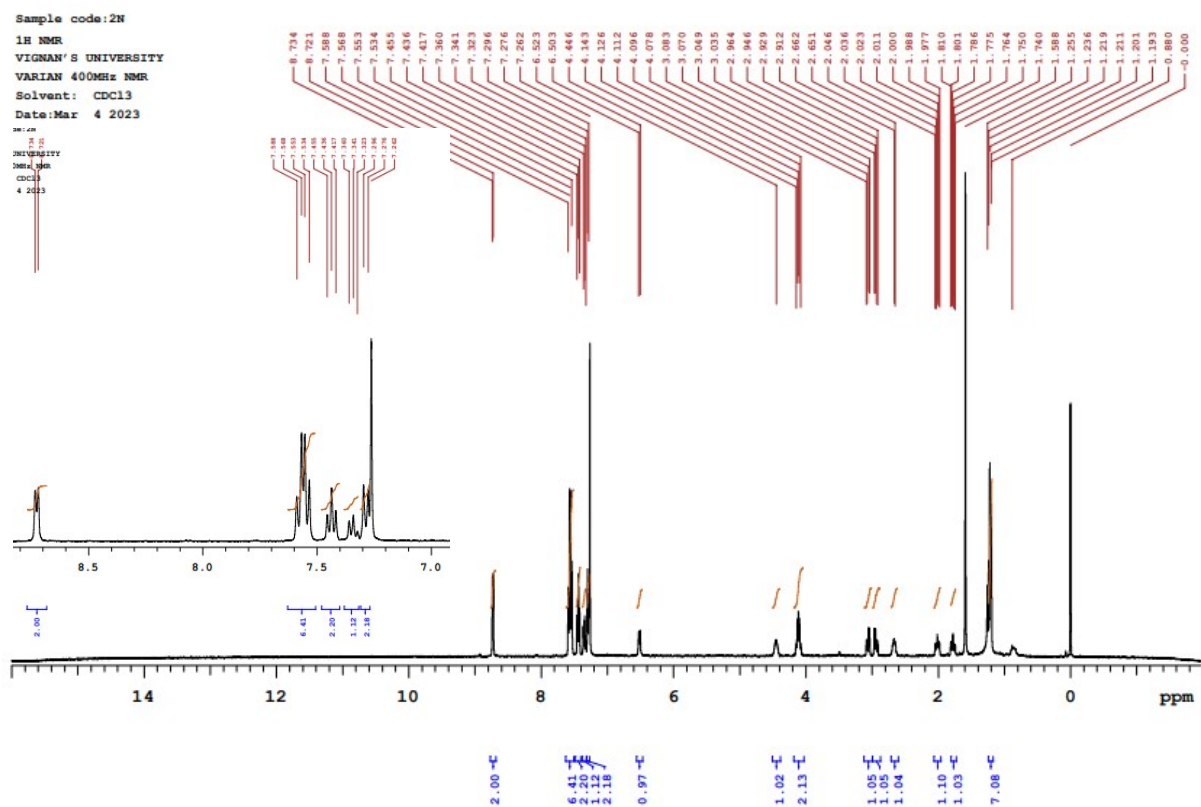

Figure S38: <sup>1</sup>H-NMR (400 MHz, CDCl<sub>3</sub>) spectrum of compound, 5m.

# <sup>13</sup>C NMR Spectrum of compound 5m

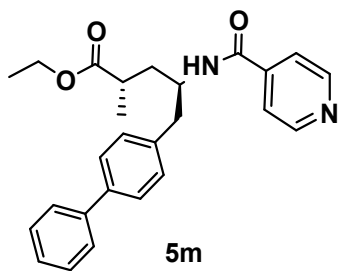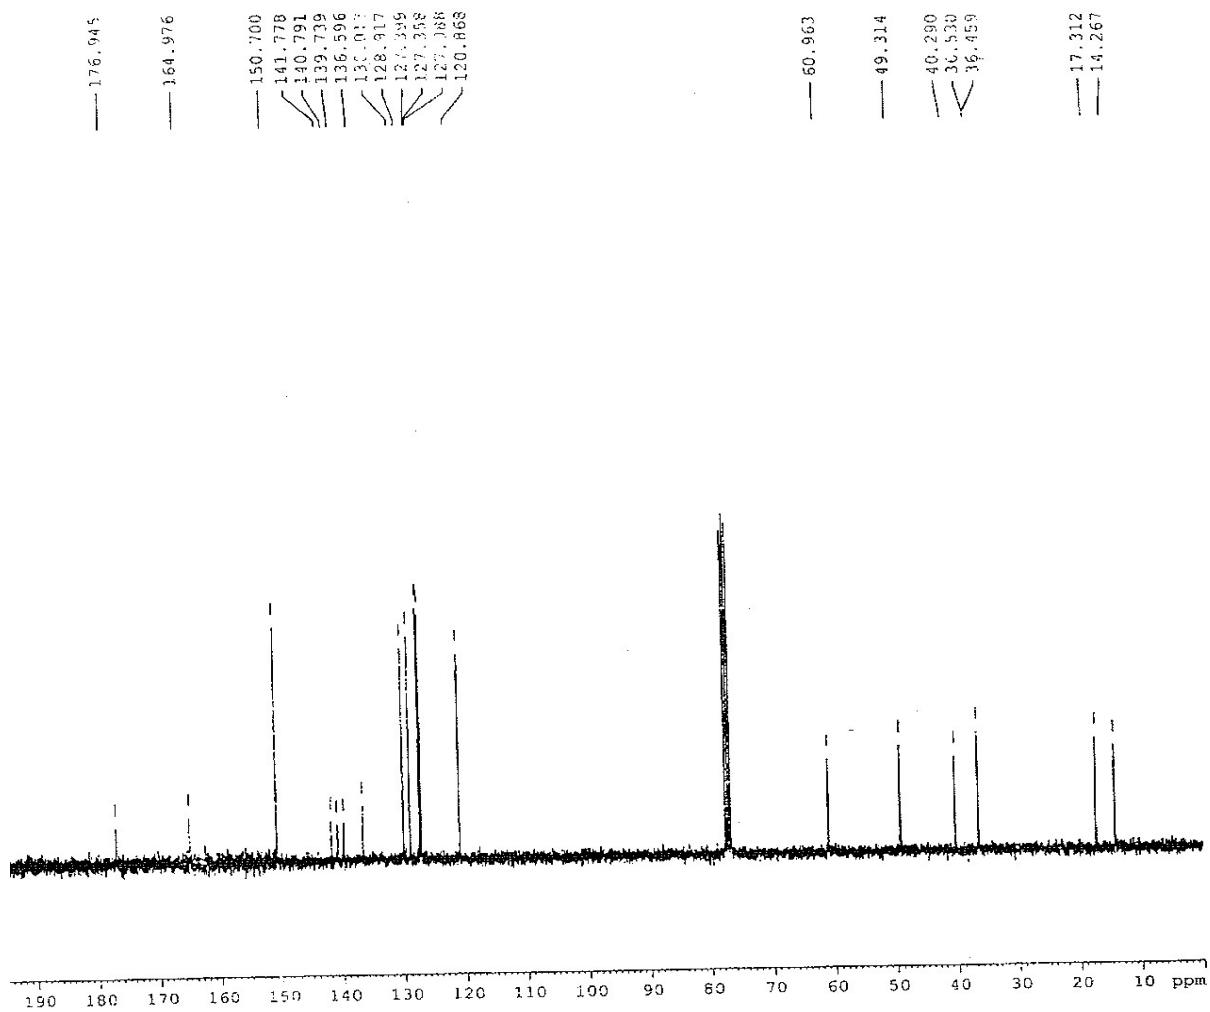

Figure S39:  $^{13}\text{C}$ -NMR (75 MHz,  $\text{CDCl}_3$ ) spectrum of compound, 5m.

Mass spectrum of compound 5m

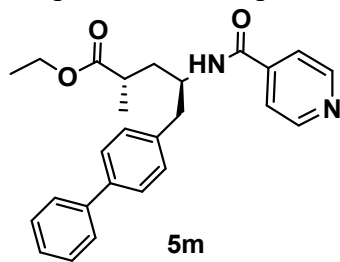

Mass: 416.2

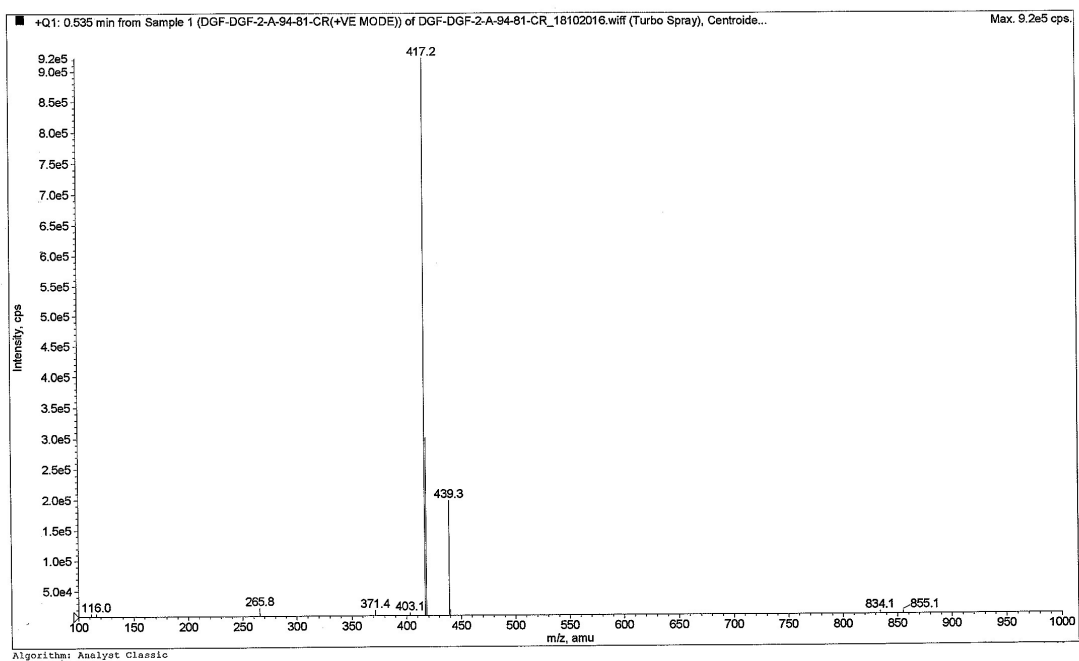

Figure S40: ESI Mass ( $M+H^+$ ) spectrum of compound, 5m.



<sup>1</sup>H NMR Spectrum of compound 5n

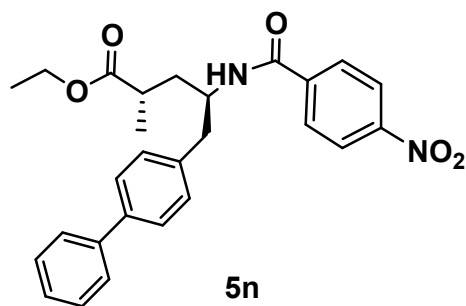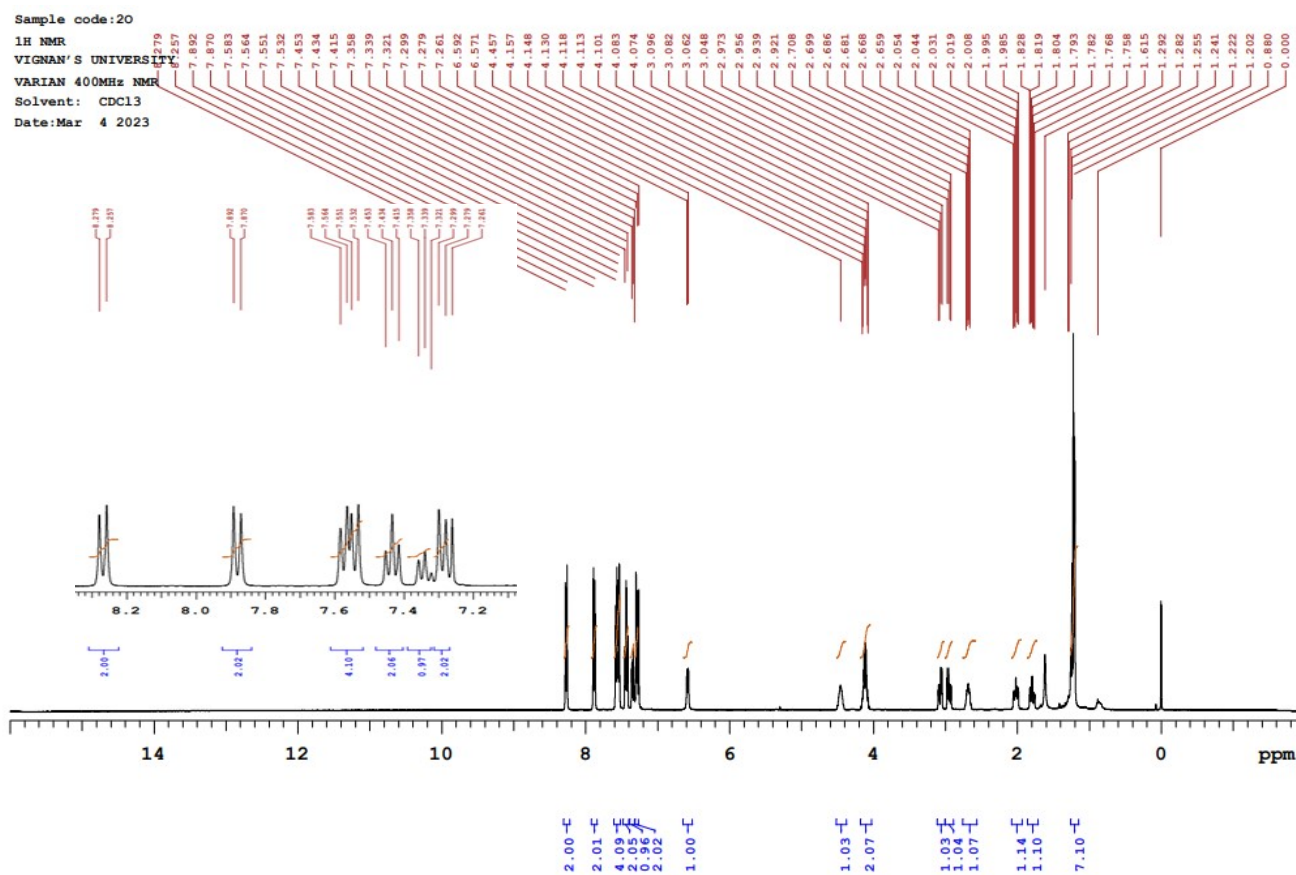

Figure S41: <sup>1</sup>H-NMR (400 MHz, CDCl<sub>3</sub>) spectrum of compound, 5n.

<sup>13</sup>C NMR Spectrum of compound 5n

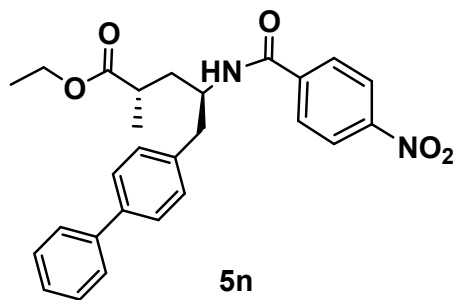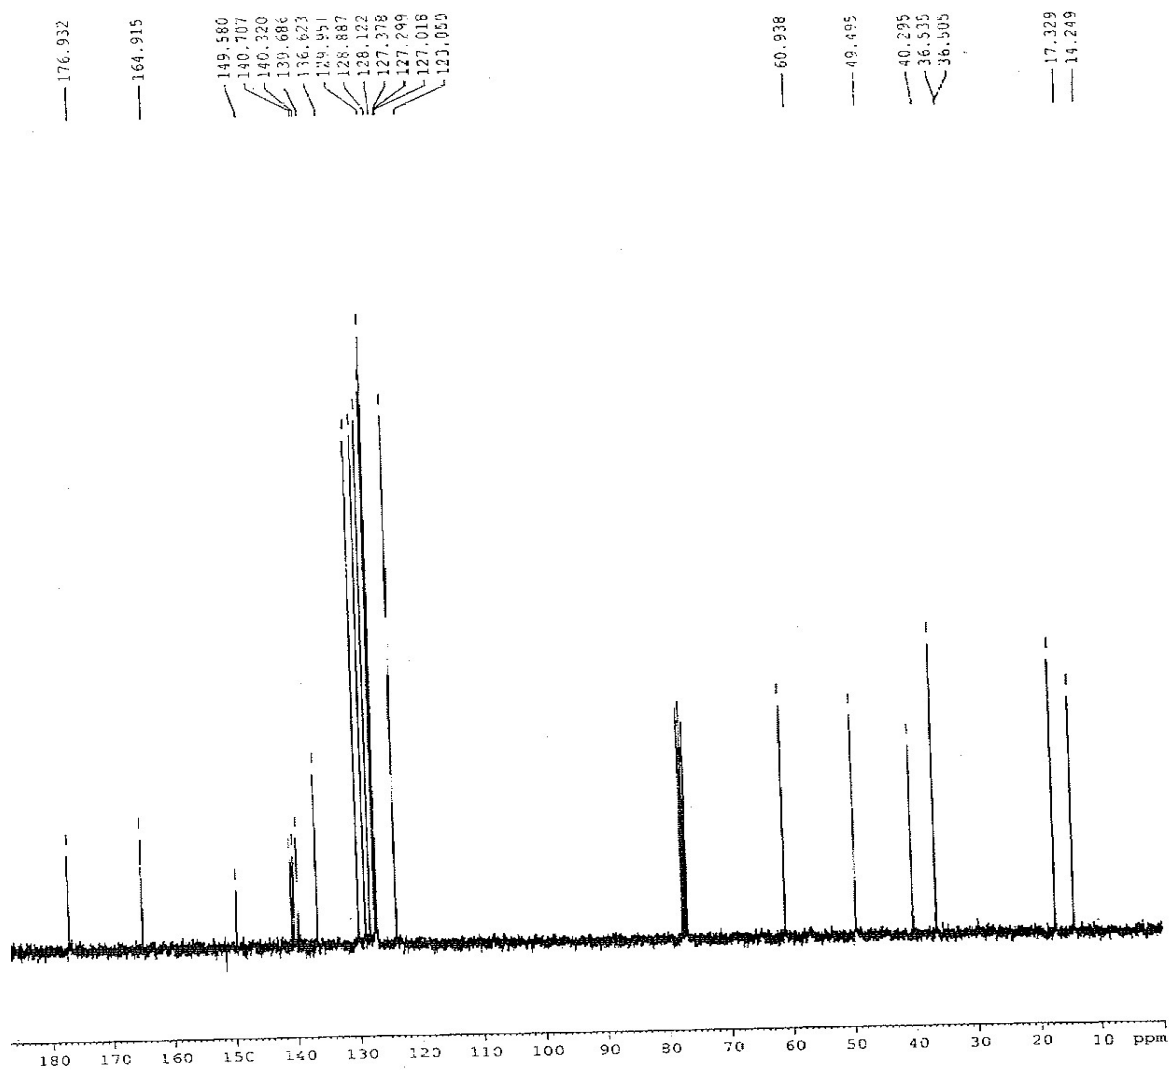

Figure S42: <sup>13</sup>C-NMR (75 MHz, CDCl<sub>3</sub>) spectrum of compound, 5n.

Mass spectrum of compound 5n

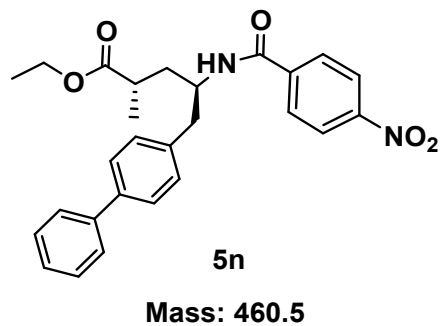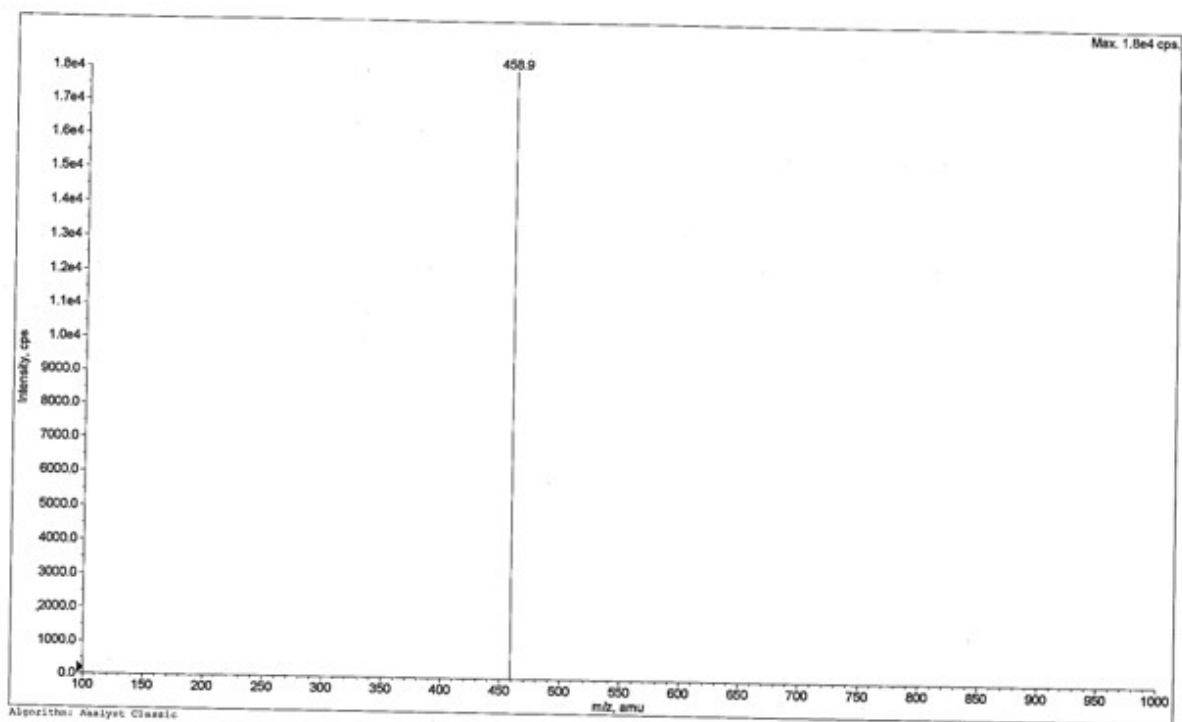

Figure S43: ESI Mass ( $M-H^+$ ) spectrum of compound, 5n.

<sup>1</sup>H NMR Spectrum of compound 5o

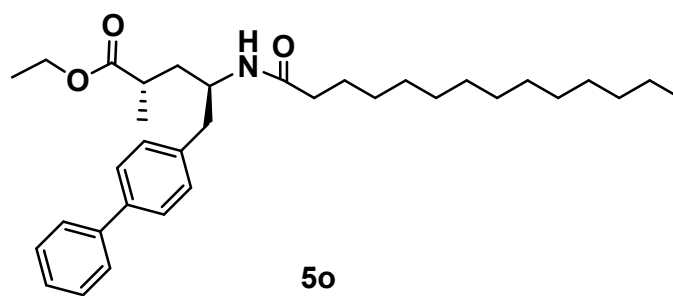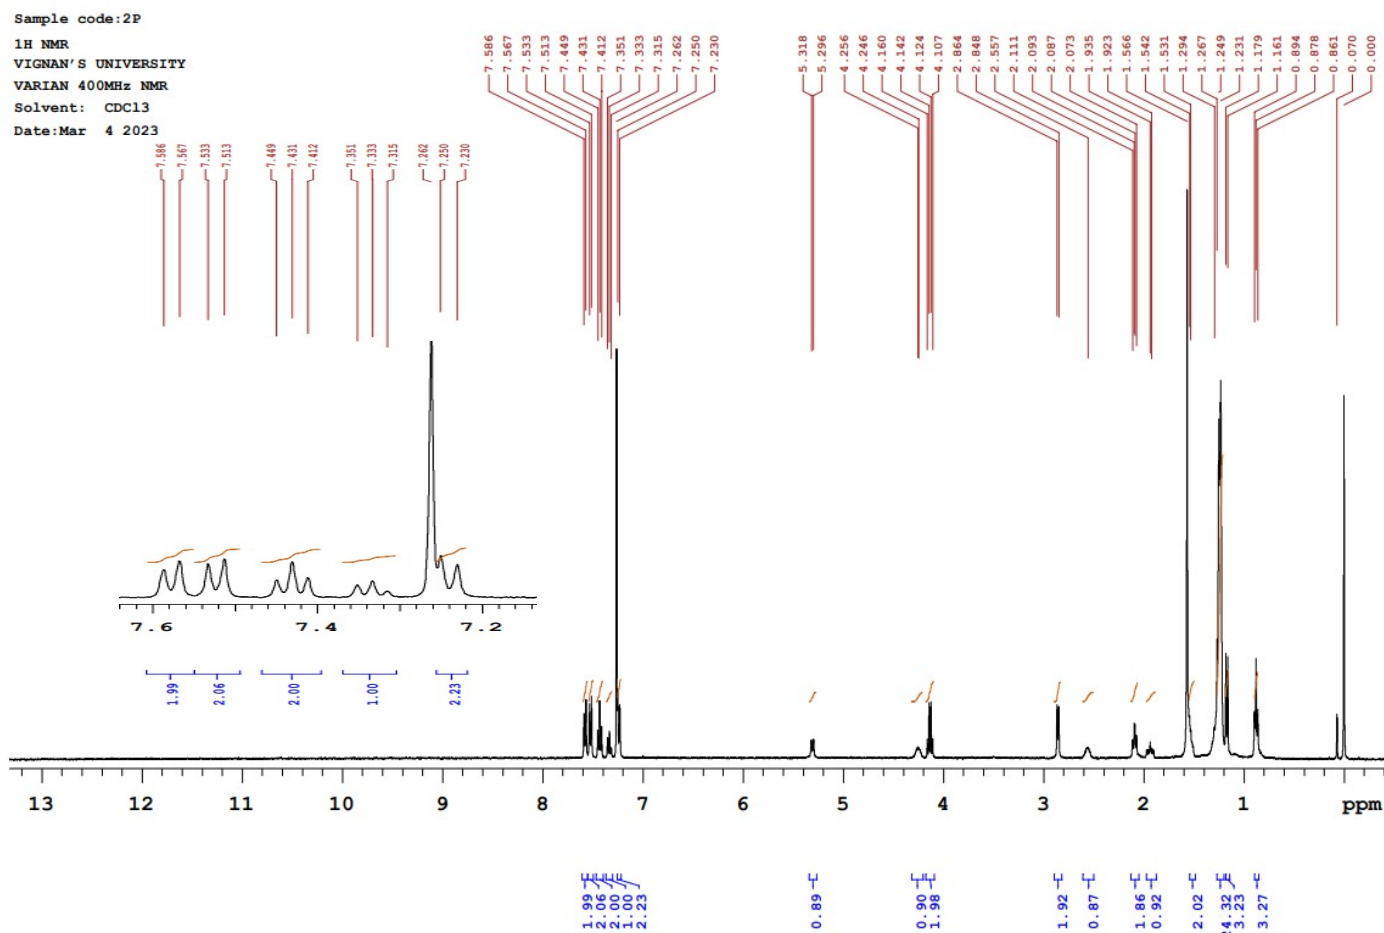

Figure S44: <sup>1</sup>H-NMR (400 MHz, CDCl<sub>3</sub>) spectrum of compound, 5o.

$^{13}\text{C}$  NMR Spectrum of compound 5o

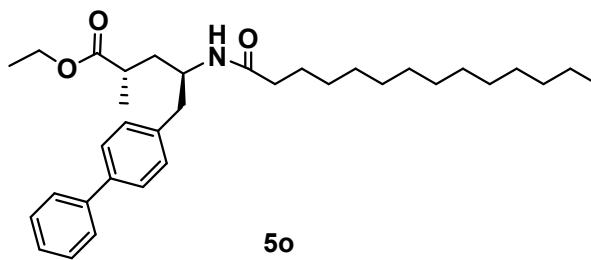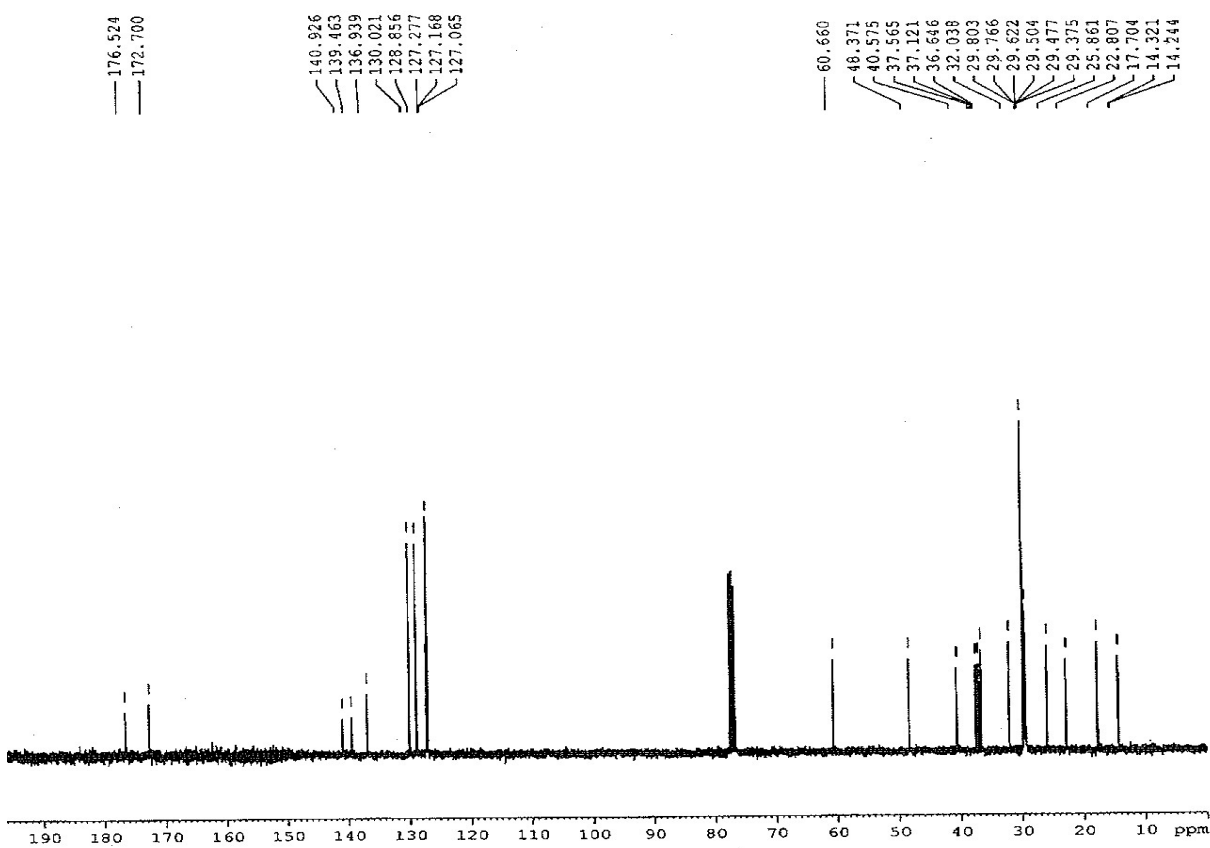

Figure S45:  $^{13}\text{C}$ -NMR (75 MHz,  $\text{CDCl}_3$ ) spectrum of compound, 5o.

Mass spectrum of compound 5o

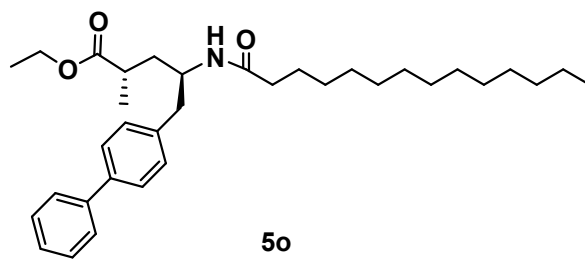

**5o**  
**Mass: 521.3**

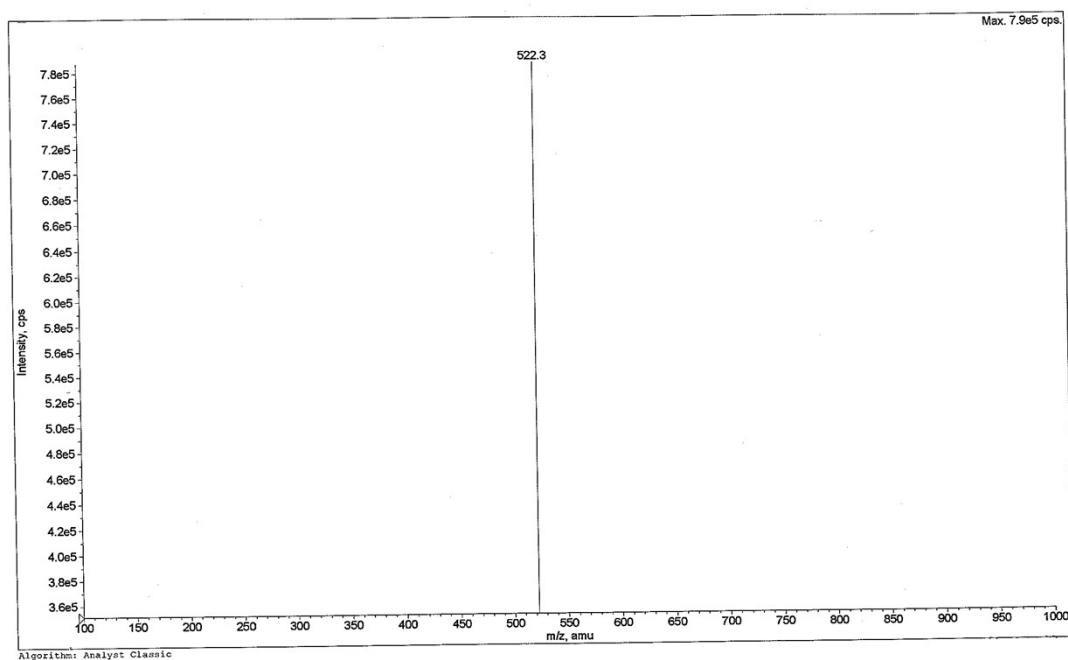

Figure S46: ESI Mass ( $M+H^+$ ) spectrum of compound, 5o.

# <sup>1</sup>H-NMR Spectrum of compound 5p

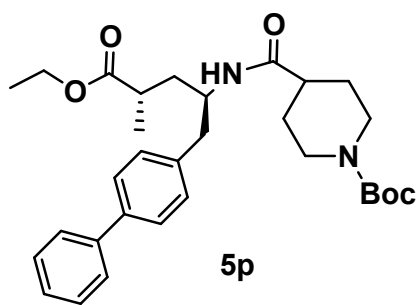

Sample code:2Q  
1H NMR  
VARIAN 400MHz NMR  
Solvent: CDCl3  
Date:Mar 11 2023

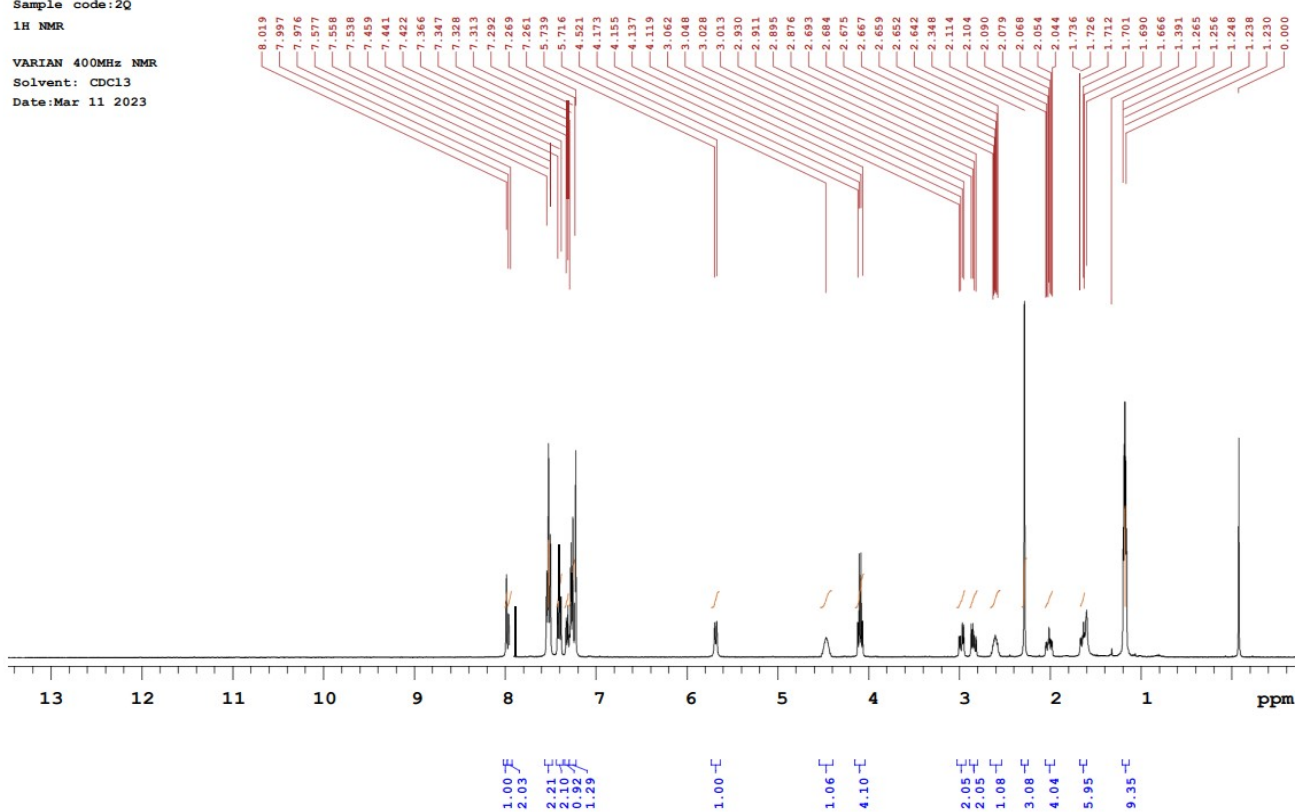

Figure S47: <sup>1</sup>H-NMR (300 MHz, CDCl<sub>3</sub>) spectrum of compound, 5p.

$^{13}\text{C}$  NMR Spectrum of compound 5p

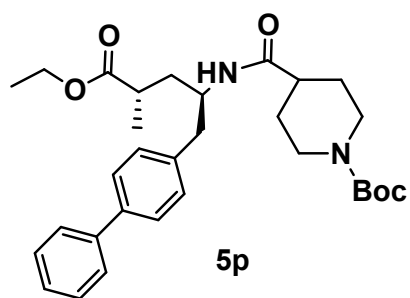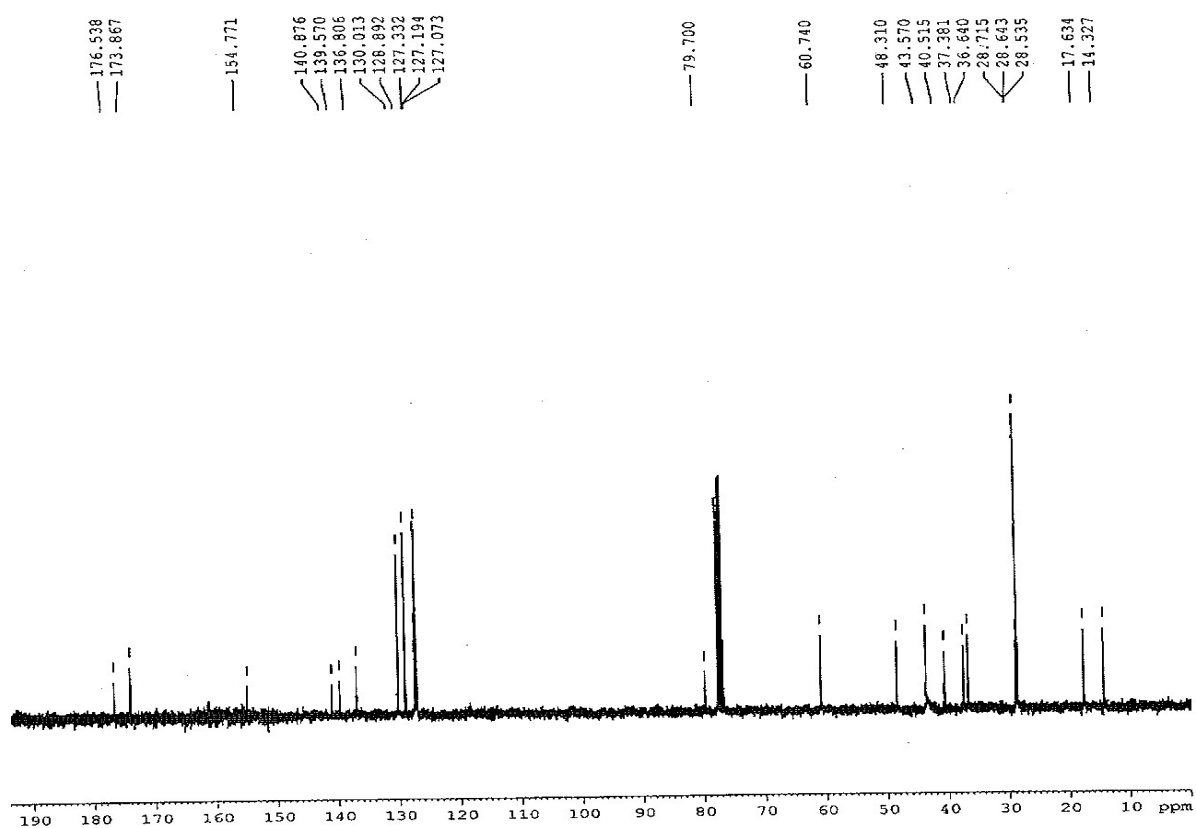

Figure S48:  $^{13}\text{C}$ -NMR (75 MHz,  $\text{CDCl}_3$ ) spectrum of compound, 5p.



Mass spectrum of compound 5p

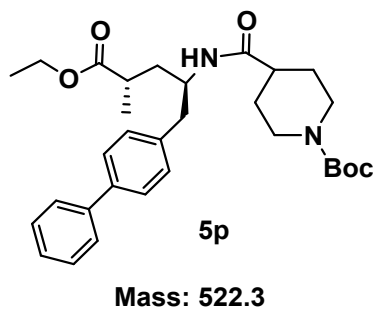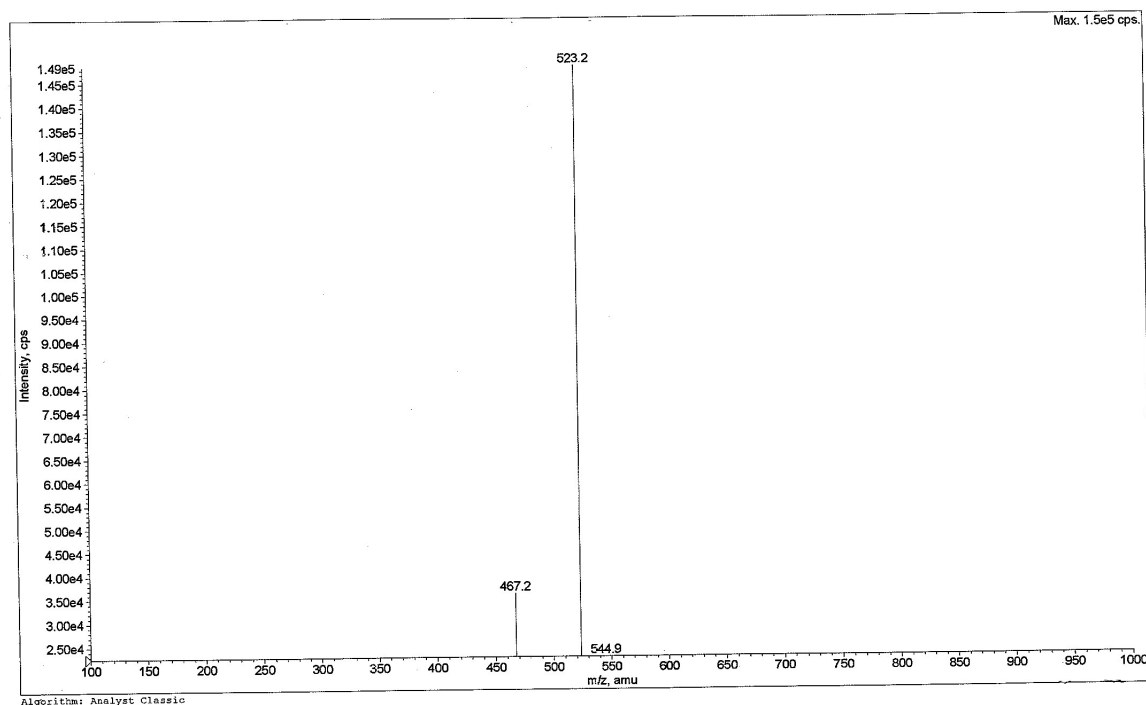

Figure S49: ESI Mass ( $M+H^+$ ) spectrum of compound, 5p.

# $^1\text{H}$ NMR Spectrum of compound 5q

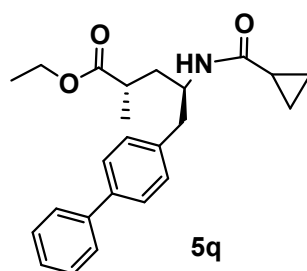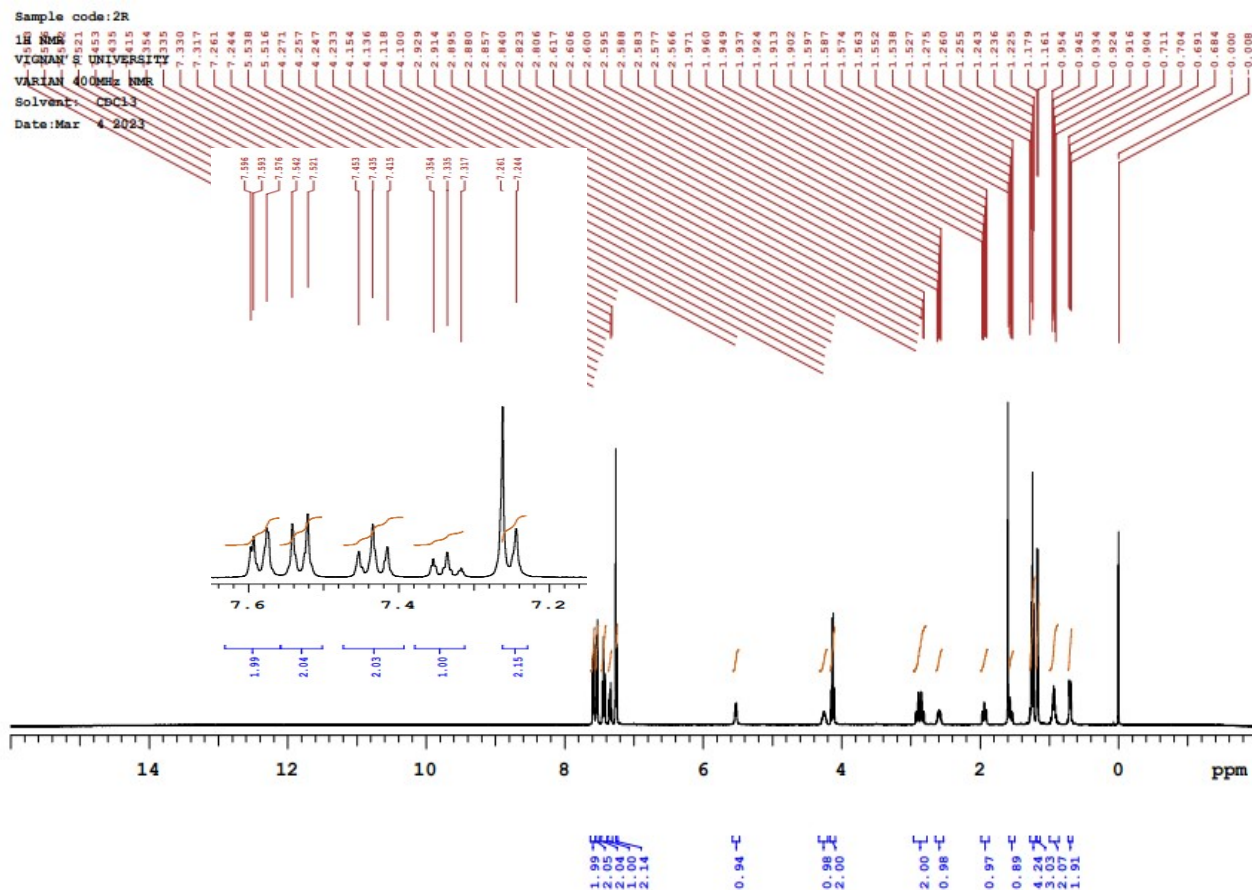

Figure S50:  $^1\text{H}$ -NMR (400 MHz,  $\text{CDCl}_3$ ) spectrum of compound, 5q.

<sup>13</sup>C NMR Spectrum of compound 5q

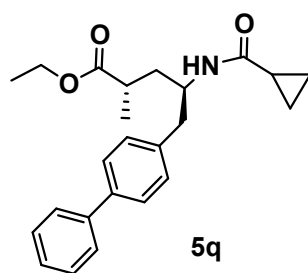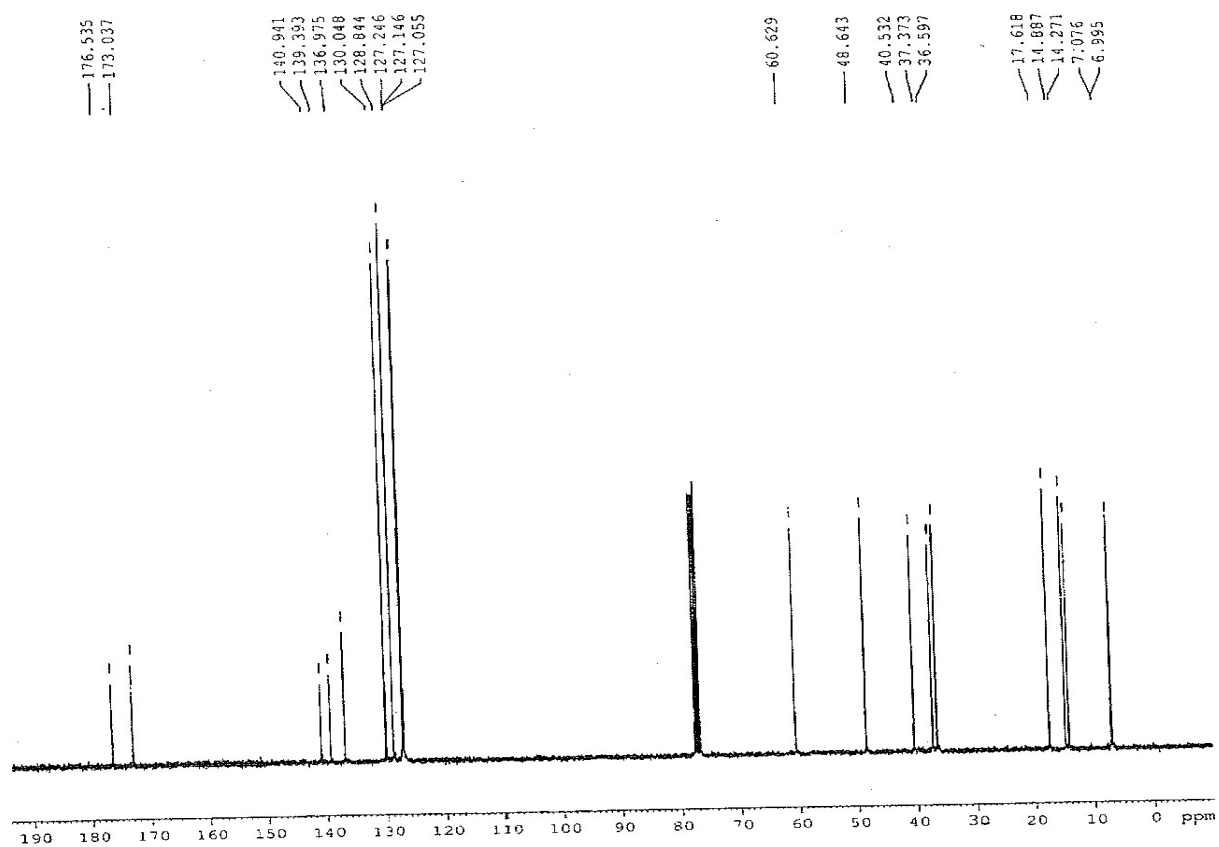

Figure S51: <sup>13</sup>C-NMR (75 MHz, CDCl<sub>3</sub>) spectrum of compound, 5q.

Mass spectrum of compound 5q

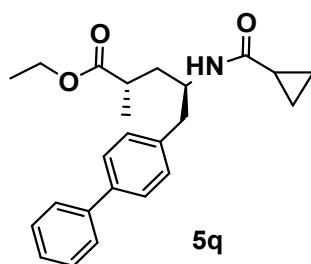

Mass: 379.2

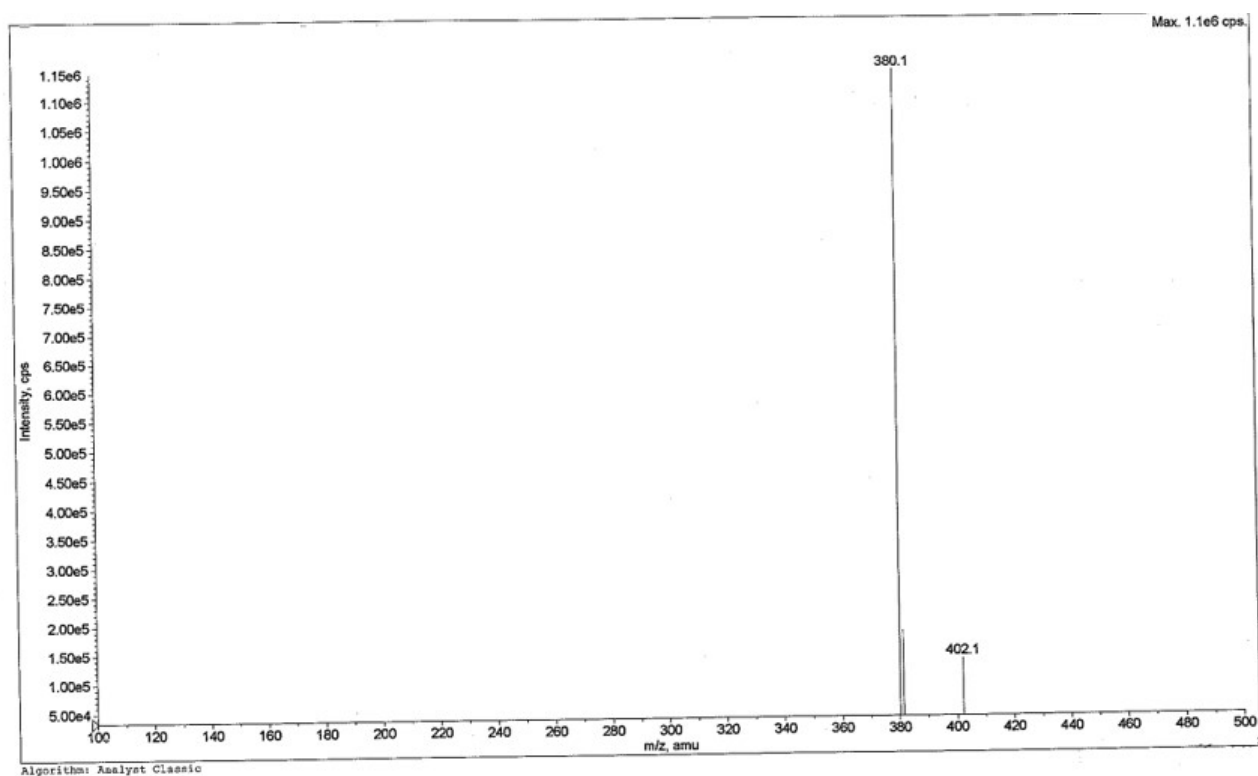

Algorithm: Analyst Classic

Figure S52: ESI Mass ( $M+H^+$ ) spectrum of compound, 5q.

<sup>1</sup>H NMR Spectrum of compound 5r

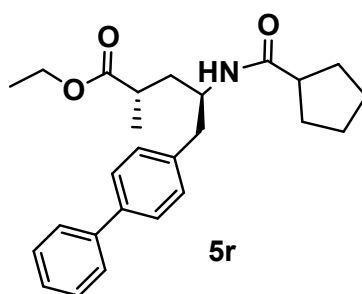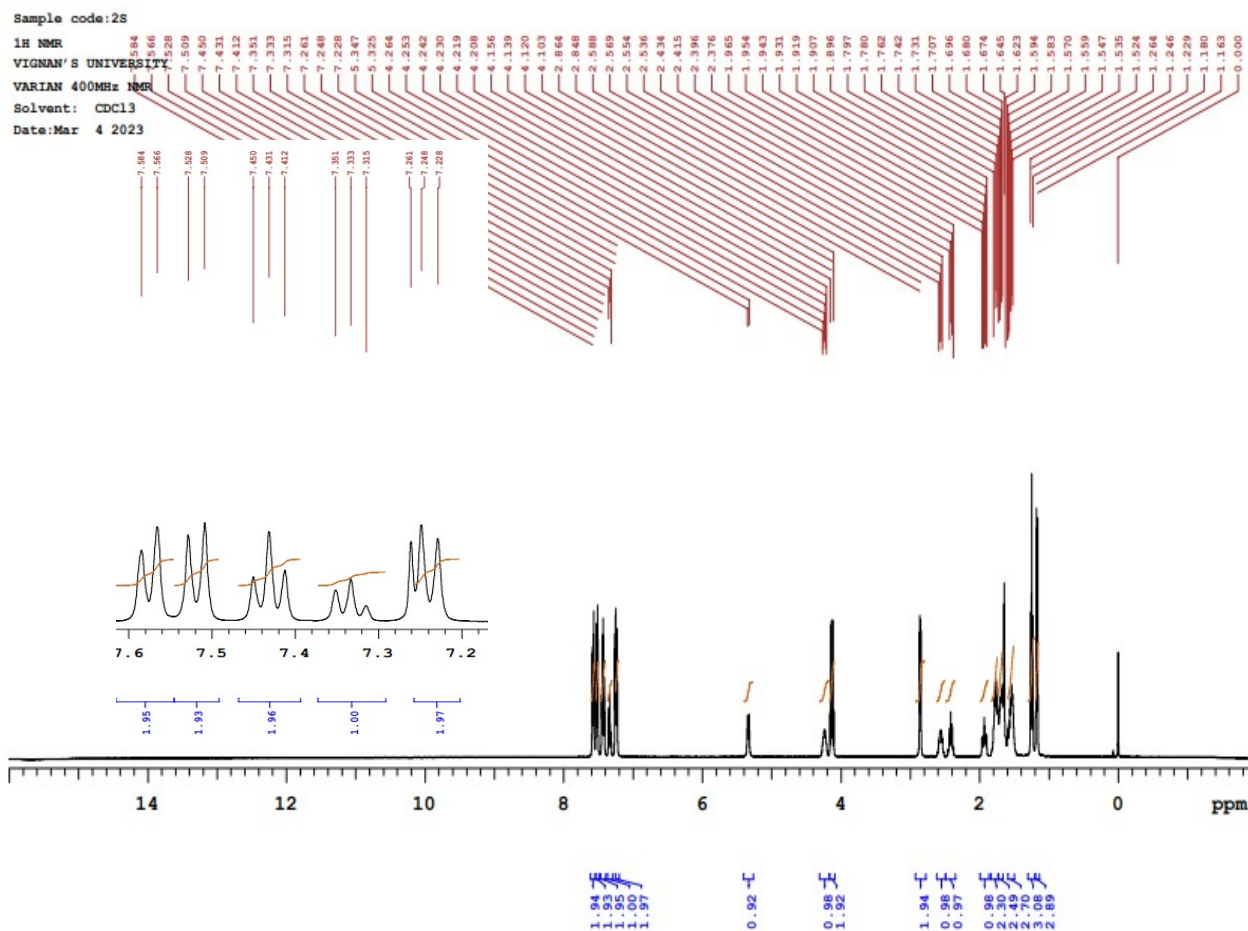

Figure S53: <sup>1</sup>H-NMR (400 MHz, CDCl<sub>3</sub>) spectrum of compound, 5r.

$^{13}\text{C}$  NMR Spectrum of compound 5r

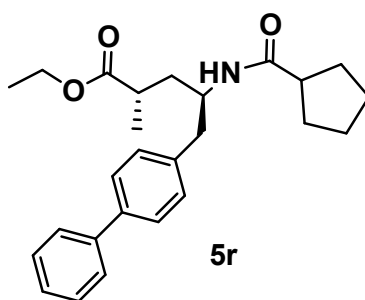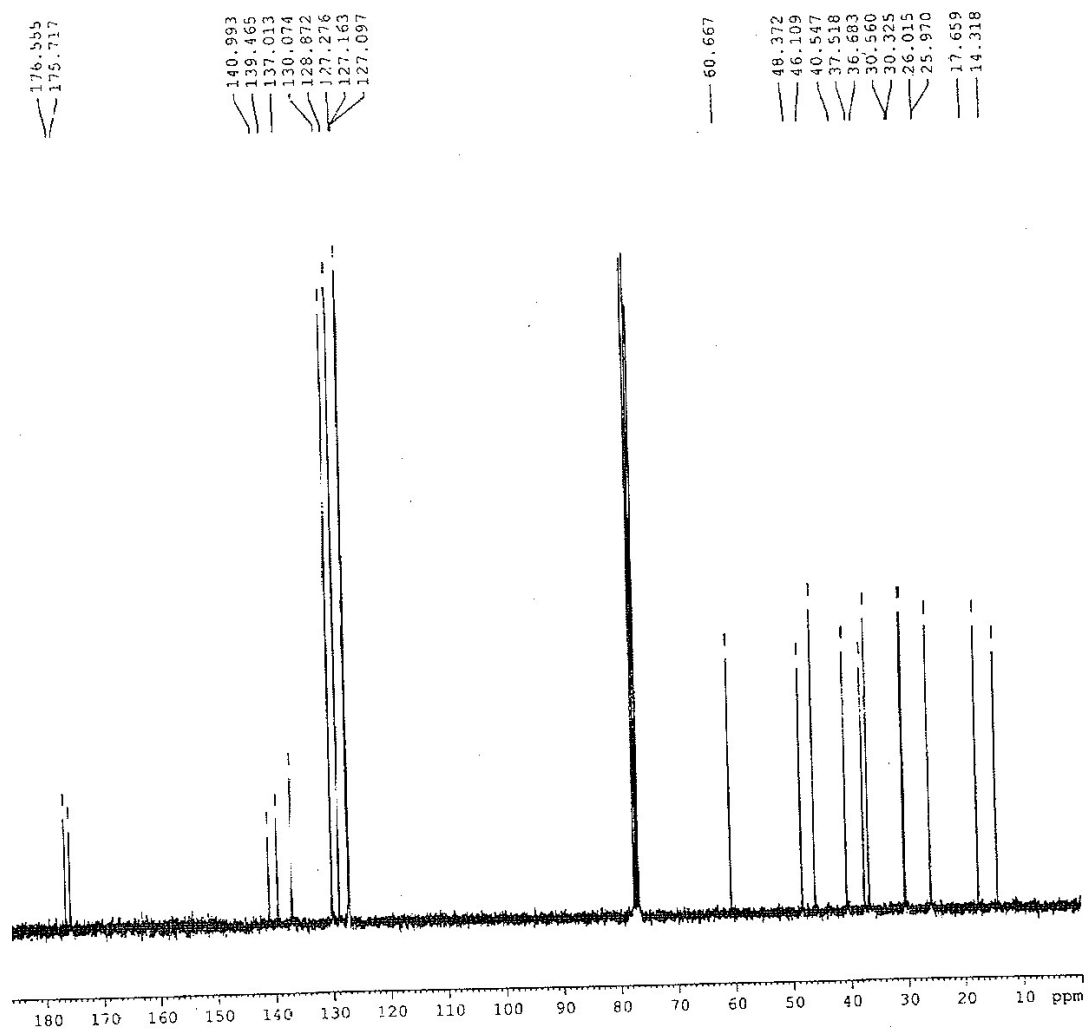

Figure S54:  $^{13}\text{C}$ -NMR (75 MHz,  $\text{CDCl}_3$ ) spectrum of compound, 5r.

Mass spectrum of compound 5r

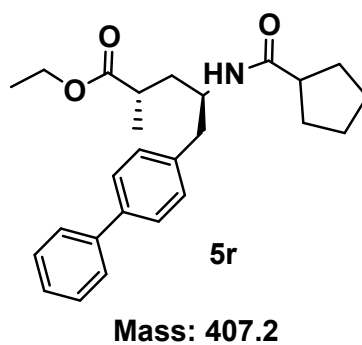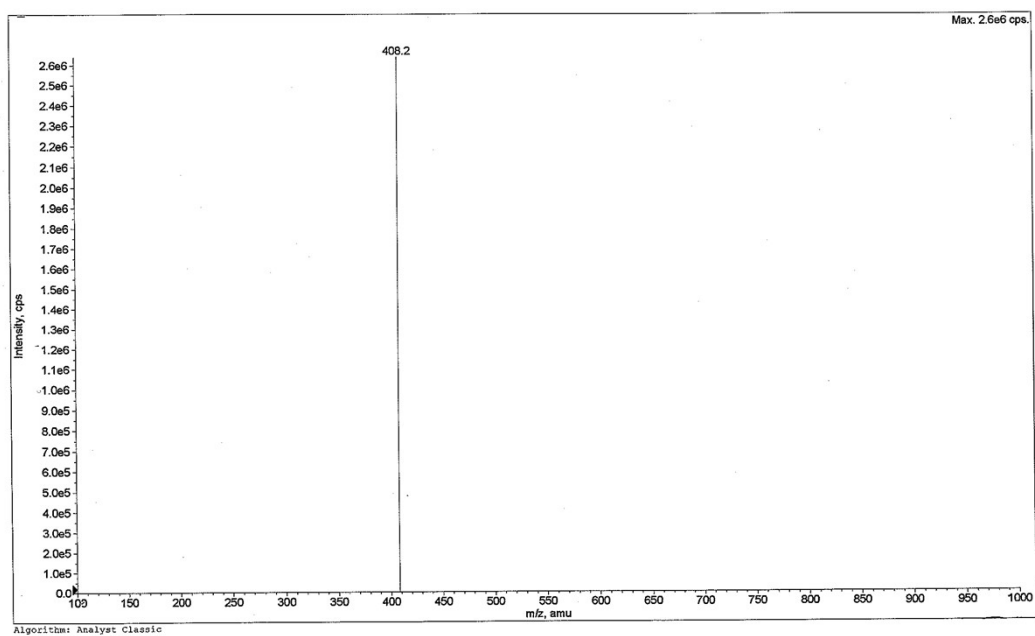

Figure S55: ESI Mass ( $M+H^+$ ) spectrum of compound, 5r.

<sup>1</sup>H NMR Spectrum of compound 5s

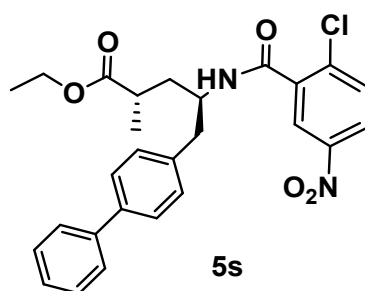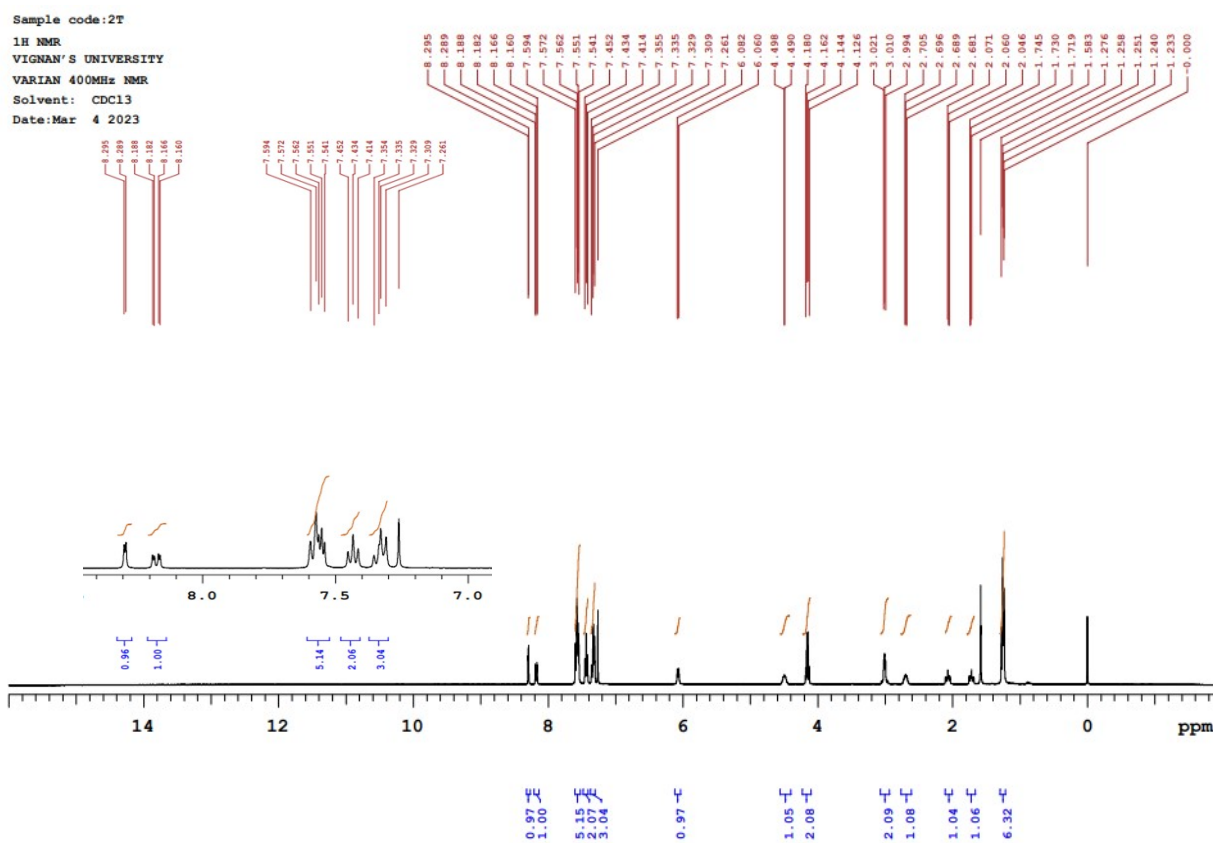

Figure S56: <sup>1</sup>H-NMR (400 MHz, CDCl<sub>3</sub>) spectrum of compound, 5s.



<sup>13</sup>C NMR Spectrum of compound 5s

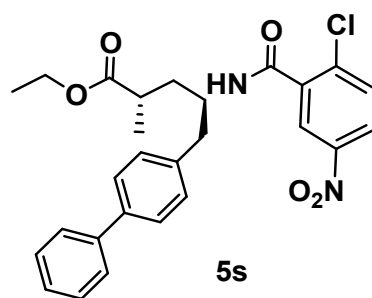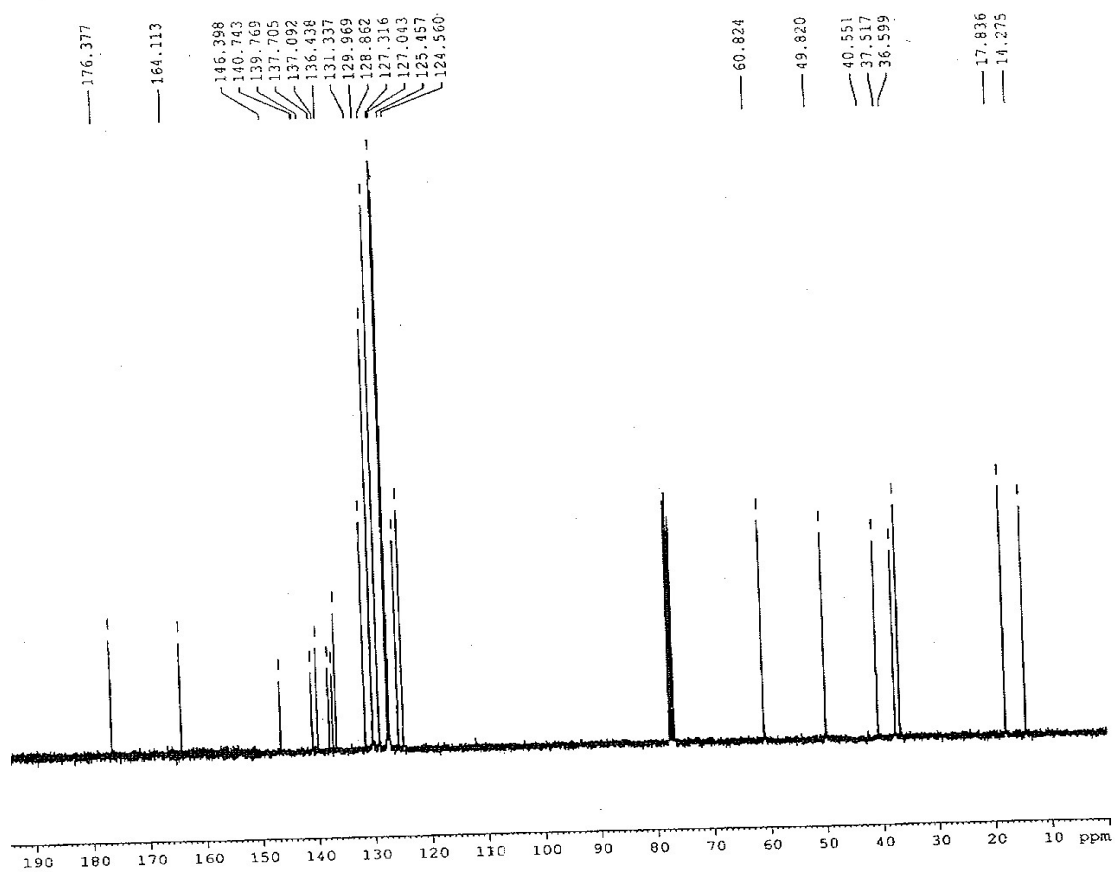

Figure S57: <sup>13</sup>C-NMR (75 MHz, CDCl<sub>3</sub>) spectrum of compound, 5s.

Mass spectrum of compound 5s

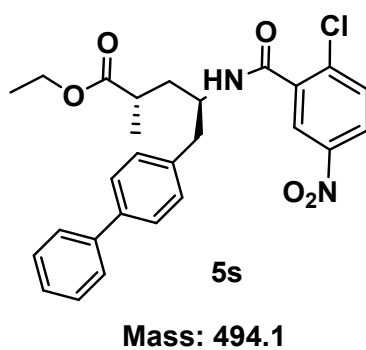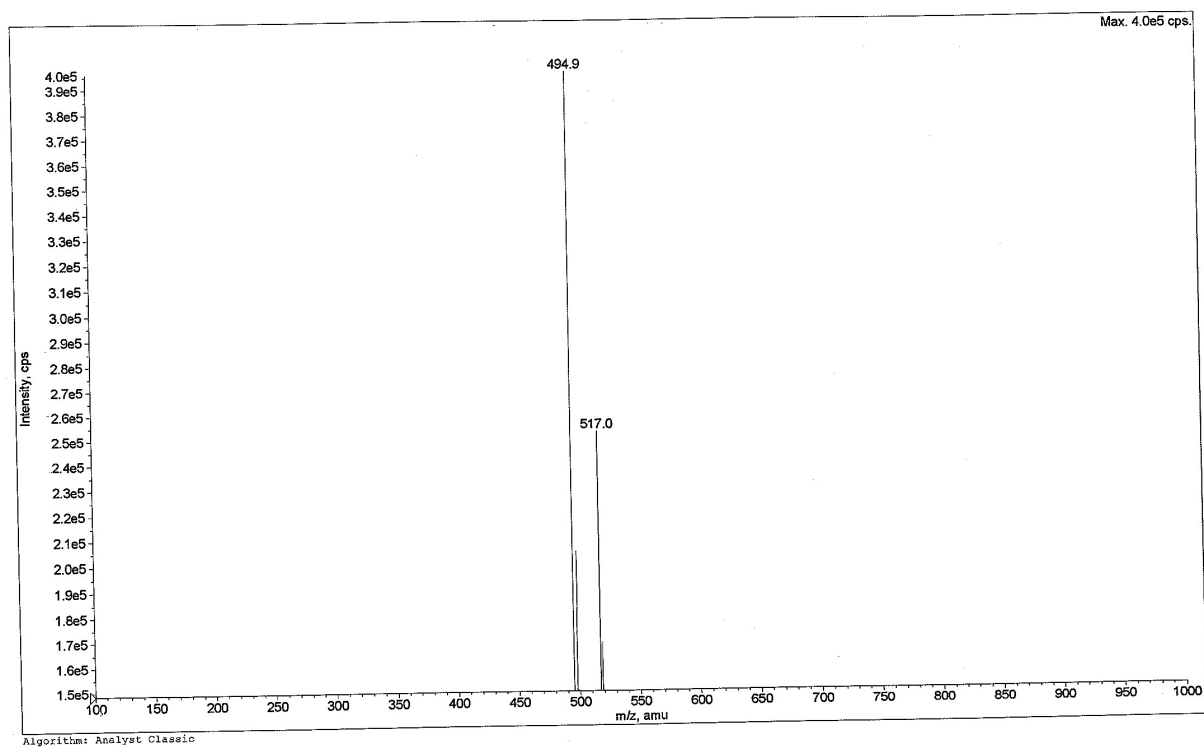

Figure S58: ESI Mass ( $M+H^+$ ) spectrum of compound, 5s.

<sup>1</sup>H NMR Spectrum of compound 5t

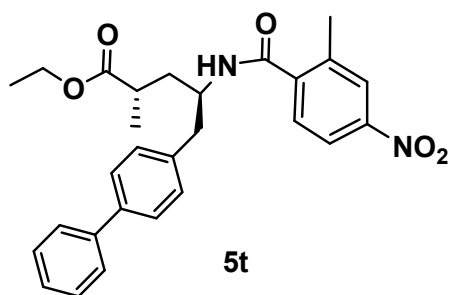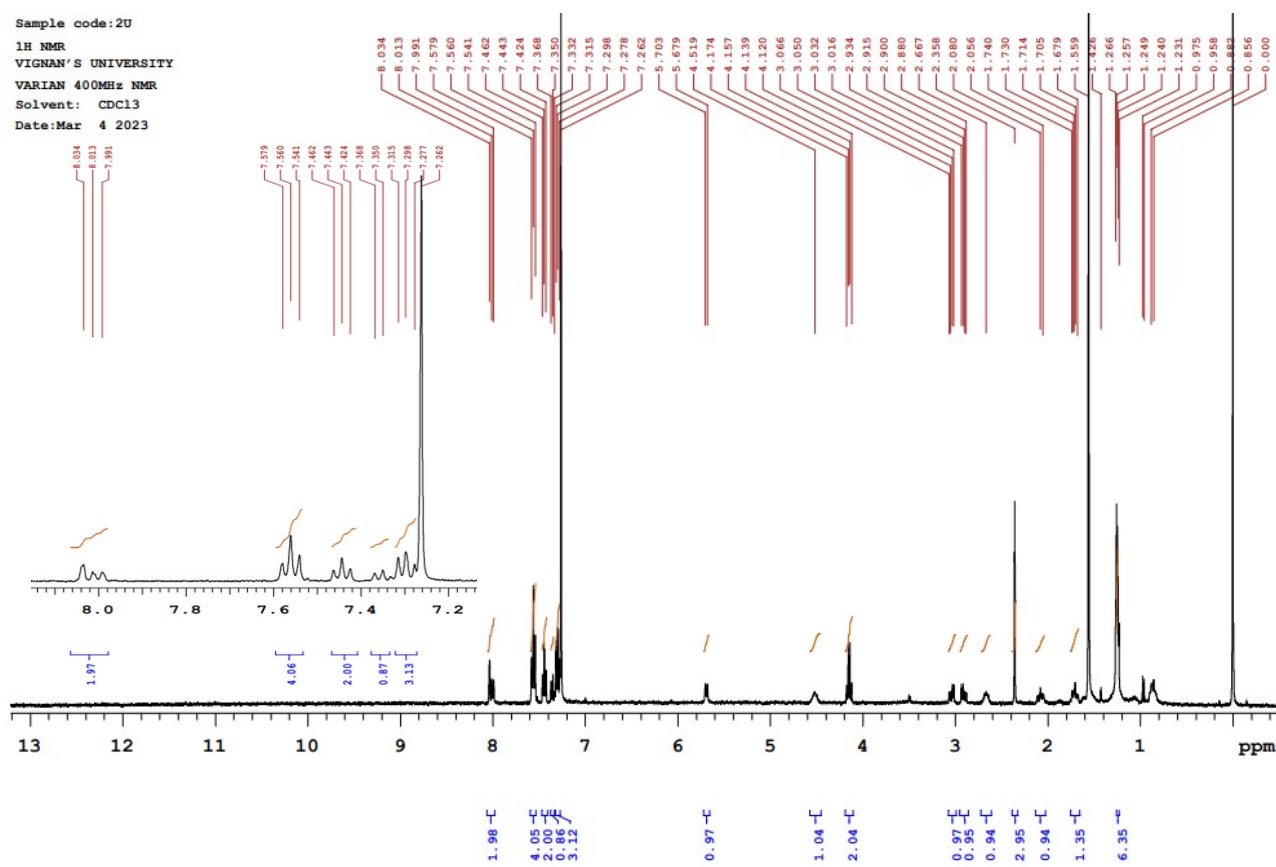

Figure S59: <sup>1</sup>H-NMR (400 MHz, CDCl<sub>3</sub>) spectrum of compound, 5t.

<sup>13</sup>C NMR Spectrum of compound 5t

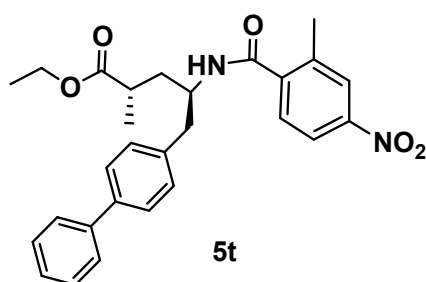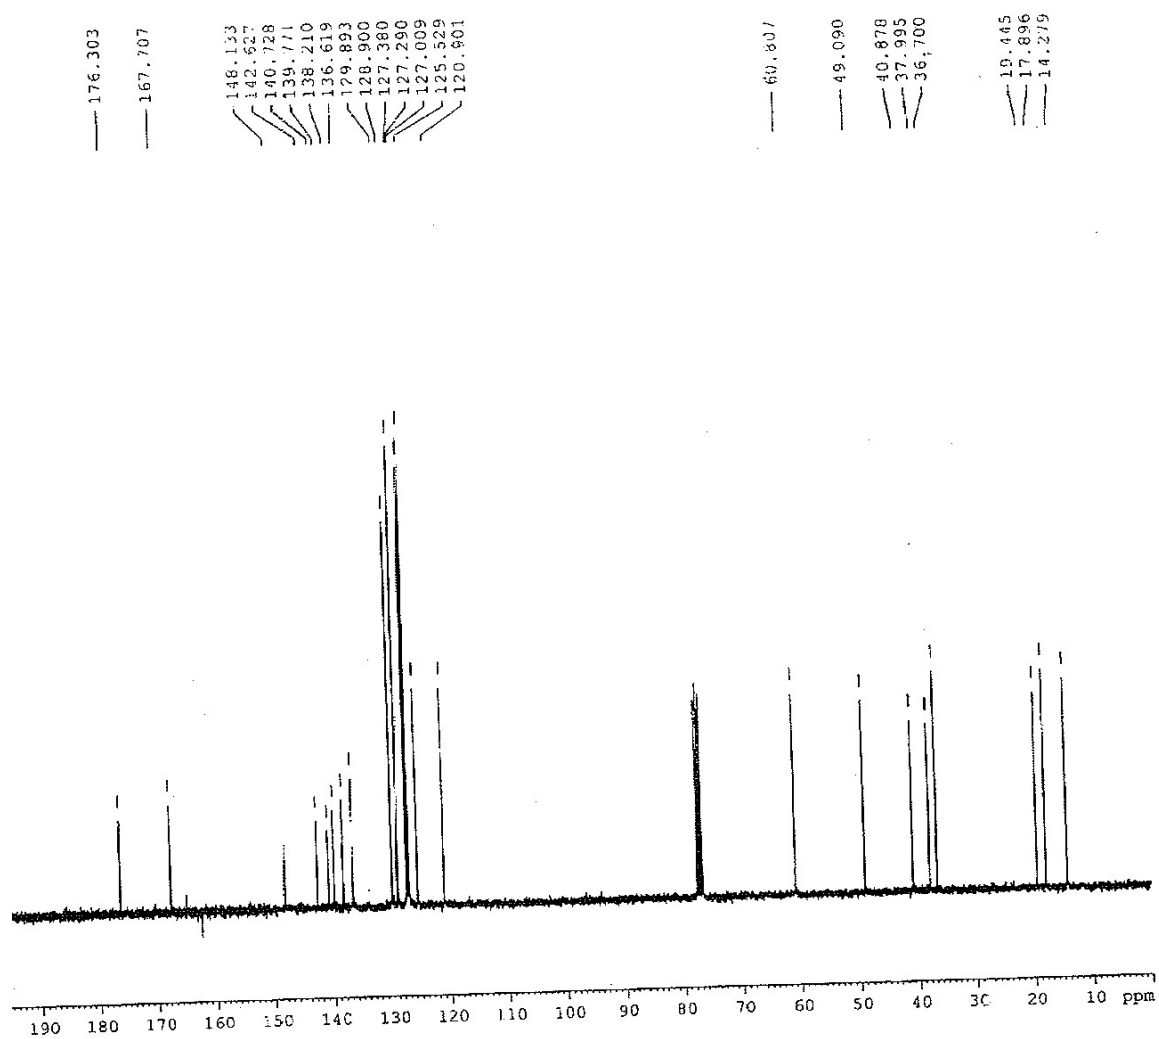

Figure S60: <sup>13</sup>C-NMR (75 MHz, CDCl<sub>3</sub>) spectrum of compound, 5t.

Mass spectrum of compound 5t

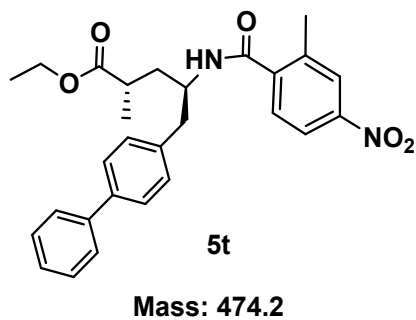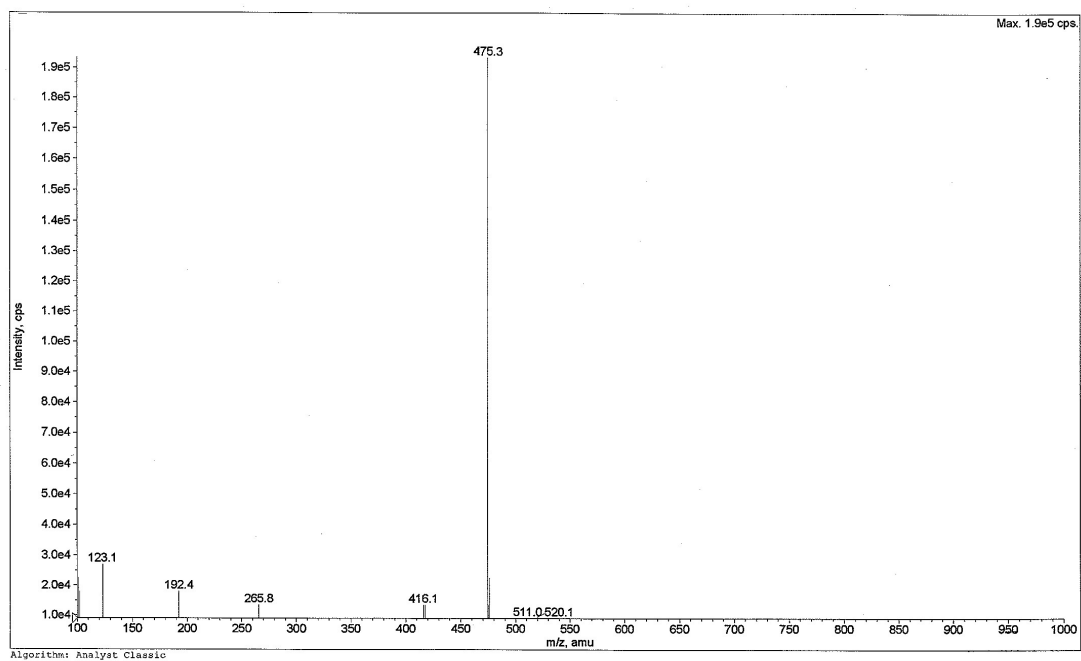

Figure S61: ESI Mass ( $M+H^+$ ) spectrum of compound, 5t.

# <sup>1</sup>H NMR Spectrum of compound 5u

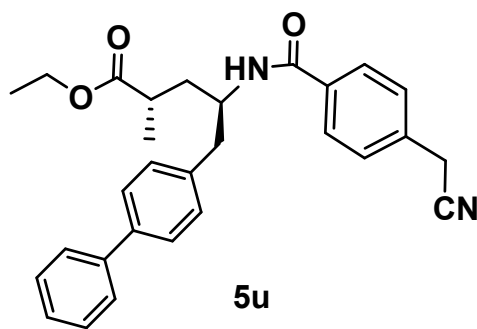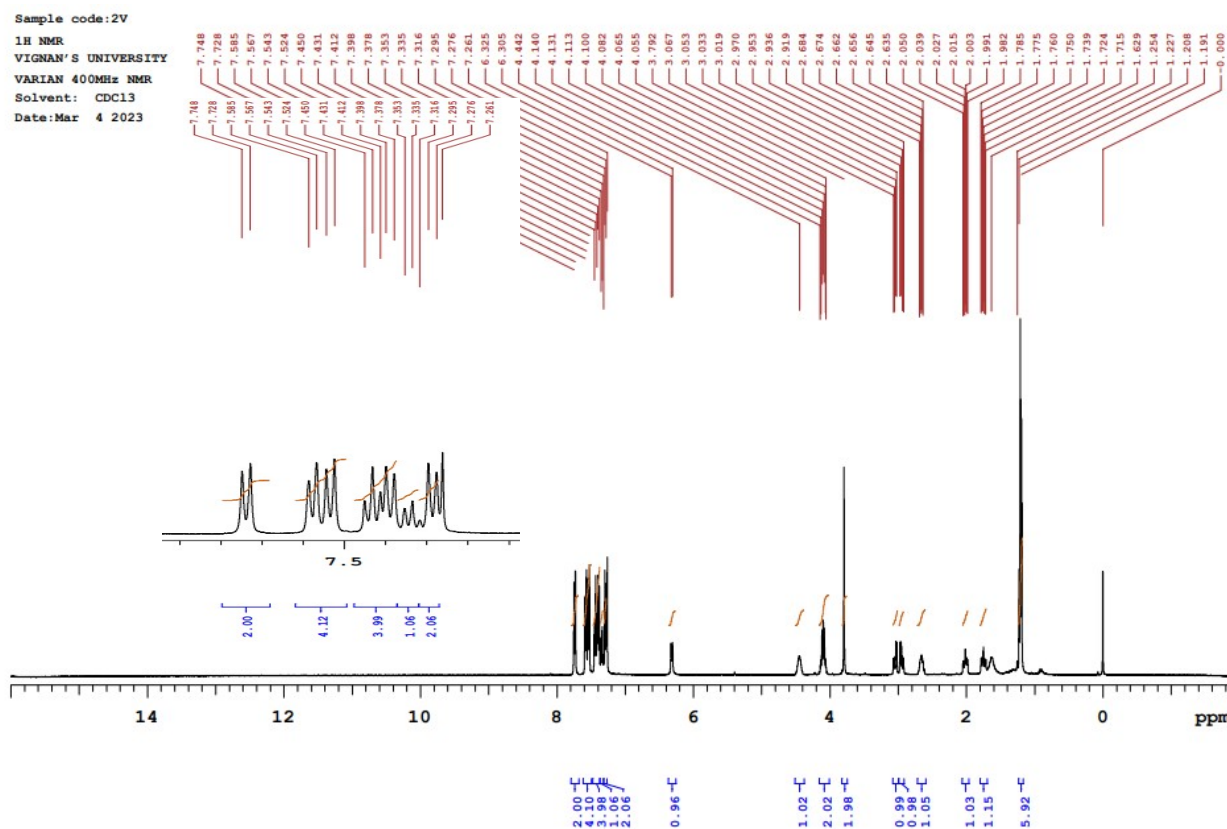

Figure S62: <sup>1</sup>H-NMR (400 MHz, CDCl<sub>3</sub>) spectrum of compound, 5u.

<sup>13</sup>C NMR Spectrum of compound 5u

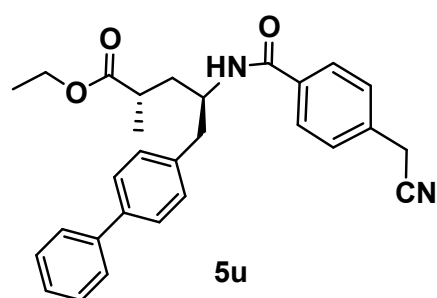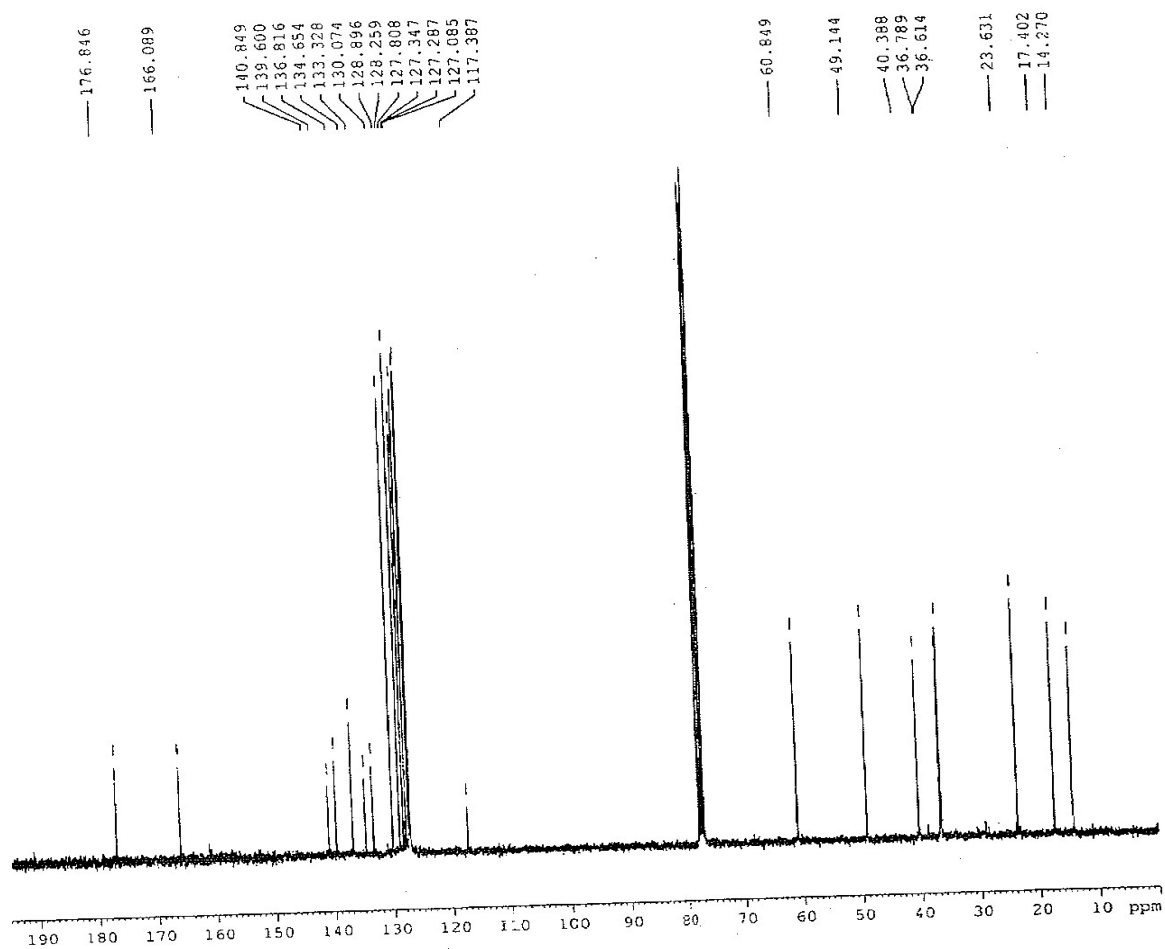

Figure S63: <sup>13</sup>C-NMR (75 MHz, CDCl<sub>3</sub>) spectrum of compound, 5u.

Mass spectrum of compound 5u

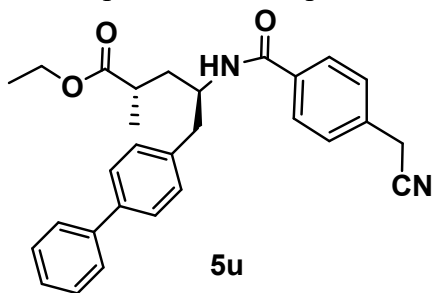

5u

Mass: 454.2

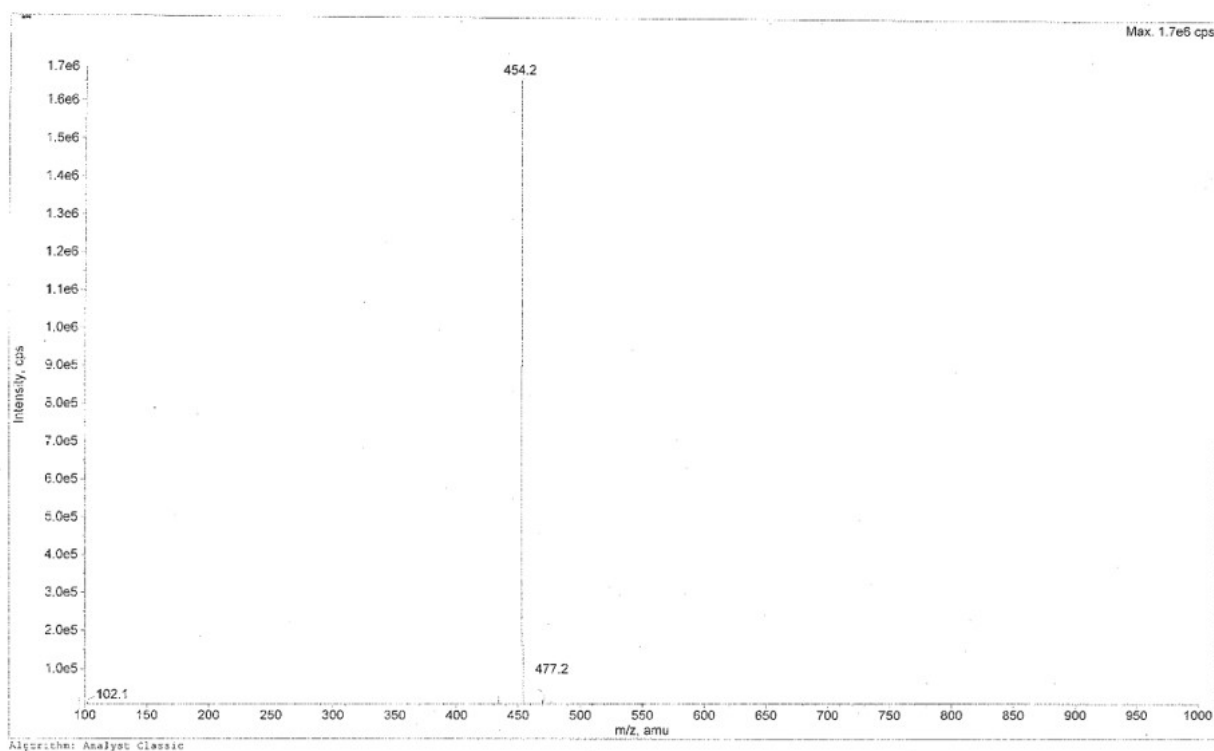

Figure S64: ES-I Mass ( $M+H$ ) spectrum of compound, 5u.



# <sup>1</sup>H NMR Spectrum of compound 5v

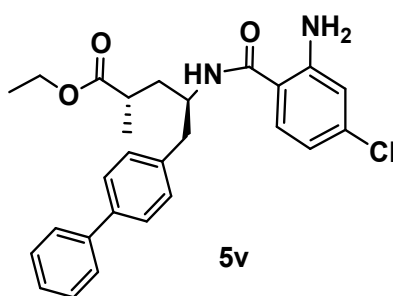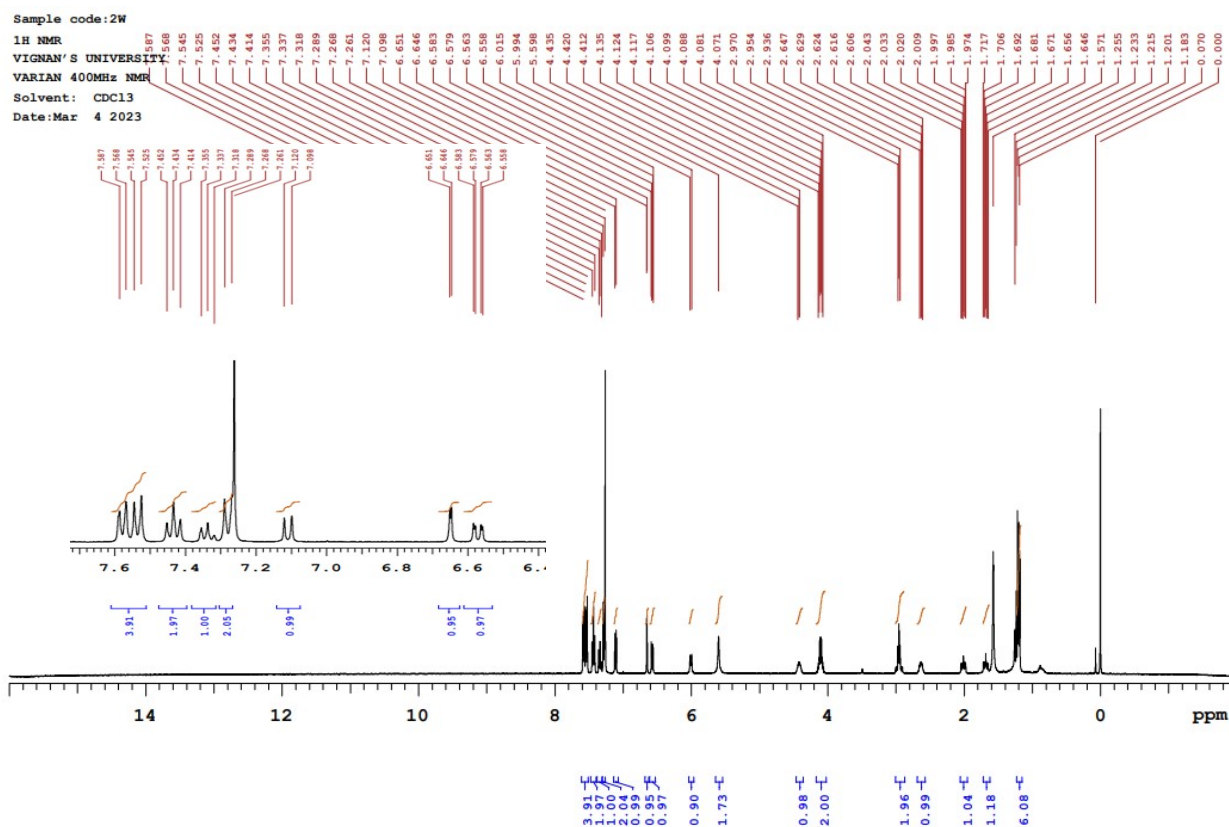

Figure S65: <sup>1</sup>H-NMR (400 MHz, CDCl<sub>3</sub>) spectrum of compound, 5v.

$^{13}\text{C}$  NMR Spectrum of compound 5v

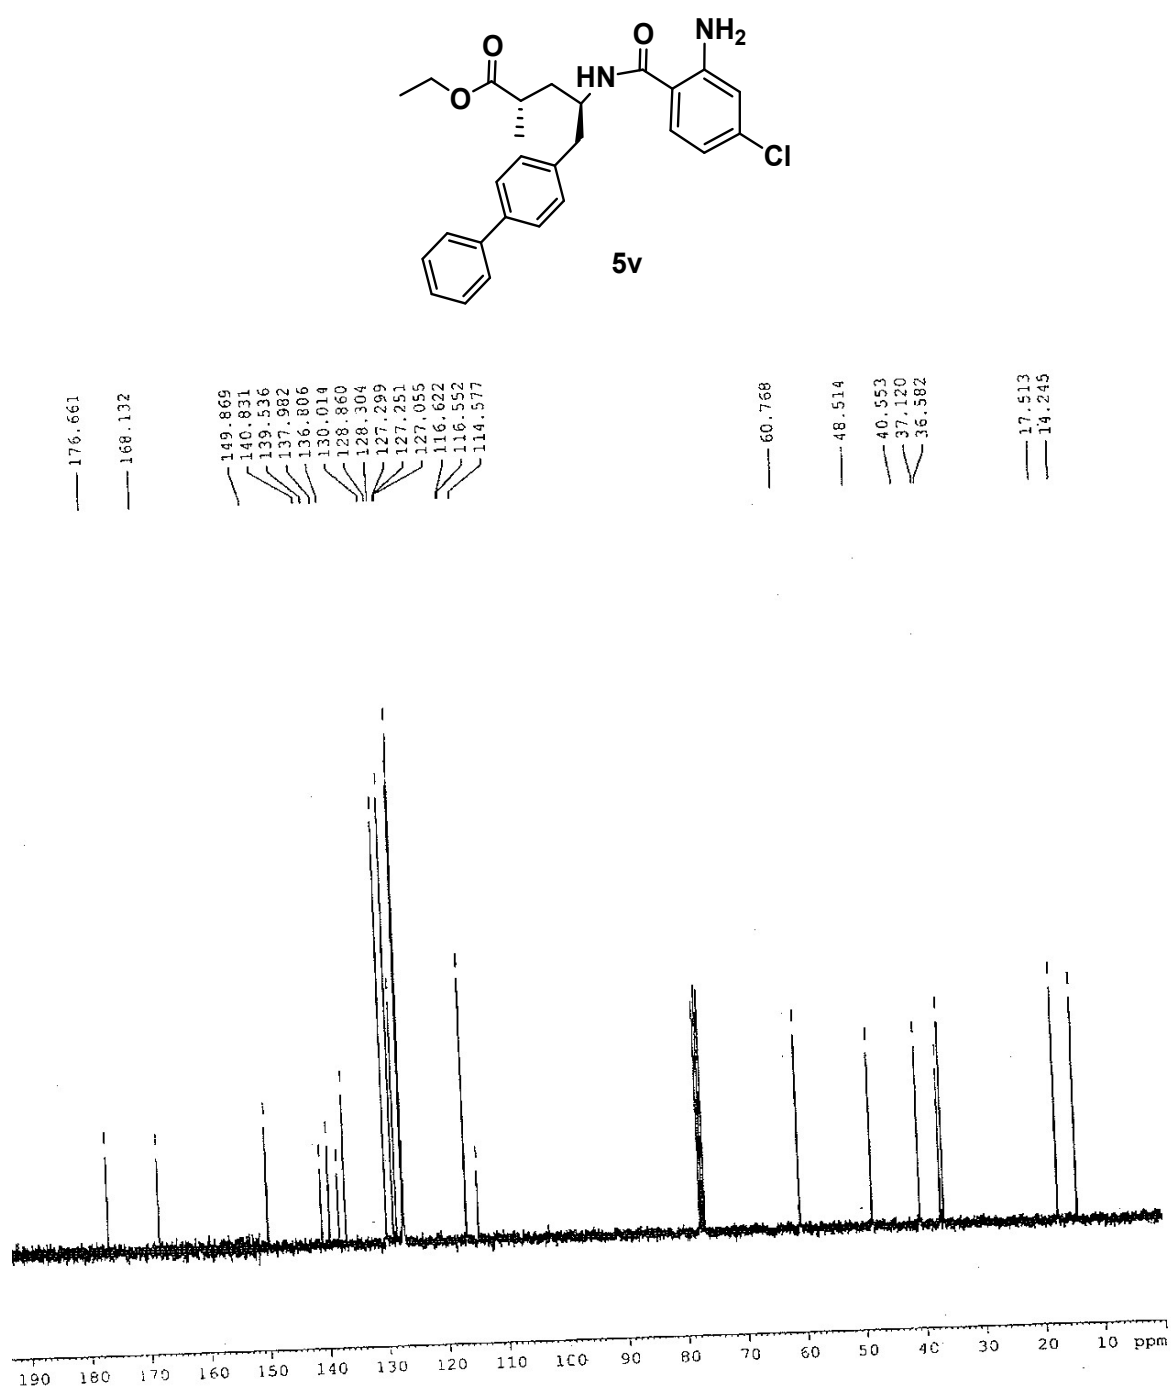

Figure S66:  $^{13}\text{C}$ -NMR (75 MHz,  $\text{CDCl}_3$ ) spectrum of compound, 5v.

Mass spectrum of compound 5v

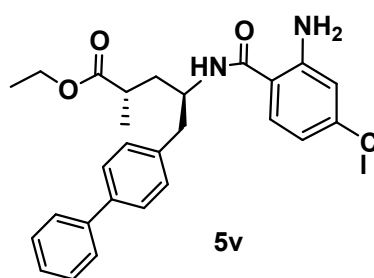

5v

Mass: 464.1

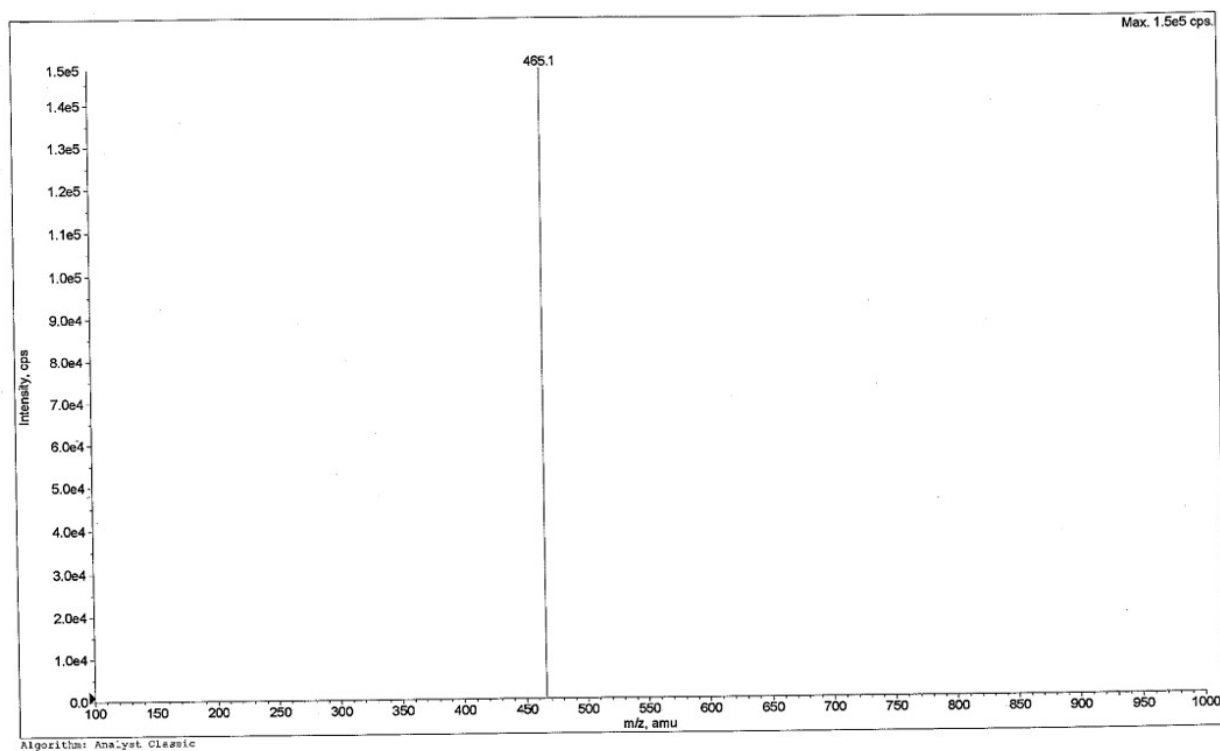

Figure S67: ESI Mass ( $M+H^+$ ) spectrum of compound, 5v.

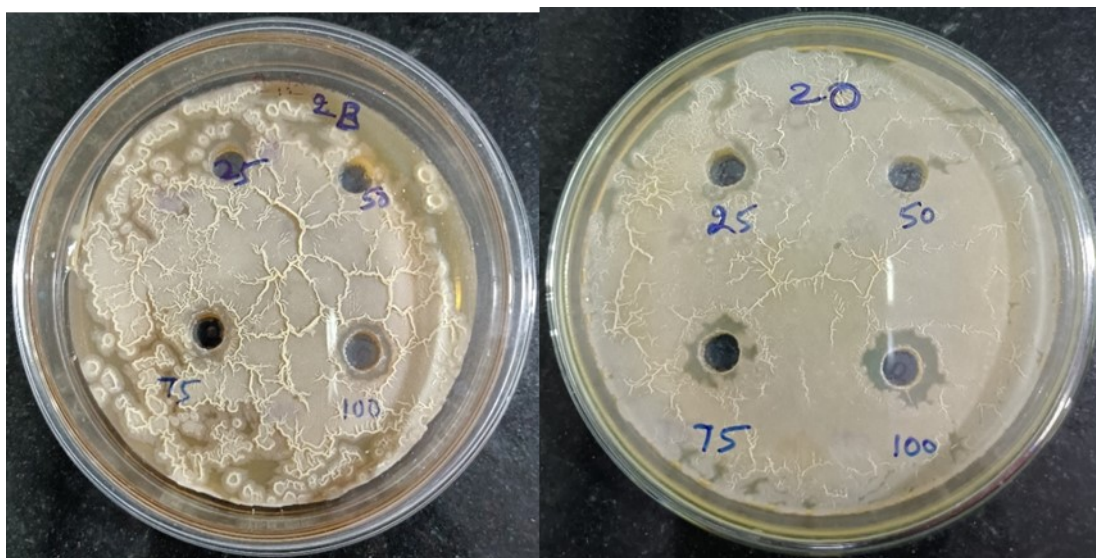

Figure S68. Determination of antifungal activities values for the compounds 5b, and 5n and codes for 2B, and 2O, respectively using *Candida albicans* *Fungi*.

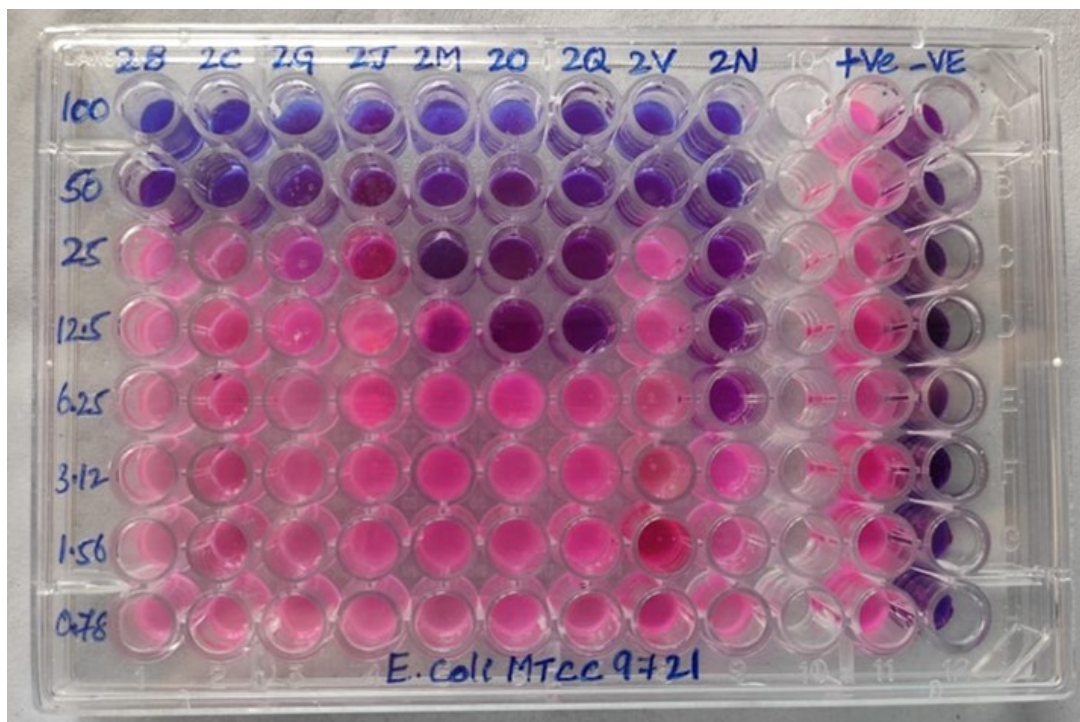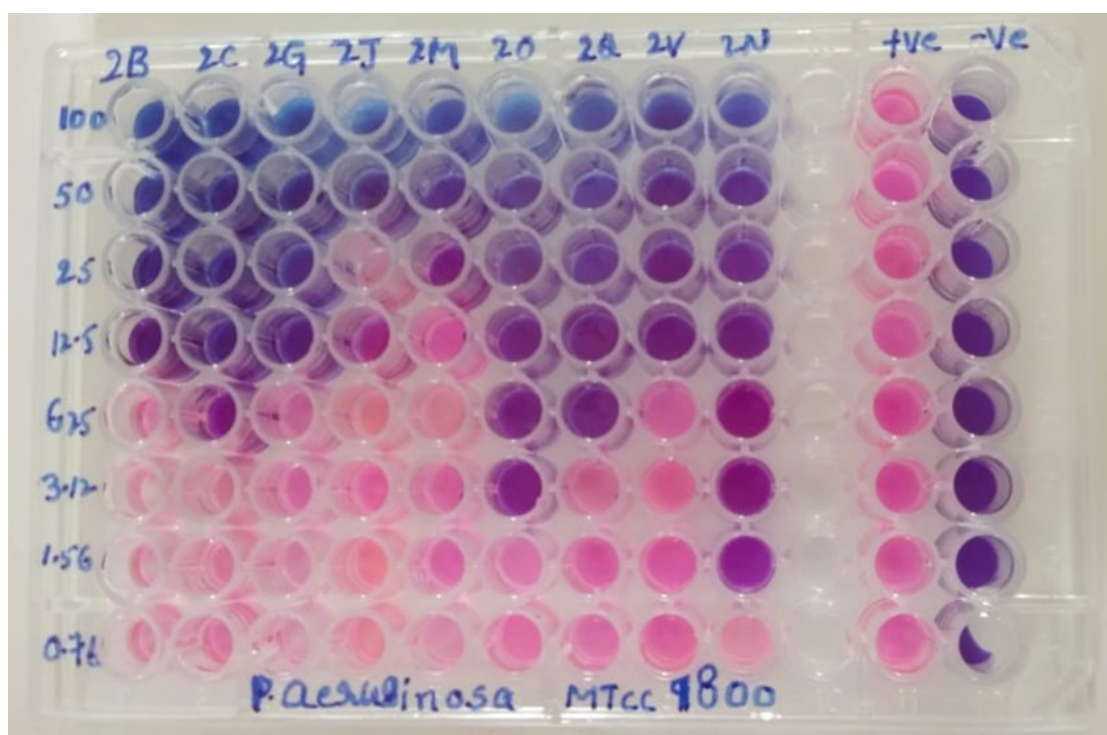

Figure S69. Determination of antibacterial activities MIC values for the compounds 5b, 5c, 5g, 5i, 5l, 5m, 5n, 5p and 5u and codes for 2B, 2C, 2G, 2J, 2M, 2O, 2Q, 2V and 2N, respectively using *E. coli* and *P. aeruginosa* bacteria.

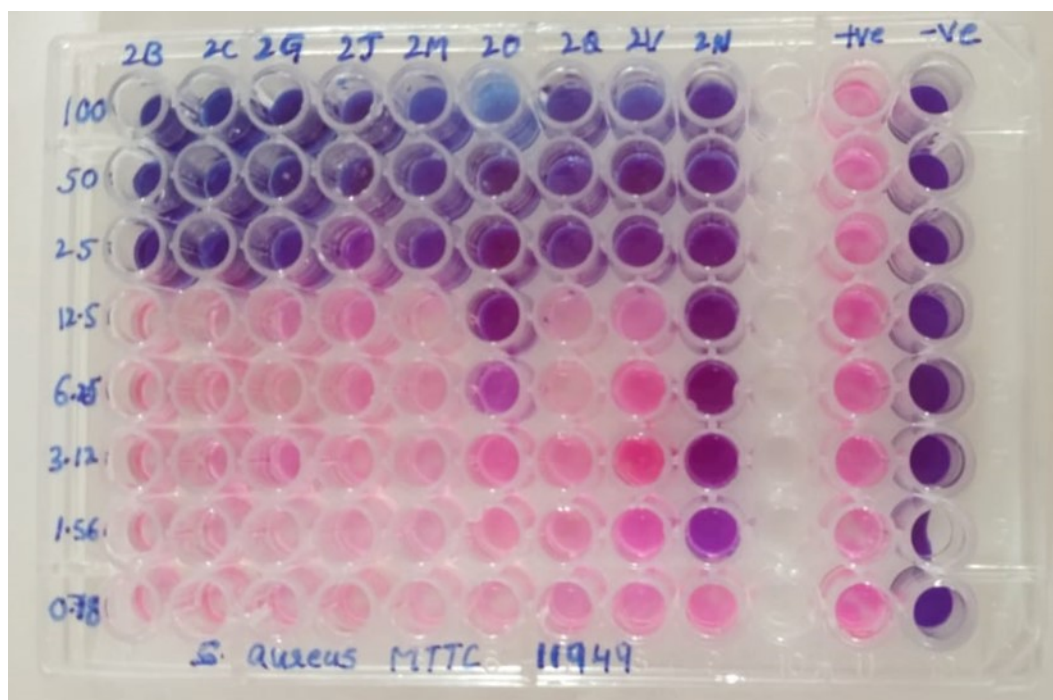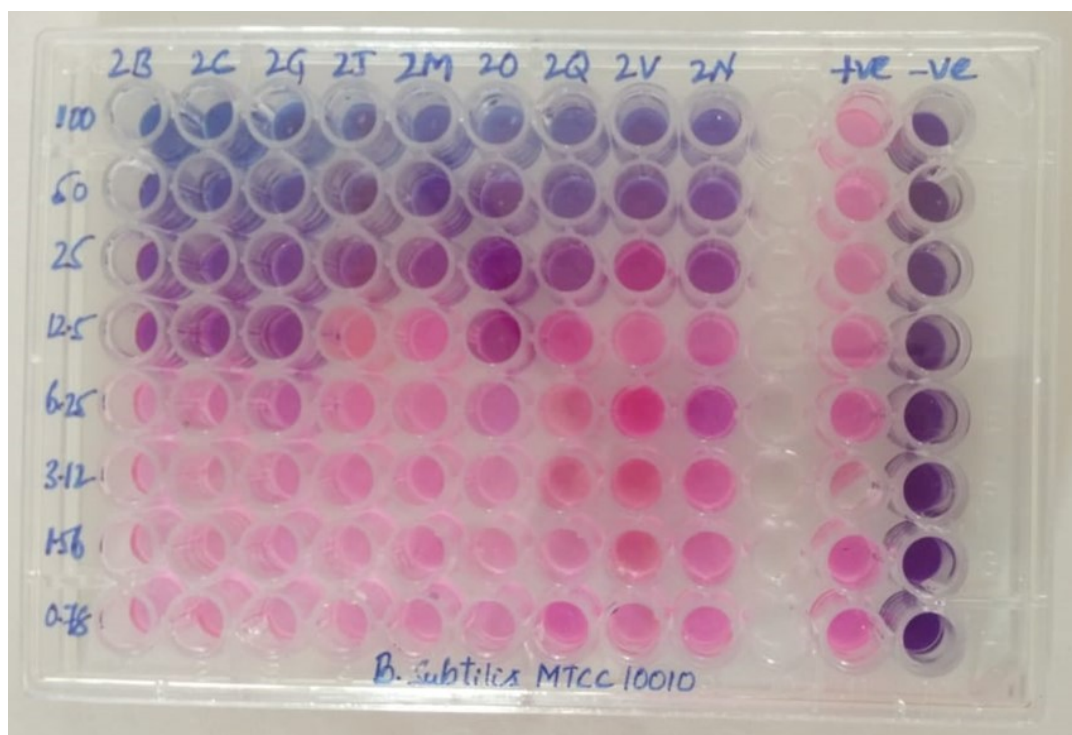

Figure S70. Determination of antibacterial activities MIC values for the compounds 5b, 5c, 5g, 5i, 5l, 5m, 5n, 5p and 5u and codes for 2B, 2C, 2G, 2J, 2M, 2O, 2Q, 2V and 2N, respectively using *S. aureus* and *B. subtilis* bacteria.
